# Supplementary material for: Nickel-catalyzed cascade hydrosilylation/cyclization of 1,7-enynes leading to silyl-containing quinolinones
Source: Royal Society of Chemistry journal article supplement (doi:10.1039/d2ob01771g), 2022-01-01

## Nickel-Catalyzed Cascade Hydrosilylation/Cyclization of 1,7-Enynes

Zhou Jin,<sup>†a</sup> Yun Cai,<sup>†a</sup> Zhengwen Wang,<sup>a</sup> Hongwei Jin,<sup>a</sup> Yunkui Liu,<sup>a</sup> and Bingwei Zhou<sup>\*a</sup>

<sup>a</sup>College of Chemical Engineering, Zhejiang University of Technology, Hangzhou, 310014, China.

E-mail: zhoubw@zjut.edu.cn

<sup>†</sup>These authors contributed equally to this work.

### Table of Contents

|                                                               |     |
|---------------------------------------------------------------|-----|
| 1. General Information                                        | S2  |
| 2. Nickel-Catalyzed Hydrosilylation/Cyclization of 1,7-Enynes | S3  |
| 2.1 Optimization of reaction conditions                       | S3  |
| 2.2 Experimental details and characterization of products     | S4  |
| 2.3 Evaluation of different silanes                           | S12 |
| 3. Mechanistic Studies                                        | S13 |
| 3.1 Radical trapping experiments                              | S13 |
| 3.2 Deuterium-labelling experiment                            | S14 |
| 3.3 The reaction of <b>1v</b> or <b>1w</b> with <b>2a</b>     | S15 |
| 4. References                                                 | S17 |
| 5. <sup>1</sup> H NMR, <sup>13</sup> C NMR and NOESY Spectra  | S18 |

## 1. General Information

Unless otherwise noted, all reactions were carried out in flame-dried reaction vessels with Teflon screw caps under nitrogen. Solvents were purified and dried according to standard methods prior to use. All commercially available reagents were obtained from chemical suppliers and used after proper purification if necessary. Flash column chromatography was performed on silica gel (200-300 mesh) with the indicated solvent mixtures. TLC analysis was performed on pre-coated, glass-backed silica gel plates and visualized with UV light.

The  $^1\text{H}$  NMR,  $^{13}\text{C}$  NMR and NOESY spectra were recorded on a Bruker 400 or 500 AV spectrometers. Chemical shifts ( $\delta$ ) were reported as parts per million (ppm) downfield from tetramethylsilane and the following abbreviations were used to identify the multiplicities: s = singlet, d = doublet, t = triplet, q = quartet, m = multiplet, dd = doublet of doublets, dt = doublet of triplets, dq = doublet of quartets, br = broad and all combinations thereof can be explained by their integral parts. Coupling constant (J) was reported in hertz unit (Hz). The high resolution mass spectra (HRMS) were recorded on an Agilent 6210 LC/TOF spectrometer. The 1,7-enynes were prepared according to the known procedure<sup>1-4</sup> and the silanes were commercially available and used as received.

## 2 Nickel-Catalyzed Hydrosilylation/Cyclization of 1,7-Enynes

### 2.1 Optimization of reaction conditions<sup>a</sup>

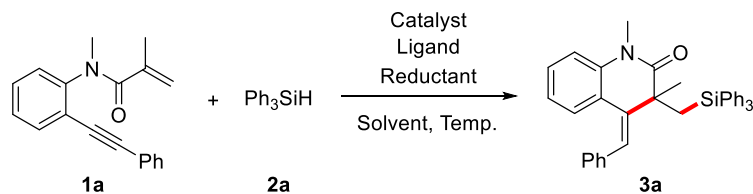

| Entry     | Catalyst/mol%                                          | Ligand/mol%    | Reductant/equiv         | Solvent    | Temp./°C  | Yield/ <b>3a</b> /% |
|-----------|--------------------------------------------------------|----------------|-------------------------|------------|-----------|---------------------|
| 1         | NiBr <sub>2</sub> /10                                  | <b>L1</b> /10  | - <sup>b</sup>          | THF        | 40        | 0                   |
| 2         | - <sup>c</sup>                                         | <b>L1</b> /10  | Zn/2                    | THF        | 40        | 0                   |
| 3         | NiBr <sub>2</sub> /10                                  | - <sup>d</sup> | Zn/2                    | THF        | 40        | 0                   |
| 4         | NiBr <sub>2</sub> /10                                  | <b>L1</b> /10  | Zn/2                    | THF        | 40        | 93                  |
| 5         | NiCl <sub>2</sub> /10                                  | <b>L1</b> /10  | Zn/2                    | THF        | 40        | 78                  |
| 6         | Ni(acac) <sub>2</sub> /10                              | <b>L1</b> /10  | Zn/2                    | THF        | 40        | 0                   |
| 7         | Ni(PPh <sub>3</sub> ) <sub>2</sub> Br <sub>2</sub> /10 | <b>L1</b> /10  | Zn/2                    | THF        | 40        | 0                   |
| 8         | NiCl <sub>2</sub> glyme/10                             | <b>L1</b> /10  | Zn/2                    | THF        | 40        | 0                   |
| 9         | Ni(dppe)Cl <sub>2</sub> /(10)                          | <b>L1</b> /10  | Zn/2                    | THF        | 40        | 0                   |
| 10        | Ni(OAc) <sub>2</sub> /10                               | <b>L1</b> /10  | Zn/2                    | THF        | 40        | 0                   |
| 11        | Ni(OTf) <sub>2</sub> /10                               | <b>L1</b> /10  | Zn/2                    | THF        | 40        | 6                   |
| 12        | Ni(cod) <sub>2</sub> /10                               | <b>L1</b> /10  | - <sup>b</sup>          | THF        | 40        | 90                  |
| 13        | NiBr <sub>2</sub> /10                                  | <b>L2</b> /10  | Zn/2                    | THF        | 40        | 12                  |
| 14        | NiBr <sub>2</sub> /10                                  | <b>L3</b> /10  | Zn/2                    | THF        | 40        | 11                  |
| 15        | NiBr <sub>2</sub> /10                                  | <b>L4</b> /10  | Zn/2                    | THF        | 40        | 36                  |
| 16        | NiBr <sub>2</sub> /10                                  | <b>L5</b> /10  | Zn/2                    | THF        | 40        | 81                  |
| 17        | NiBr <sub>2</sub> /10                                  | <b>L6</b> /10  | Zn/2                    | THF        | 40        | 40                  |
| 18        | NiBr <sub>2</sub> /10                                  | <b>L7</b> /10  | Zn/2                    | THF        | 40        | 0                   |
| 19        | NiBr <sub>2</sub> /10                                  | <b>L8</b> /10  | Zn/2                    | THF        | 40        | 0                   |
| 20        | NiBr <sub>2</sub> /10                                  | <b>L9</b> /10  | Zn/2                    | THF        | 40        | 0                   |
| 21        | NiBr <sub>2</sub> /10                                  | <b>L1</b> /10  | Zn/2                    | Toluene    | 40        | 71                  |
| 22        | NiBr <sub>2</sub> /10                                  | <b>L1</b> /10  | Zn/2                    | DMF        | 40        | 35                  |
| 23        | NiBr <sub>2</sub> /10                                  | <b>L1</b> /10  | Zn/2                    | Dioxane    | 40        | 67                  |
| 24        | NiBr <sub>2</sub> /10                                  | <b>L1</b> /10  | Fe/2                    | THF        | 40        | 0                   |
| 25        | NiBr <sub>2</sub> /10                                  | <b>L1</b> /10  | Mn/2                    | THF        | 40        | 77                  |
| 26        | NiBr <sub>2</sub> /10                                  | <b>L1</b> /10  | PhSiH <sub>3</sub> /0.2 | THF        | 40        | 0                   |
| 27        | NiBr <sub>2</sub> /5                                   | <b>L1</b> /10  | Zn/2                    | THF        | 40        | 74                  |
| 28        | NiBr <sub>2</sub> /10                                  | <b>L1</b> /10  | Zn/1                    | THF        | 40        | 68                  |
| 29        | NiBr <sub>2</sub> /10                                  | <b>L1</b> /5   | Zn/2                    | THF        | 40        | 76                  |
| <b>30</b> | <b>NiBr<sub>2</sub>/10</b>                             | <b>L1/10</b>   | <b>Zn/2</b>             | <b>THF</b> | <b>40</b> | <b>93</b>           |
| 31        | NiBr <sub>2</sub> /10                                  | <b>L1</b> /10  | Zn/2                    | THF        | 25        | 64                  |
| 32        | NiBr <sub>2</sub> /10                                  | <b>L1</b> /10  | Zn/2                    | THF        | 40        | 82 <sup>e</sup>     |

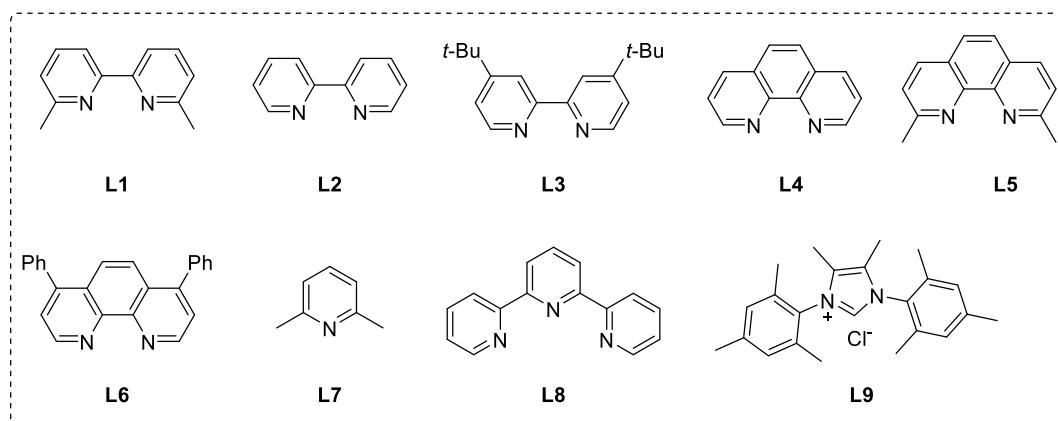

<sup>a</sup>Reaction conditions unless otherwise noted: **1a** (0.1 mmol), **2a** (1.5 equiv), catalyst, ligand, reductant, solvent (1 mL), 40 °C, 18 h under N<sub>2</sub> atmosphere. <sup>b</sup>No reductant. <sup>c</sup>No catalyst. <sup>d</sup>No ligand. <sup>e</sup>12 h.

## 2.2 Experimental details and characterization of products

In a 25 mL flame-dried Schlenk tube, **1a** (0.4 mmol, 110.1 mg), Ph<sub>3</sub>SiH (0.6 mmol, 156.3 mg), NiBr<sub>2</sub> (10 mol%, 0.04 mmol, 8.7 mg), **L1** (10 mol%, 0.04 mmol, 7.4 mg), Zn (2 equiv, 0.8 mmol, 52.3 mg), THF (4 mL) were added sequentially under nitrogen. The tube was sealed and stirred at 40 °C for 18 h. After completion, the reaction mixture was filtered through a short pad of silica gel and washed with ethyl acetate (20 mL). The combined organic phase was concentrated and purified by silica gel column chromatography (Petroleum ether : Ethyl acetate = 20 : 1) to provide the product **3a**.

### 4-benzylidene-1,3-dimethyl-3-((triphenylsilyl)methyl)-3,4-dihydroquinolin-2(1H)-one (**3a**)

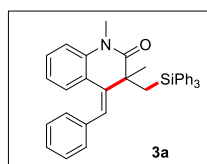

Yield: 93% (200.3 mg), white solid, mp: 176-178 °C

<sup>1</sup>H NMR (500 MHz, CDCl<sub>3</sub>) δ 7.50-7.48 (m, 6H), 7.35 (t, *J* = 7.3 Hz, 3H), 7.31-7.27 (m, 6H), 7.23-7.19 (m, 1H), 7.09 (dd, *J*<sub>1</sub> = 5.1 Hz, *J*<sub>2</sub> = 1.7 Hz, 3H), 6.94-6.89 (m, 3H), 6.79 (dd, *J*<sub>1</sub> = 7.6 Hz, *J*<sub>2</sub> = 1.2 Hz, 1H), 6.70 (t, *J* = 7.3 Hz, 1H), 6.39 (s, 1H), 3.01 (s, 3H), 1.89 (s, 2H), 1.44 (s, 3H).

<sup>13</sup>C NMR (125 MHz, CDCl<sub>3</sub>) δ 173.65, 139.35, 138.69, 137.22, 136.35, 135.26, 130.40, 129.79, 129.44, 128.79, 128.04, 127.81, 126.89, 126.40, 124.17, 122.30, 114.66, 47.94, 30.31, 24.14, 22.75.

HRMS(ESI) Calculated for C<sub>37</sub>H<sub>33</sub>ONNaSi<sup>+</sup> ([M+Na]<sup>+</sup>): 558.22217, found:

558.22236.

**4-benzylidene-1,3,6-trimethyl-3-((triphenylsilyl)methyl)-3,4-dihydroquinolin-2(1H)-one (3b)**

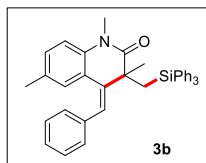

Yield: 89 % (195.5 mg), white solid, mp: 136-139 °C

$^1\text{H NMR}$  (500 MHz,  $\text{CDCl}_3$ )  $\delta$  7.49 (d,  $J = 6.8$  Hz, 6H), 7.35-7.27 (m, 10H), 7.10 (d,  $J = 3.5$  Hz, 2H), 7.01 (d,  $J = 7.9$  Hz, 1H), 6.95-6.91 (m, 2H), 6.82 (d,  $J = 8.2$  Hz, 1H), 6.53 (s, 1H), 6.38 (s, 1H), 2.99 (s, 3H), 1.98 (s, 3H), 1.89 (s, 2H), 1.43 (s, 3H).

$^{13}\text{C NMR}$  (125 MHz,  $\text{CDCl}_3$ )  $\delta$  173.50, 138.80, 137.19, 136.86, 136.34, 135.22, 131.56, 130.85, 129.67, 129.40, 129.29, 127.93, 127.75, 126.87, 126.10, 123.86, 114.47, 47.89, 30.30, 24.06, 22.83, 20.70.

**HRMS(ESI)** Calculated for  $\text{C}_{38}\text{H}_{35}\text{NONaSi}^+$  ( $[\text{M}+\text{Na}]^+$ ): 572.23767, found: 572.23801.

**4-benzylidene-1,3-dimethyl-2-oxo-3-((triphenylsilyl)methyl)-1,2,3,4-tetrahydroquinoline-6-carbonitrile (3c)**

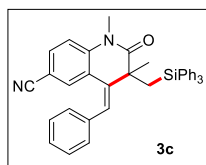

Yield: 68% (152.4 mg), white solid, mp: 194-195 °C

$^1\text{H NMR}$  (500 MHz,  $\text{CDCl}_3$ )  $\delta$  7.49-7.47 (m, 7H), 7.37 (t,  $J = 7.3$  Hz, 3H), 7.31 (t,  $J = 7.3$  Hz, 7H), 7.16-7.13 (m, 2H), 6.98 (d,  $J = 8.5$  Hz, 1H), 6.87-6.85 (m, 2H), 6.73 (d,  $J = 1.6$  Hz, 1H), 6.52 (s, 1H), 3.08 (s, 3H), 1.86 (d,  $J = 15.0$  Hz, 1H), 1.81 (d,  $J = 15.0$  Hz, 1H), 1.46 (s, 3H).

$^{13}\text{C NMR}$  (125 MHz,  $\text{CDCl}_3$ )  $\delta$  173.75, 142.86, 136.21, 135.86, 135.82, 134.69, 133.91, 132.56, 129.73, 129.47, 128.77, 128.45, 127.94, 127.86, 124.79, 118.67, 115.00, 105.44, 47.68, 30.40, 23.73, 22.90.

**HRMS(ESI)** Calculated for  $\text{C}_{38}\text{H}_{32}\text{N}_2\text{ONaSi}^+$  ( $[\text{M}+\text{Na}]^+$ ): 583.21783, found: 583.21761.

**Methyl**

**4-benzylidene-1,3-dimethyl-2-oxo-3-((triphenylsilyl)methyl)-1,2,3,4-tetrahydroquinoline-6-carboxylate (3d)**

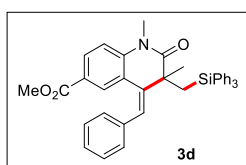

Yield: 76% (182.7 mg), white solid, mp: 173-174 °C

$^1\text{H NMR}$  (500 MHz,  $\text{CDCl}_3$ )  $\delta$  7.90 (d,  $J = 7.5$  Hz, 1H), 7.50-7.47 (m, 7H), 7.35 (t,  $J = 7.1$  Hz, 3H), 7.31-7.25 (m, 6H), 7.11 (s, 3H), 6.96 (d,  $J = 8.5$  Hz, 1H), 6.89 (s, 2H), 6.49 (s, 1H), 3.73 (s, 3H), 3.01 (s, 3H), 1.87 (s, 2H), 1.44 (s, 3H).

$^{13}\text{C}$  NMR (125 MHz,  $\text{CDCl}_3$ )  $\delta$  173.84, 166.46, 143.04, 137.44, 136.56, 136.29, 135.01, 132.05, 130.29, 129.56, 129.54, 128.22, 127.86, 127.62, 127.27, 124.01, 123.83, 114.39, 51.96, 47.89, 30.40, 24.18, 23.01.

HRMS(ESI) Calculated for  $\text{C}_{39}\text{H}_{35}\text{N}_2\text{O}_3\text{NaSi}^+$  ( $[\text{M}+\text{Na}]^+$ ): 616.22729, found: 616.22784.

**4-benzylidene-7-chloro-1,3-dimethyl-3-((triphenylsilyl)methyl)-3,4-dihydroquinolin-2(1H)-one (3e)**

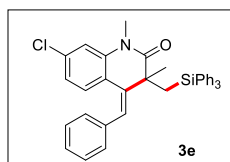

Yield: 55% (125.2 mg), white solid, mp: 158-161 °C

$^1\text{H}$  NMR (500 MHz,  $\text{CDCl}_3$ )  $\delta$  7.49 (dd,  $J_1 = 7.5$  Hz,  $J_2 = 1$  Hz, 6H), 7.37-7.28 (m, 9H), 7.13-7.11 (m, 3H), 6.91-6.88 (m, 3H), 6.65 (d,  $J = 1$  Hz, 2H), 6.42 (s, 1H), 2.97 (s, 3H), 1.92-1.85 (m, 2H), 1.43 (s, 3H).

$^{13}\text{C}$  NMR (125 MHz,  $\text{CDCl}_3$ )  $\delta$  173.59, 140.52, 137.54, 136.82, 136.33, 135.11, 134.32, 131.38, 129.70, 129.53, 128.21, 127.86, 127.16, 127.09, 122.52, 122.27, 115.03, 47.93, 30.33, 24.30, 22.99.

HRMS(ESI) Calculated for  $\text{C}_{37}\text{H}_{32}\text{ONClNaSi}^+$  ( $[\text{M}+\text{Na}]^+$ ): 592.18372, found: 592.18339.

**4-benzylidene-6,7-dichloro-1,3-dimethyl-3-((triphenylsilyl)methyl)-3,4-dihydroquinolin-2(1H)-one (3f)**

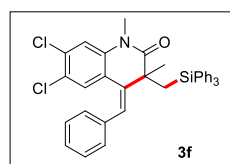

Yield: 72% (173.7 mg), white solid, mp: 161-162 °C

$^1\text{H}$  NMR (500 MHz,  $\text{CDCl}_3$ )  $\delta$  7.52-7.47 (m, 6H), 7.38-7.33 (m, 3H), 7.38-7.30 (m, 6H), 7.17-7.14 (m, 3H), 6.99 (s, 1H), 6.91 (dd,  $J_1 = 6.5$ ,  $J_2 = 2.6$  Hz, 2H), 6.66 (s, 1H), 6.48 (s, 1H), 2.98 (s, 3H), 1.88 (s, 2H), 1.43 (s, 3H).

$^{13}\text{C}$  NMR (125 MHz,  $\text{CDCl}_3$ )  $\delta$  173.38, 138.89, 136.29, 136.13, 134.91, 132.23, 131.45, 129.64, 129.52, 128.37, 128.17, 127.91, 127.62, 125.65, 123.92, 116.42, 47.84, 30.44, 24.27, 23.13.

HRMS(ESI) Calculated for  $\text{C}_{37}\text{H}_{31}\text{ONCl}_2\text{NaSi}^+$  ( $[\text{M}+\text{Na}]^+$ ): 626.14459, found: 626.14442.

**4-(4-ethylbenzylidene)-1,3-dimethyl-3-((triphenylsilyl)methyl)-3,4-dihydroquinolin-2(1H)-one (3g)**

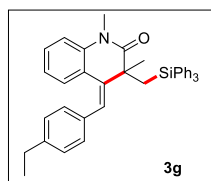

Yield: 92% (207.3 mg), white solid, mp: 169-170 °C

$^1\text{H}$  NMR (500 MHz,  $\text{CDCl}_3$ )  $\delta$  7.50-7.47 (m, 6H), 7.38-7.27 (m, 9H), 7.22 (d,  $J = 5.8$  Hz, 1H), 6.92 (dd,  $J_1 = 7.9$ ,  $J_2 = 3.8$  Hz, 3H), 6.84 (t,  $J = 8.9$  Hz, 3H), 6.71 (t,  $J = 7.4$  Hz, 1H), 6.36 (s, 1H), 3.00

(s, 3H), 2.57 (d,  $J = 7.6$  Hz, 1H), 2.54 (d,  $J = 7.6$  Hz, 1H), 1.88 (s, 2H), 1.43 (s, 3H), 1.18 (t,  $J = 7.6$  Hz, 3H).

**$^{13}\text{C}$  NMR (125 MHz,  $\text{CDCl}_3$ )**  $\delta$  173.69, 142.95, 139.25, 137.71, 136.32, 135.24, 134.36, 130.33, 129.70, 129.40, 128.62, 127.77, 127.50, 126.37, 124.37, 122.28, 114.62, 47.83, 30.28, 28.67, 24.05, 22.70, 15.46.

**HRMS(ESI)** Calculated for  $\text{C}_{39}\text{H}_{37}\text{ONNaSi}^+$  ( $[\text{M}+\text{Na}]^+$ ): 586.25360, found: 586.25366.

#### 4-(2-methoxybenzylidene)-1,3-dimethyl-3-((triphenylsilyl)methyl)-3,4-dihydroquinolin-2(1H)-one (3h)

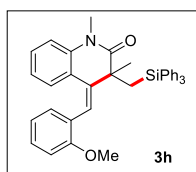

Yield: 66% (149.2 mg), white solid, mp: 218-220 °C

**$^1\text{H}$  NMR (500 MHz,  $\text{CDCl}_3$ )**  $\delta$  7.52 (d,  $J = 7.2$  Hz, 6H), 7.32 (t,  $J = 7.1$  Hz, 3H), 7.27 (t,  $J = 7.2$  Hz, 6H), 7.16 (t,  $J = 7.7$  Hz, 1H), 7.10 (t,  $J = 7.6$  Hz, 1H), 6.86 (d,  $J = 8.1$  Hz, 1H), 6.83-6.75 (m, 3H), 6.66 (s, 1H), 6.65-6.60 (m, 2H), 3.71 (s, 3H), 2.88 (s, 3H), 1.93 (s, 2H), 1.42 (s, 3H).

**$^{13}\text{C}$  NMR (125 MHz,  $\text{CDCl}_3$ )**  $\delta$  173.52, 157.68, 139.08, 139.05, 136.43, 135.41, 131.17, 130.11, 129.24, 128.42, 128.38, 127.65, 126.17, 124.59, 122.16, 121.97, 120.04, 114.43, 110.55, 55.40, 48.11, 30.14, 24.81, 23.83.

**HRMS(ESI)** Calculated for  $\text{C}_{38}\text{H}_{35}\text{O}_2\text{NNaSi}^+$  ( $[\text{M}+\text{Na}]^+$ ): 558.23230, found: 558.23293.

#### 4-(3-methoxybenzylidene)-1,3-dimethyl-3-((triphenylsilyl)methyl)-3,4-dihydroquinolin-2(1H)-one (3i)

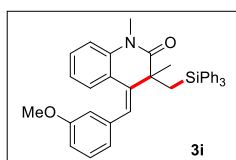

Yield: 63% (142.4 mg), white solid, mp: 176-179 °C

**$^1\text{H}$  NMR (500 MHz,  $\text{CDCl}_3$ )**  $\delta$  7.52-7.48 (m, 6H), 7.36-7.32 (m, 3H), 7.31-7.26 (m, 6H), 7.23-7.21 (m, 1H), 7.01 (t,  $J = 7.9$  Hz, 1H), 6.91 (d,  $J = 7.7$  Hz, 1H), 6.88-6.85 (m, 1H), 6.75-6.70 (m, 1H), 6.67-6.63 (m, 1H), 6.52-6.549 (m, 1H), 6.47-6.45 (m, 1H), 6.37 (s, 1H), 3.61 (s, 3H), 3.00 (s, 3H), 1.91 (s, 1H), 1.90 (s, 1H), 1.44 (s, 3H).

**$^{13}\text{C}$  NMR (125 MHz,  $\text{CDCl}_3$ )**  $\delta$  173.60, 159.29, 139.28, 139.02, 138.52, 136.35, 135.29, 130.50, 129.42, 128.98, 128.86, 127.79, 126.27, 124.07, 122.43, 122.25, 114.81, 114.58, 113.09, 55.19, 48.04, 30.26, 24.26, 22.79.

**HRMS(ESI)** Calculated for  $\text{C}_{38}\text{H}_{35}\text{O}_2\text{NNaSi}^+$  ( $[\text{M}+\text{Na}]^+$ ): 558.23230, found: 558.23289.

#### 4-(4-methoxybenzylidene)-1,3-dimethyl-3-((triphenylsilyl)methyl)-3,4-dihydroquinolin-2(1H)-one (3j)

Yield: 84% (189.9 mg), white solid, mp: 165-166 °C

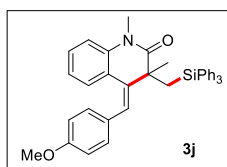

**<sup>1</sup>H NMR (500 MHz, CDCl<sub>3</sub>)** δ 7.49 (d, *J* = 7.0 Hz, 6H), 7.34 (t, *J* = 7.2 Hz, 3H), 7.28 (t, *J* = 7.2 Hz, 6H), 7.21 (t, *J* = 7.9 Hz, 1H), 6.92 (d, *J* = 8.1 Hz, 1H), 6.84 (t, *J* = 7.6 Hz, 3H), 6.73 (t, *J* = 7.4 Hz, 1H), 6.64 (d, *J* = 8.6 Hz, 2H), 6.31 (s, 1H), 3.74 (s, 3H), 3.01 (s, 3H), 1.90 (d, *J* = 15.1 Hz, 1H), 1.86 (d, *J* = 15.1 Hz, 1H), 1.42 (s, 3H).

**<sup>13</sup>C NMR (125 MHz, CDCl<sub>3</sub>)** δ 173.79, 158.61, 139.36, 136.77, 136.37, 135.35, 131.02, 130.25, 129.52, 129.40, 128.58, 127.78, 125.99, 124.47, 122.30, 114.66, 113.49, 55.31, 47.89, 30.31, 24.23, 22.68.

**HRMS(ESI)** Calculated for C<sub>38</sub>H<sub>35</sub>O<sub>2</sub>NNaSi<sup>+</sup> ([M+Na]<sup>+</sup>): 558.23230, found: 558.23295.

**4-([1,1'-biphenyl]-4-ylmethylene)-1,3-dimethyl-3-((triphenylsilyl)methyl)-3,4-dihydroquinolin-2(1H)-one (3k)**

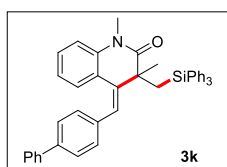

Yield: 96% (237.2 mg), white solid, mp: 155-156 °C

**<sup>1</sup>H NMR (500 MHz, CDCl<sub>3</sub>)** δ 7.58-7.54 (m, 2H), 7.53-7.48 (m, 6H), 7.41 (t, *J* = 7.7 Hz, 2H), 7.38-7.33 (m, 5H), 7.33-7.28 (m, 7H), 7.24 (s, 1H), 6.97 (d, *J* = 8.0 Hz, 2H), 6.95 (d, *J* = 8.0 Hz, 1H), 6.89 (dd, *J*<sub>1</sub> = 7.6, *J*<sub>2</sub> = 1.2 Hz, 1H), 6.74 (t, *J* = 7.5 Hz, 1H), 6.40 (s, 1H), 3.03 (s, 3H), 1.93 (d, *J* = 15.1 Hz, 1H), 1.90 (d, *J* = 15.0 Hz, 1H), 1.46 (s, 3H).

**<sup>13</sup>C NMR (125 MHz, CDCl<sub>3</sub>)** δ 173.67, 140.80, 139.49, 139.39, 138.83, 136.39, 136.27, 135.32, 130.45, 130.25, 129.47, 128.96, 128.90, 127.83, 127.47, 127.02, 126.63, 126.03, 124.23, 122.40, 114.72, 48.11, 30.34, 24.27, 22.79.

**HRMS(ESI)** Calculated for C<sub>43</sub>H<sub>37</sub>ONNaSi<sup>+</sup> ([M+Na]<sup>+</sup>): 634.25311, found: 634.25366.

**tert-butyl**

**(4-((1,3-dimethyl-2-oxo-3-((triphenylsilyl)methyl)-2,3-dihydroquinolin-4(1H)-ylidene)methyl)phenyl)carbamate (3l)**

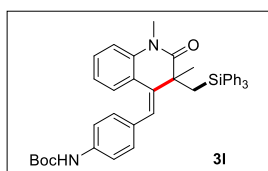

Yield: 71% (184.7 mg), white solid, mp: 189-192 °C

**<sup>1</sup>H NMR (500 MHz, CDCl<sub>3</sub>)** δ 7.48 (d, *J* = 7.1 Hz, 6H), 7.33 (t, *J* = 7.1 Hz, 3H), 7.27 (t, *J* = 7.2 Hz, 6H), 7.20 (t, *J* = 7.7 Hz, 1H), 7.11 (d, *J* = 8.0 Hz, 2H), 6.92 (d, *J* = 8.1 Hz, 1H), 6.83 (t, *J* = 8.0 Hz, 3H), 6.71 (t, *J* = 7.4 Hz, 1H), 6.52 (s, 1H), 6.30 (s, 1H), 3.01 (s, 3H), 1.91 (d, *J* = 15.0 Hz, 1H), 1.86 (d, *J* = 15.0 Hz, 1H), 1.49 (s, 9H), 1.42 (s, 3H).

**<sup>13</sup>C NMR (125 MHz, CDCl<sub>3</sub>)** δ 173.74, 152.80, 139.28, 137.45, 137.20, 136.33, 135.30, 131.73, 130.45, 130.24, 129.40, 128.68, 127.77, 125.92, 124.27, 122.36, 117.94, 114.64, 80.68, 47.96, 30.30, 28.53, 24.27, 22.65.



**HRMS(ESI)** Calculated for  $C_{42}H_{42}N_2O_3NaSi^+$  ( $[M+Na]^+$ ): 673.28528, found: 673.28569.

**methyl**

**(*R,E*)-4-((1,3-dimethyl-2-oxo-3-((triphenylsilyl)methyl)-2,3-dihydroquinolin-4(1*H*)-ylidene)methyl)benzoate (3m)**

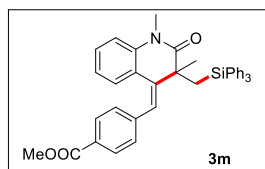

Yield: 77% (182.7 mg), white solid, mp: 152-154 °C

**$^1H$  NMR (500 MHz,  $CDCl_3$ )**  $\delta$  7.77 (d,  $J = 8.3$  Hz, 2H), 7.49 (d,  $J = 6.8$  Hz, 6H), 7.39-7.24 (m, 10H), 6.94 (dd,  $J_1 = 8.2$  Hz,  $J_2 = 2.9$  Hz, 3H), 6.74-6.67 (m, 2H), 6.38 (s, 1H), 3.86 (s, 3H),

3.03 (s, 3H), 1.95 (d,  $J = 15.0$  Hz, 1H), 1.90 (d,  $J = 15.0$  Hz, 1H), 1.46 (s, 3H).

**$^{13}C$  NMR (125 MHz,  $CDCl_3$ )**  $\delta$  173.33, 167.06, 142.20, 141.12, 139.33, 136.29, 136.20, 135.14, 130.31, 129.68, 129.48, 129.30, 128.34, 127.80, 125.39, 123.52, 122.40, 114.77, 52.15, 48.28, 30.29, 24.35, 22.70.

**HRMS(ESI)** Calculated for  $C_{39}H_{35}N_2O_3NaSi^+$  ( $[M+Na]^+$ ): 616.22729, found: 616.22784.

**(*R,E*)-4-((1,3-dimethyl-2-oxo-3-((triphenylsilyl)methyl)-2,3-dihydroquinolin-4(1*H*)-ylidene)methyl)benzotrile (3n)**

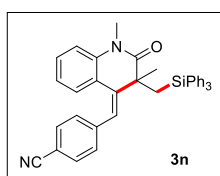

Yield: 68% (152.3 mg), white solid, mp: 146-147 °C

**$^1H$  NMR (500 MHz,  $CDCl_3$ )**  $\delta$  7.50-7.47 (m, 6H), 7.38-7.34 (m, 5H), 7.29 (t,  $J = 7.3$  Hz, 7H), 6.96 (t,  $J = 7.2$  Hz, 3H), 6.74 (t,  $J = 7.4$  Hz, 1H), 6.67 (dd,  $J_1 = 7.6$ ,  $J_2 = 1.0$  Hz, 1H), 6.32 (s, 1H), 3.03

(s, 3H), 1.95 (d,  $J = 15.1$  Hz, 1H), 1.89 (d,  $J = 15.0$  Hz, 1H), 1.45 (s, 3H).

**$^{13}C$  NMR (125 MHz,  $CDCl_3$ )**  $\delta$  173.17, 142.44, 142.29, 139.43, 136.29, 135.08, 131.80, 130.33, 130.18, 129.73, 129.56, 127.86, 124.56, 123.07, 122.51, 119.13, 114.98, 110.23, 48.43, 30.34, 24.38, 22.63.

**HRMS(ESI)** Calculated for  $C_{38}H_{32}N_2ONaSi^+$  ( $[M+Na]^+$ ): 583.21783, found: 583.21767.

**(*R,E*)-1,3-dimethyl-4-(naphthalen-2-ylmethylene)-3-((triphenylsilyl)methyl)-3,4-dihydroquinolin-2(1*H*)-one (3o)**

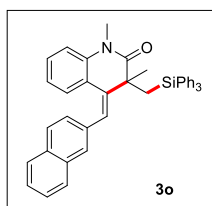

Yield: 86% (201.3 mg), white solid, mp: 171-172 °C

**$^1H$  NMR (500 MHz,  $CDCl_3$ )**  $\delta$  7.80-7.74 (m, 1H), 7.72-7.67 (m, 1H), 7.61-7.54 (m, 7H), 7.49-7.44 (m, 2H), 7.43-7.38 (m, 4H), 7.35 (t,  $J = 7.2$  Hz, 6H), 7.23-7.20 (m, 1H), 7.09-7.04 (m, 1H), 7.01 (d,  $J = 8.1$  Hz, 1H), 6.91-6.85 (m, 1H), 6.72 (t,  $J = 7.4$  Hz, 1H), 6.60 (s,

1H), 3.11 (s, 3H), 2.04 (d,  $J = 15.0$  Hz, 1H), 1.99 (d,  $J = 15.0$  Hz, 1H), 1.55 (s, 3H).

$^{13}\text{C}$  NMR (100 MHz,  $\text{CDCl}_3$ )  $\delta$  173.41, 139.10, 138.71, 136.13, 135.04, 134.47, 133.23, 132.22, 130.20, 129.20, 128.86, 128.73, 127.76, 127.58, 127.49, 126.95, 126.18, 125.87, 123.88, 122.11, 114.45, 47.91, 30.11, 24.19, 22.59.

HRMS(ESI) Calculated for  $\text{C}_{41}\text{H}_{35}\text{NONaSi}^+$  ( $[\text{M}+\text{Na}]^+$ ): 608.23853, found: 608.23801.

**(*R,E*)-1,3-dimethyl-4-(thiophen-3-ylmethylene)-3-((triphenylsilyl)methyl)-3,4-dihydroquinolin-2(1*H*)-one (3p)**

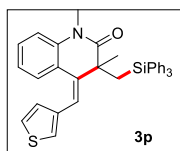

Yield: 69% (149.4 mg), white solid, mp: 158-159 °C

$^1\text{H}$  NMR (500 MHz,  $\text{CDCl}_3$ )  $\delta$  7.49 (d,  $J = 7.0$  Hz, 6H), 7.33 (d,  $J = 7.2$  Hz, 3H), 7.27 (t,  $J = 7.3$  Hz, 7H), 6.99 (m, 2H), 6.91 (d,  $J = 8.1$  Hz, 1H), 6.78 (m, 2H), 6.61 (d,  $J = 4.8$  Hz, 1H), 6.30 (s, 1H), 2.98 (s, 3H), 1.94 (d,  $J = 15.0$  Hz, 1H), 1.87 (d,  $J = 15.0$  Hz, 1H), 1.42 (s, 3H).

$^{13}\text{C}$  NMR (125 MHz,  $\text{CDCl}_3$ )  $\delta$  173.66, 139.13, 137.92, 137.59, 136.34, 135.27, 130.15, 129.40, 128.96, 128.27, 127.75, 124.72, 124.58, 124.29, 122.26, 120.78, 114.55, 48.00, 30.25, 24.44, 22.74.

HRMS(ESI) Calculated for  $\text{C}_{35}\text{H}_{31}\text{NOSNaSi}^+$  ( $[\text{M}+\text{Na}]^+$ ): 564.17926, found: 564.17878.

**(*R,E*)-1,3-dimethyl-4-pentylidene-3-((triphenylsilyl)methyl)-3,4-dihydroquinolin-2(1*H*)-one (3q)**

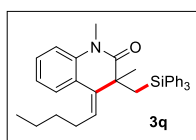

Yield: 76% (156.6 mg), yellow oil

$^1\text{H}$  NMR (500 MHz,  $\text{CDCl}_3$ )  $\delta$  7.46-7.43 (m, 6H), 7.37-7.33 (m, 3H), 7.35-7.29 (m, 7H), 7.00-6.96 (m, 1H), 6.92 (d,  $J = 8.1$  Hz, 1H), 6.89 (dd,  $J_1 = 7.5$ ,  $J_2 = 1.4$  Hz, 1H), 5.41 (dd,  $J_1 = 8.5$  Hz,  $J_2 = 5.5$  Hz, 1H), 3.00 (s, 3H), 2.12-2.04 (m, 1H), 1.97-1.93 (m, 1H), 1.80 (d,  $J = 14.9$  Hz, 1H), 1.72 (d,  $J = 14.9$  Hz, 1H), 1.36 (s, 3H), 1.22-1.16 (m, 2H), 1.15-1.05 (m, 2H), 0.79 (t,  $J = 7.0$  Hz, 3H).

$^{13}\text{C}$  NMR (125 MHz,  $\text{CDCl}_3$ )  $\delta$  174.54, 139.13, 136.34, 135.71, 135.40, 129.42, 129.12, 128.06, 127.78, 125.04, 122.20, 114.28, 47.01, 32.30, 30.23, 29.11, 23.58, 22.68, 22.63, 14.11.

HRMS(ESI) Calculated for  $\text{C}_{35}\text{H}_{37}\text{ONNaSi}^+$  ( $[\text{M}+\text{Na}]^+$ ): 538.25378, found: 538.25366.

**4-(cyclopropylmethylene)-1,3-dimethyl-3-((triphenylsilyl)methyl)-3,4-dihydroquinolin-2(1*H*)-one (3r)**

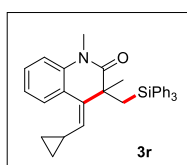

Yield: 78% (155.8 mg), white solid, mp: 145-146 °C

**$^1\text{H}$  NMR (500 MHz,  $\text{CDCl}_3$ )**  $\delta$  7.49-7.46 (m, 6H), 7.37-7.34 (m, 3H), 7.31-7.27 (m, 7H), 7.25 (s, 1H), 7.01-6.96 (m, 1H), 6.90 (d,  $J = 7.9$  Hz, 1H), 4.85 (d,  $J = 9.9$  Hz, 1H), 2.92 (s, 3H), 1.89 (d,  $J = 14.9$  Hz, 1H), 1.80 (d,  $J = 14.9$  Hz, 1H), 1.68-1.61 (m, 1H), 1.27 (s, 3H), 0.65-0.59 (m, 2H), 0.26-0.19 (m, 1H), -0.04--0.10 (m, 1H).

**$^{13}\text{C}$  NMR (125 MHz,  $\text{CDCl}_3$ )**  $\delta$  174.24, 139.06, 136.42, 135.57, 135.13, 132.45, 129.34, 127.98, 127.76, 125.08, 122.27, 114.37, 47.25, 30.20, 24.90, 22.98, 11.66, 8.52, 7.86.

**HRMS(ESI)** Calculated for  $\text{C}_{34}\text{H}_{33}\text{NONaSi}^+$  ( $[\text{M}+\text{Na}]^+$ ): 522.22229, found: 522.22236.

**1-benzyl-4-benzylidene-3-methyl-3-((triphenylsilyl)methyl)-3,4-dihydroquinolin-2(1H)-one (3s)**

Yield: 84% (205.4 mg), white solid, mp: 170-172 °C

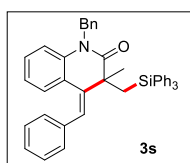

**$^1\text{H}$  NMR (500 MHz,  $\text{CDCl}_3$ )**  $\delta$  7.52 (d,  $J = 6.8$  Hz, 6H), 7.34-7.25 (m, 12H), 7.19 (d,  $J = 7.0$  Hz, 3H), 7.06 (s, 3H), 6.85 (d,  $J = 4.5$  Hz, 3H), 6.67 (d,  $J = 7.1$  Hz, 1H), 6.60 (t,  $J = 7.3$  Hz, 1H), 6.40 (s, 1H), 5.04 (d,  $J = 16.4$  Hz, 1H), 4.72 (d,  $J = 16.4$  Hz, 1H), 2.13 (d,  $J = 14.8$  Hz, 1H), 1.98 (d,  $J = 14.8$  Hz, 1H), 1.55 (s, 3H).

**$^{13}\text{C}$  NMR (125 MHz,  $\text{CDCl}_3$ )**  $\delta$  174.11, 138.38, 137.66, 137.29, 136.99, 136.31, 135.16, 130.27, 129.77, 129.47, 128.85, 128.74, 127.96, 127.79, 127.11, 126.91, 126.87, 126.32, 124.38, 122.39, 115.49, 48.15, 46.53, 24.30, 22.01.

**HRMS(ESI)** Calculated for  $\text{C}_{43}\text{H}_{37}\text{NONaSi}^+$  ( $[\text{M}+\text{Na}]^+$ ): 634.25311, found: 634.25366.

**4-benzylidene-1-(methoxymethyl)-3-methyl-3-((triphenylsilyl)methyl)-3,4-dihydroquinolin-2(1H)-one (3t)**

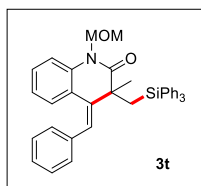

Yield: 76% (171.8 mg), white solid, mp: 167-170 °C

**$^1\text{H}$  NMR (500 MHz,  $\text{CDCl}_3$ )**  $\delta$  7.48 (d,  $J = 6.8$  Hz, 6H), 7.34 (t,  $J = 7.3$  Hz, 3H), 7.28 (t,  $J = 7.3$  Hz, 7H), 7.22-7.19 (m, 1H), 7.08-7.05 (m, 3H), 6.85 (dd,  $J_1 = 6.4$  Hz,  $J_2 = 2.6$  Hz, 2H), 6.69 (t,  $J = 4.6$  Hz, 2H), 6.33 (s, 1H), 5.15 (d,  $J = 10.6$  Hz, 1H), 5.01 (d,  $J = 10.6$  Hz, 1H), 3.34 (s, 3H), 2.08 (d,  $J = 15.0$  Hz, 1H), 1.89 (d,  $J = 15.0$  Hz, 1H), 1.549 (s, 3H).

**$^{13}\text{C}$  NMR (125 MHz,  $\text{CDCl}_3$ )**  $\delta$  175.05, 138.19, 137.29, 136.96, 136.32, 135.17, 130.21, 129.78, 129.50, 129.00, 127.98, 127.82, 127.09, 126.96, 124.14, 122.91, 115.89, 74.57, 56.28, 48.20, 24.00, 21.96.

**HRMS(ESI)** Calculated for  $\text{C}_{43}\text{H}_{35}\text{N}_2\text{ONaSi}^+$  ( $[\text{M}+\text{Na}]^+$ ): 588.23348, found: 588.24361.

**4-benzylidene-1-methyl-3-phenyl-3-((triphenylsilyl)methyl)-3,4-dihydroquinolin-2(1H)-one (3u)**

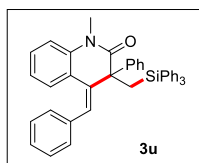

Yield: 68% (162.5 mg), white solid, mp: 255-256 °C

$^1\text{H NMR}$  (500 MHz,  $\text{CDCl}_3$ )  $\delta$  7.62 (d,  $J = 6.9$  Hz, 6H), 7.30 (d,  $J = 7.2$  Hz, 3H), 7.25 (t,  $J = 7.1$  Hz, 8H), 7.12-7.01 (m, 6H), 7.04-6.96 (m, 2H), 6.91 (d,  $J = 3.9$  Hz, 2H), 6.85 (s, 1H), 6.67 (d,  $J = 8.1$  Hz, 1H), 6.58 (t,  $J = 7.5$  Hz, 1H), 2.87 (s, 3H), 2.77 (d,  $J = 15.0$  Hz, 1H), 2.14 (d,  $J = 15.0$  Hz, 1H).

$^{13}\text{C NMR}$  (125 MHz,  $\text{CDCl}_3$ )  $\delta$  170.51, 144.36, 138.97, 136.67, 136.61, 136.52, 136.24, 130.11, 129.99, 129.79, 129.06, 128.82, 128.55, 128.15, 127.57, 127.28, 126.75, 126.24, 124.34, 122.19, 114.88, 59.46, 30.50, 27.65.

**HRMS(ESI)** Calculated for  $\text{C}_{42}\text{H}_{35}\text{NONaSi}^+$  ( $[\text{M}+\text{Na}]^+$ ): 620.23724, found: 620.23709.

**(R,E)-4-benzylidene-1,3-dimethyl-3-((methyldiphenylsilyl)methyl)-3,4-dihydroquinolin-2(1H)-one**

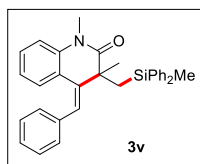

Yield: 68% (128.8 mg), sticky oil.

$^1\text{H NMR}$  (400 MHz,  $\text{CDCl}_3$ )  $\delta$  7.41 (d,  $J = 7.6$  Hz, 2H), 7.35-7.29 (m, 5H), 7.27-7.18 (m, 4H), 7.15 (q,  $J = 7.2$  Hz, 3H), 7.04-7.02 (m, 2H), 6.93-6.87 (m, 2H), 6.72 (t,  $J = 7.2$  Hz, 1H), 6.54 (s, 1H), 3.06 (s, 3H), 1.56 (d,  $J = 14.8$  Hz, 1H), 1.51 (s, 3H), 1.42 (d,  $J = 14.8$  Hz, 1H), 0.70 (s, 3H).

$^{13}\text{C NMR}$  (100 MHz,  $\text{CDCl}_3$ )  $\delta$  173.61, 139.30, 137.50, 134.78, 134.53, 130.40, 129.64, 129.29, 129.17, 128.71, 128.25, 127.89, 127.83, 126.96, 125.90, 122.20, 114.76, 47.38, 30.18, 23.88, 22.84, -2.68.

**HRMS(ESI)** Calculated for  $\text{C}_{32}\text{H}_{31}\text{NONaSi}^+$  ( $[\text{M}+\text{Na}]^+$ ): 496.20719, found: 496.20701.

### 2.3 Evaluation of different silanes

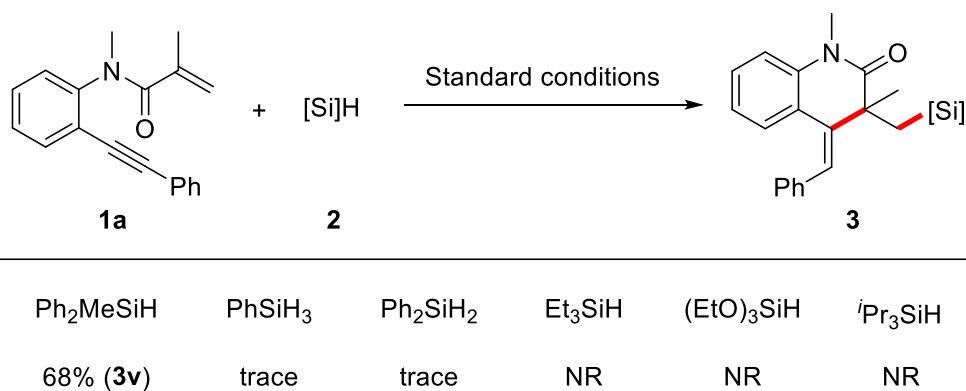

In a 25 mL flame-dried Schlenk tube, 1, 7-enynes (0.4 mmol, 110.1mg), silane (1.5 equiv), NiBr<sub>2</sub> (10 mol%, 0.04 mmol, 8.7 mg), **L1** (10 mol%, 0.02 mmol, 7.4 mg), Zn (2 equiv, 0.8 mmol, 52.3 mg), and THF (4 mL) were added sequentially under nitrogen. The tube was sealed and stirred at 40 °C for 18 h. After completion, the reaction mixture was filtered through a short pad of silica gel and washed with ethyl acetate (20 mL). The combined organic phase was concentrated and purified by silica gel column chromatography (Petroleum ether : Ethyl acetate = 20 : 1) to provide the product.

### 3 Mechanistic Studies

#### 3.1 Radical trapping experiments

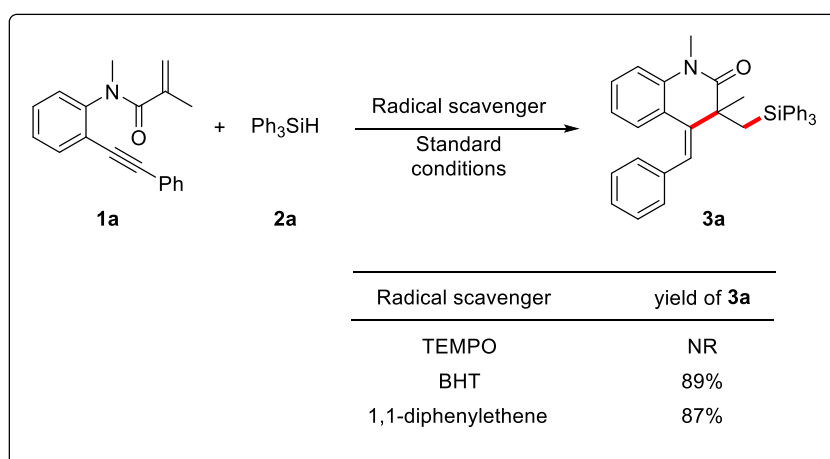

#### Experimental procedure:

In a 25 mL flame-dried Schlenk tube, 1, 7-Enynes (0.4 mmol, 110.1mg), Ph<sub>3</sub>SiH

(1.5 equiv, 156.3 mg), NiBr<sub>2</sub> (10 mol%, 0.04 mmol, 8.7 mg), **L1** (10 mol%, 0.02 mmol, 7.4 mg), Zn (2 equiv, 0.8 mmol, 52.3 mg), THF (4 mL) and radical scavenger (1 equiv) were added sequentially under nitrogen. The tube was sealed and stirred at 40 °C for 18 h. After completion, the reaction mixture was filtered through a short pad of silica gel and washed with ethyl acetate (20 mL). The combined organic phase was concentrated and purified by silica gel column chromatography (Petroleum ether : Ethyl acetate = 20 : 1) to provide the product **3a**.

### 3.2 Deuterium-labelling experiment

**Ph<sub>3</sub>SiD (99% D)** was synthesized according to the known literature<sup>5</sup>. <sup>1</sup>H NMR (500 MHz, CDCl<sub>3</sub>) δ 7.60 – 7.55 (m, 6H), 7.43 – 7.39 (m, 3H), 7.38 – 7.34 (m, 6H).

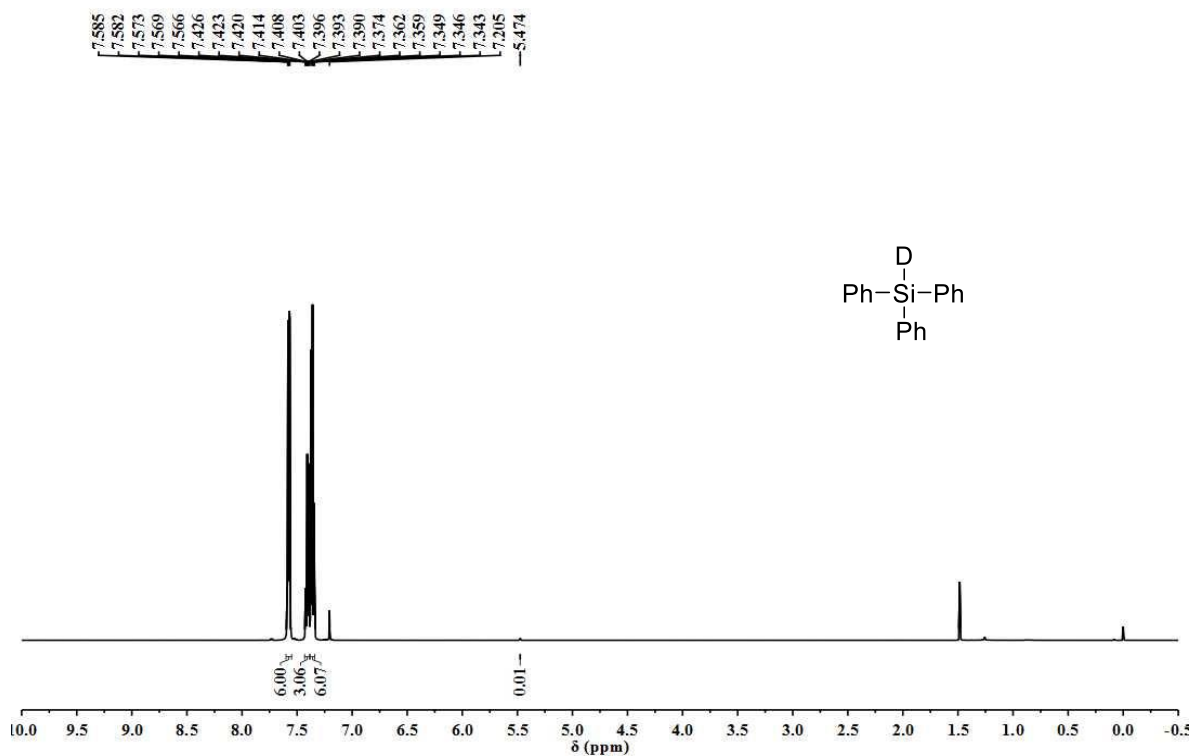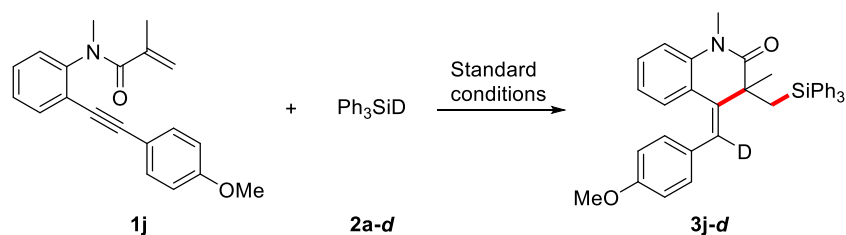

#### Experimental procedure:

In a 25 mL flame-dried Schlenk tube, **1**, 7-Enynes (0.4 mmol, 110.1 mg), **Ph<sub>3</sub>SiD**

(1.5 equiv, 99% D, 157.9 mg), NiBr<sub>2</sub> (10 mol%, 0.04 mmol, 8.7 mg), **L1** (10 mol%, 0.02 mmol, 7.4 mg), Zn (2 equiv, 0.8 mmol, 52.3 mg), THF (4 mL) were added sequentially under nitrogen. The tube was sealed and stirred at 40 °C for 18 h. After completion, the reaction mixture was filtered through a short pad of silica gel and washed with ethyl acetate (20 mL). The combined organic phase was concentrated and purified by silica gel column chromatography (Petroleum ether : Ethyl acetate = 20 : 1) to provide the product **3j-d** in 81% yield.

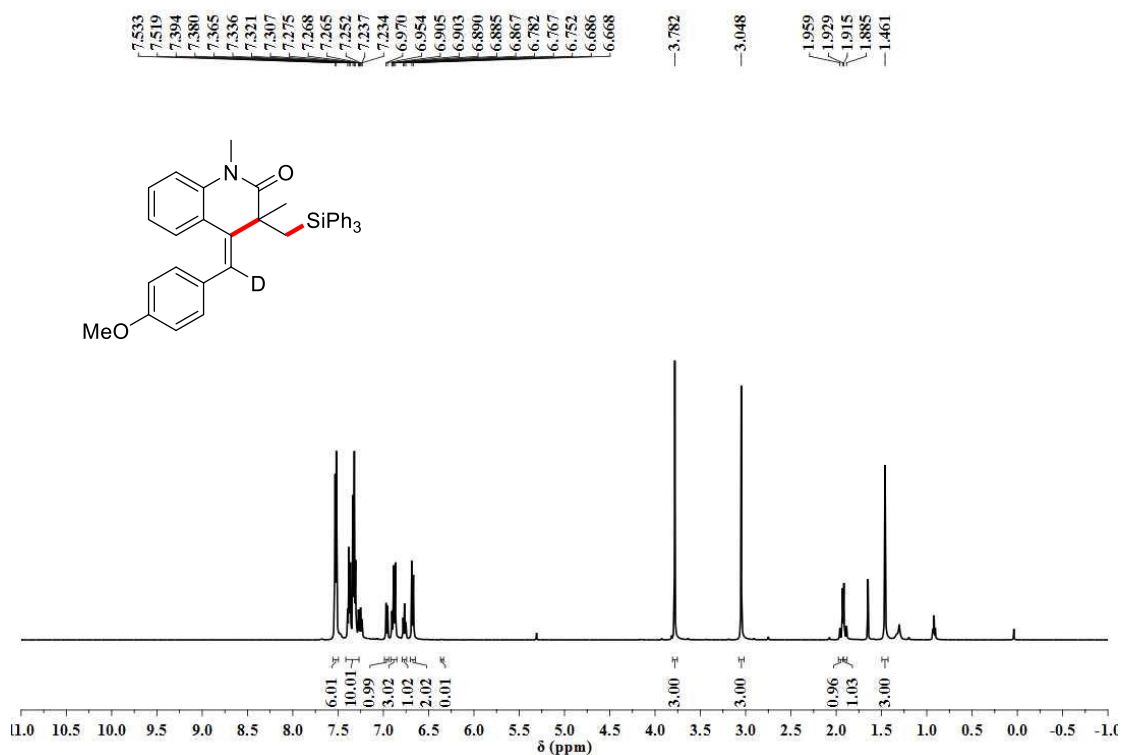

### 3.3 The reaction of **1v** or **1w** with **2a**

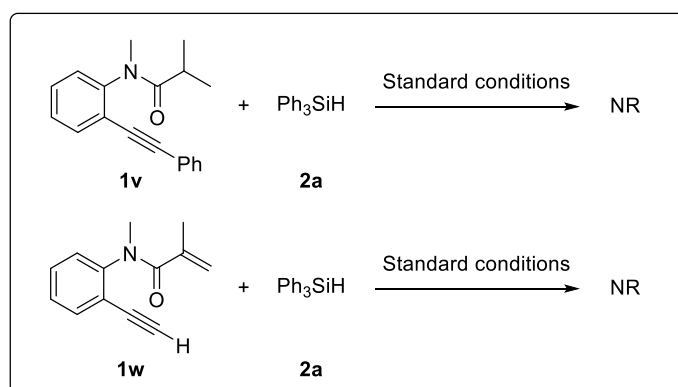

**Experimental procedure:**

In a 25 mL flame-dried Schlenk tube, **1v** (0.4 mmol, 110.8 mg) or **1w** (0.2 mmol, 79.6 mg), Ph<sub>3</sub>SiH (1.5 equiv, 156.3 mg), NiBr<sub>2</sub> (10 mol%, 0.04 mmol, 8.7 mg), **L1** (10 mol%, 0.02 mmol, 7.4 mg), Zn (2 equiv, 0.8 mmol, 52.3 mg) and THF (4 mL) were added sequentially under nitrogen. The tube was sealed and stirred at 40 °C for 18 h. After completion, the reaction mixture was monitored by TLC analysis and no any product was detected.



#### 4. References

1. J. T. M. Correia, G. P. da Silva, E. André and M. W. Paixão, *Adv. Synth. Catal.* 2019, **361**, 5558.
2. C. Wu, J. Liao and S. Ge, *Angew. Chem. Int. Ed.* 2019, **58**, 8882.
3. H.-Y. Liu, Y. Lu, Y. Li and J.-H. Li, *Organ. Lett.* 2020, **22**, 8819.
4. Y. Qu, W. Xu, J. Zhang, Y. Liu, Y. Li, H. Song and Q. Wang, *J. Org. Chem.* 2020, **85**, 5379.
5. V. Leich, T. P. Spaniol and J. Okuda, *Organometallics* 2016, **35**, 1179.

## 5. $^1\text{H}$ NMR, $^{13}\text{C}$ NMR and NOESY Spectra

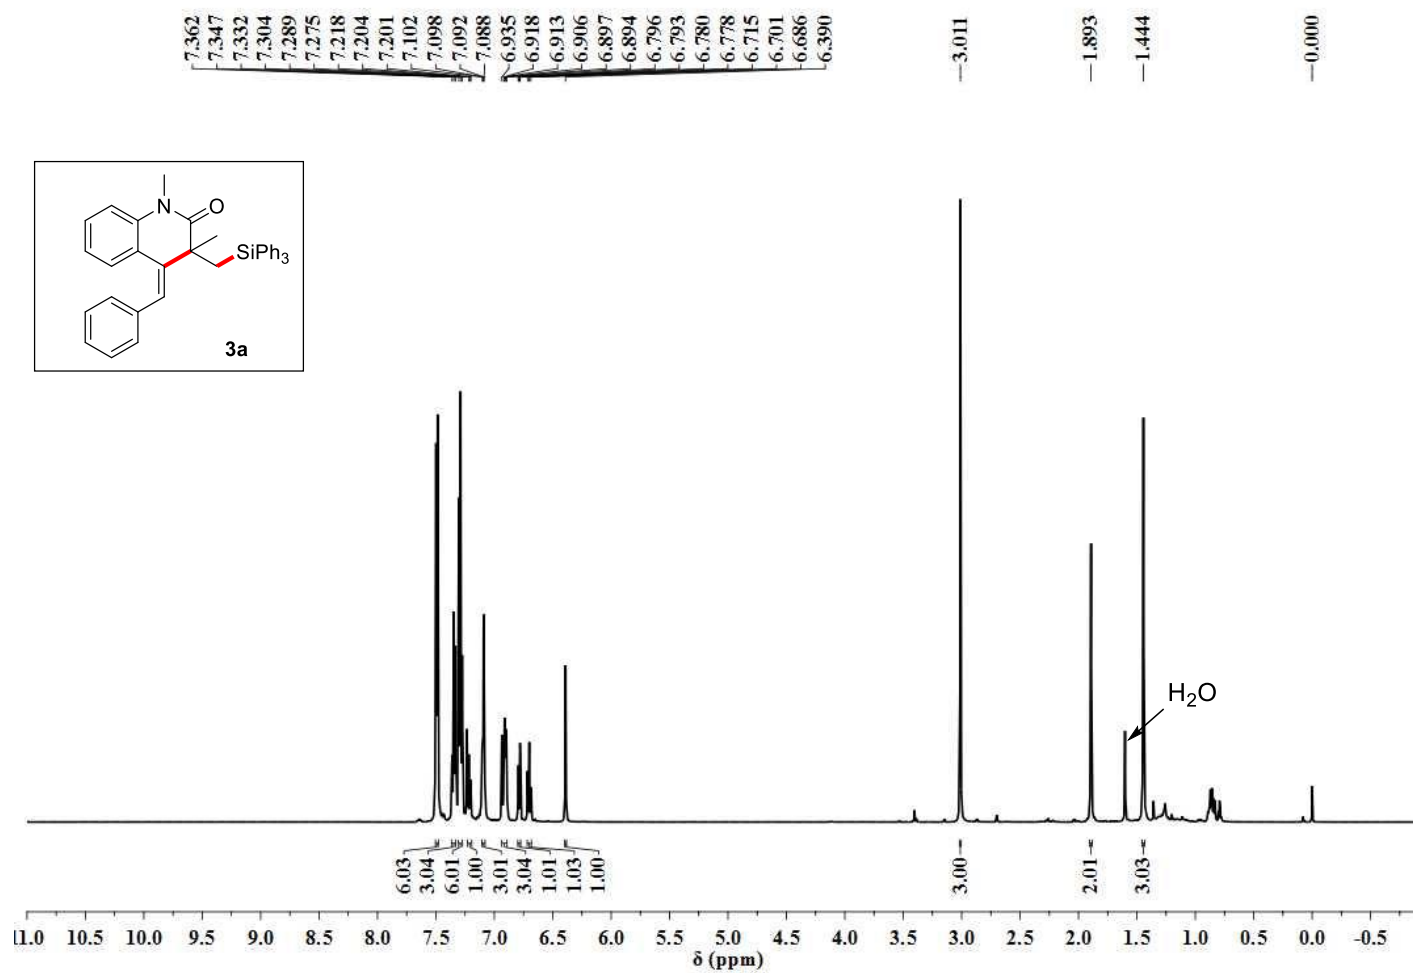

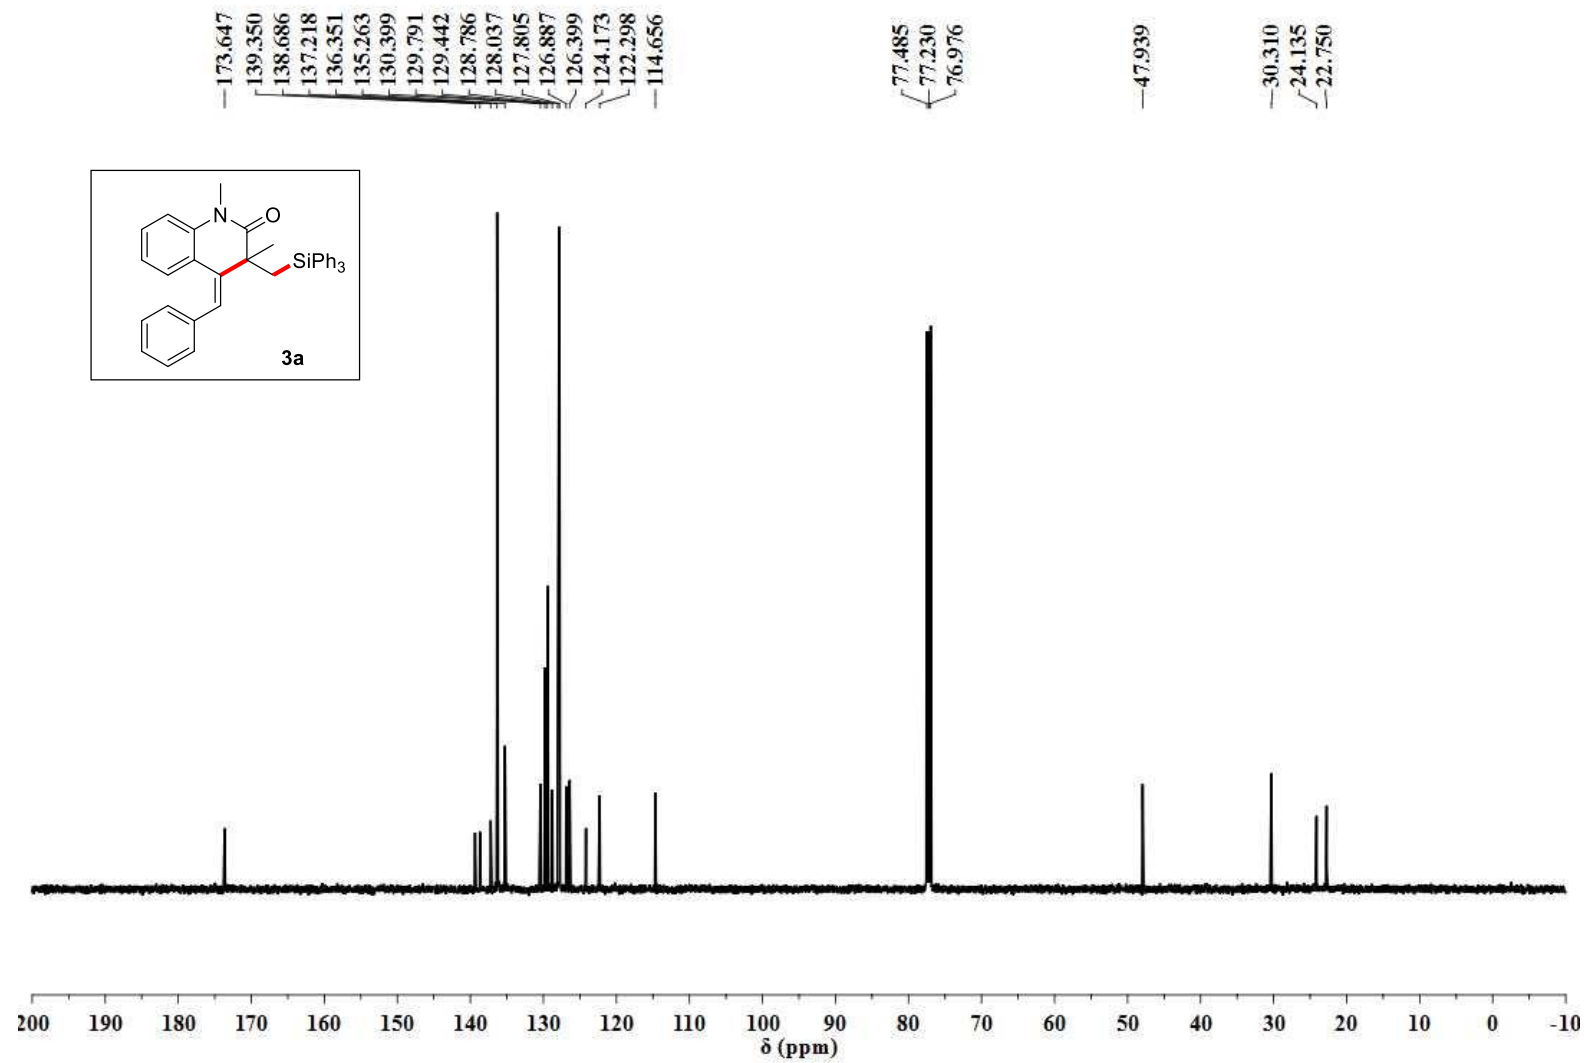

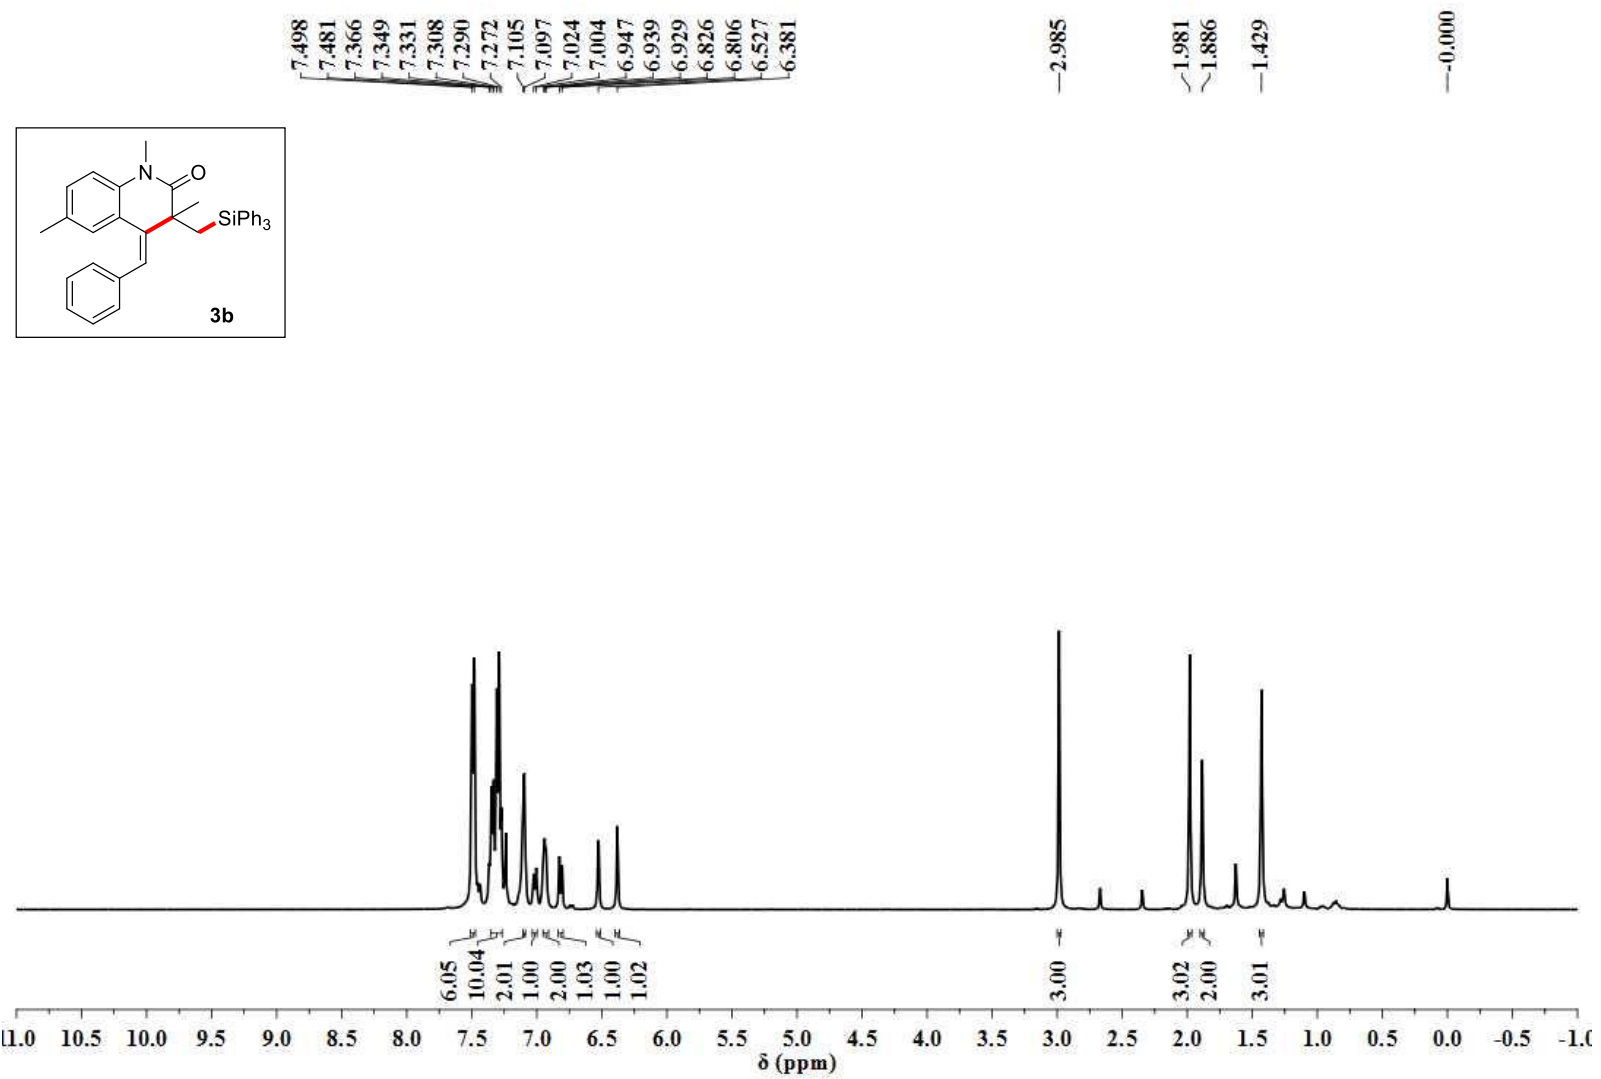

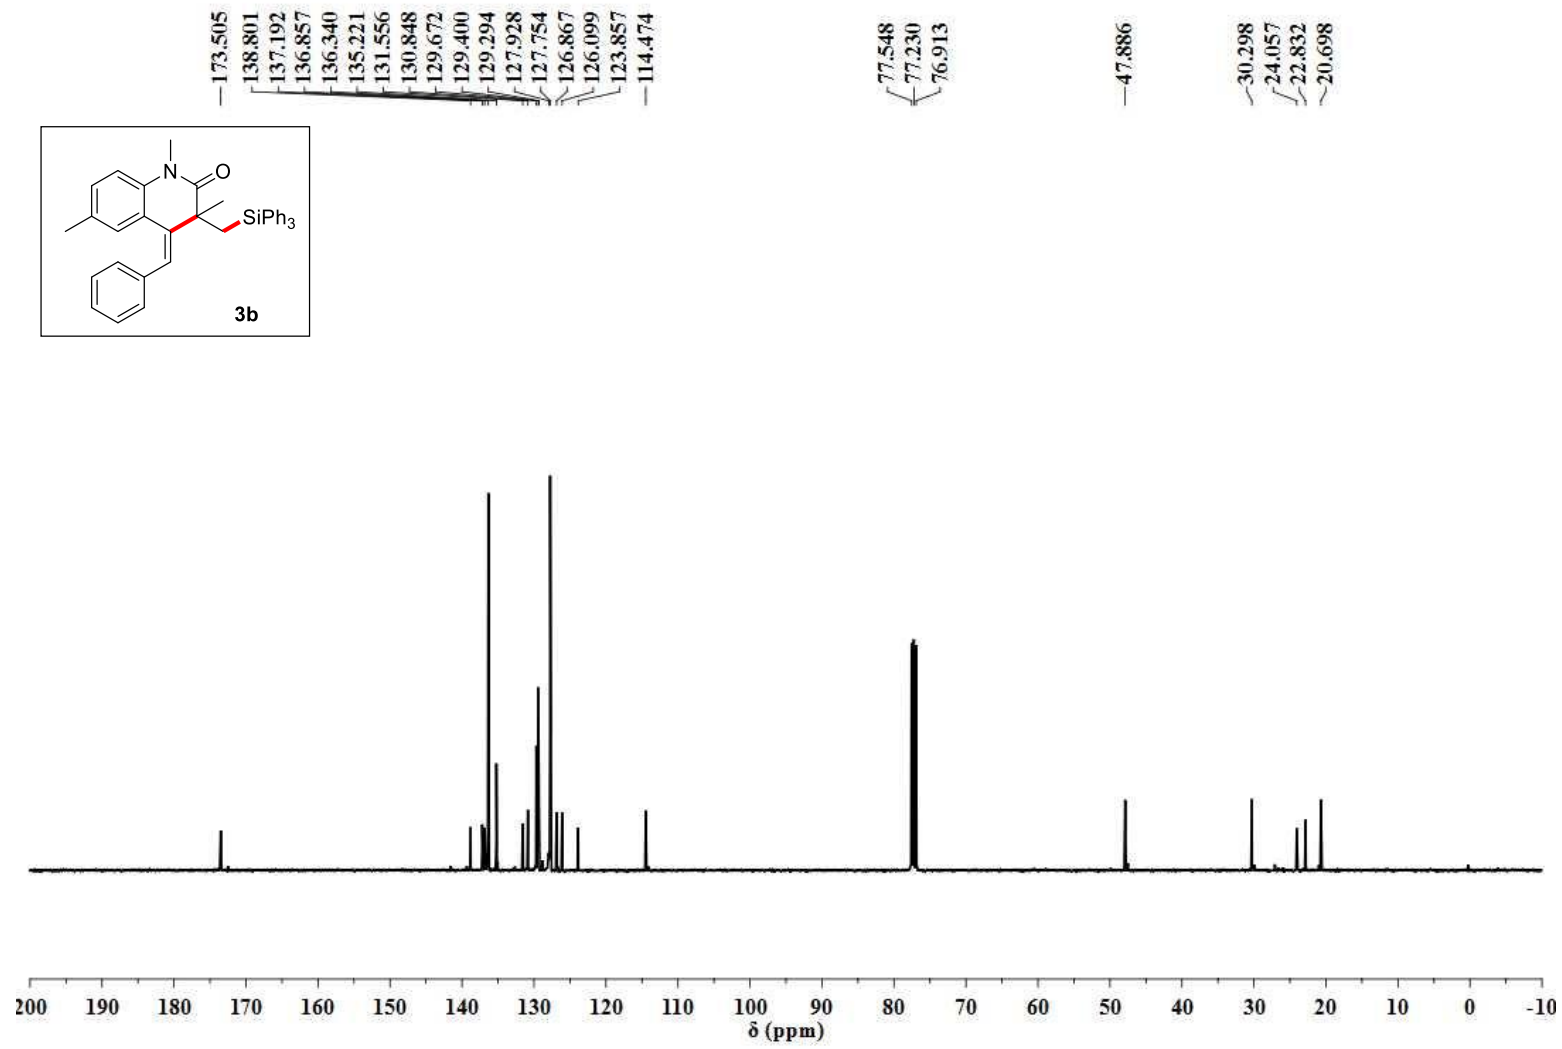

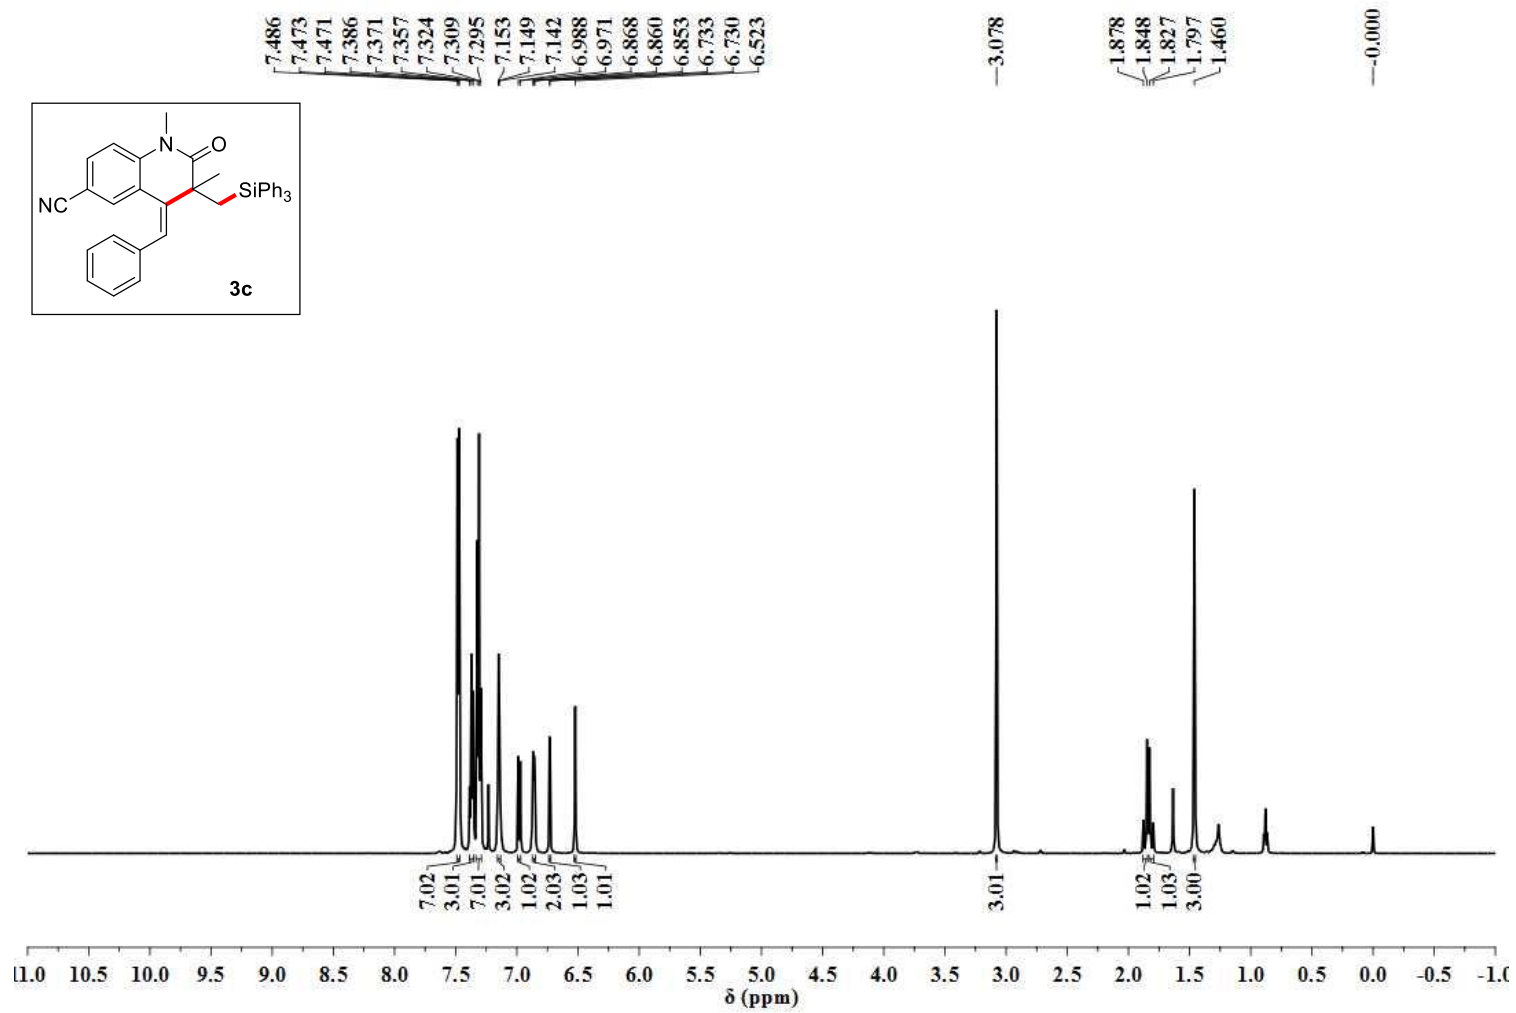

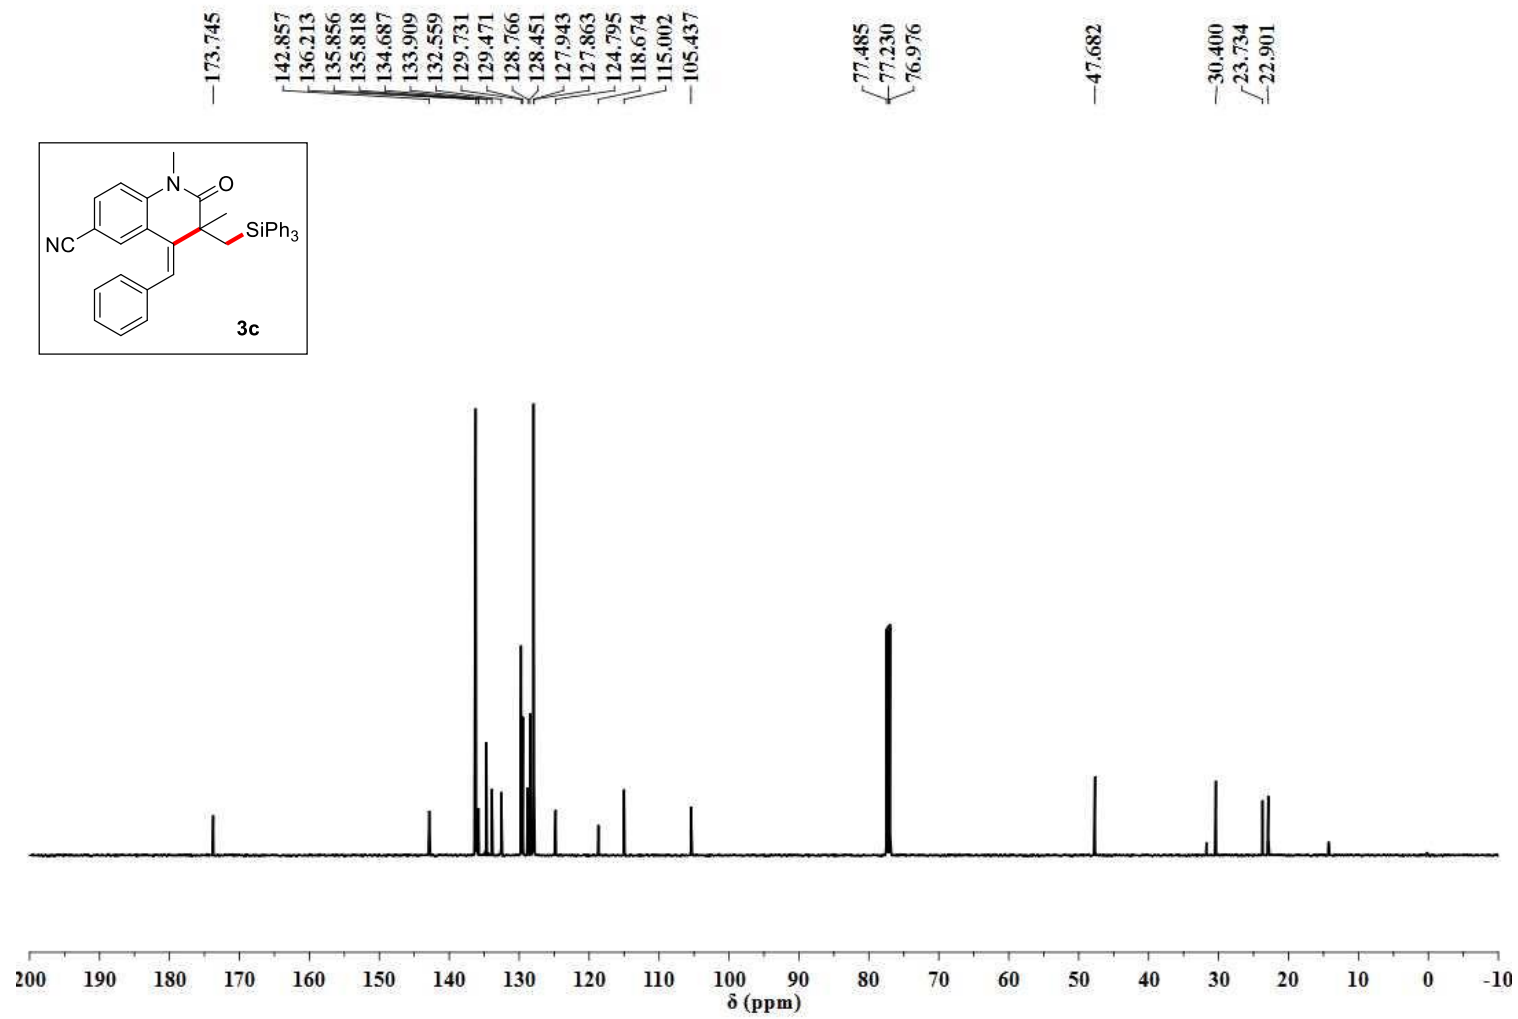

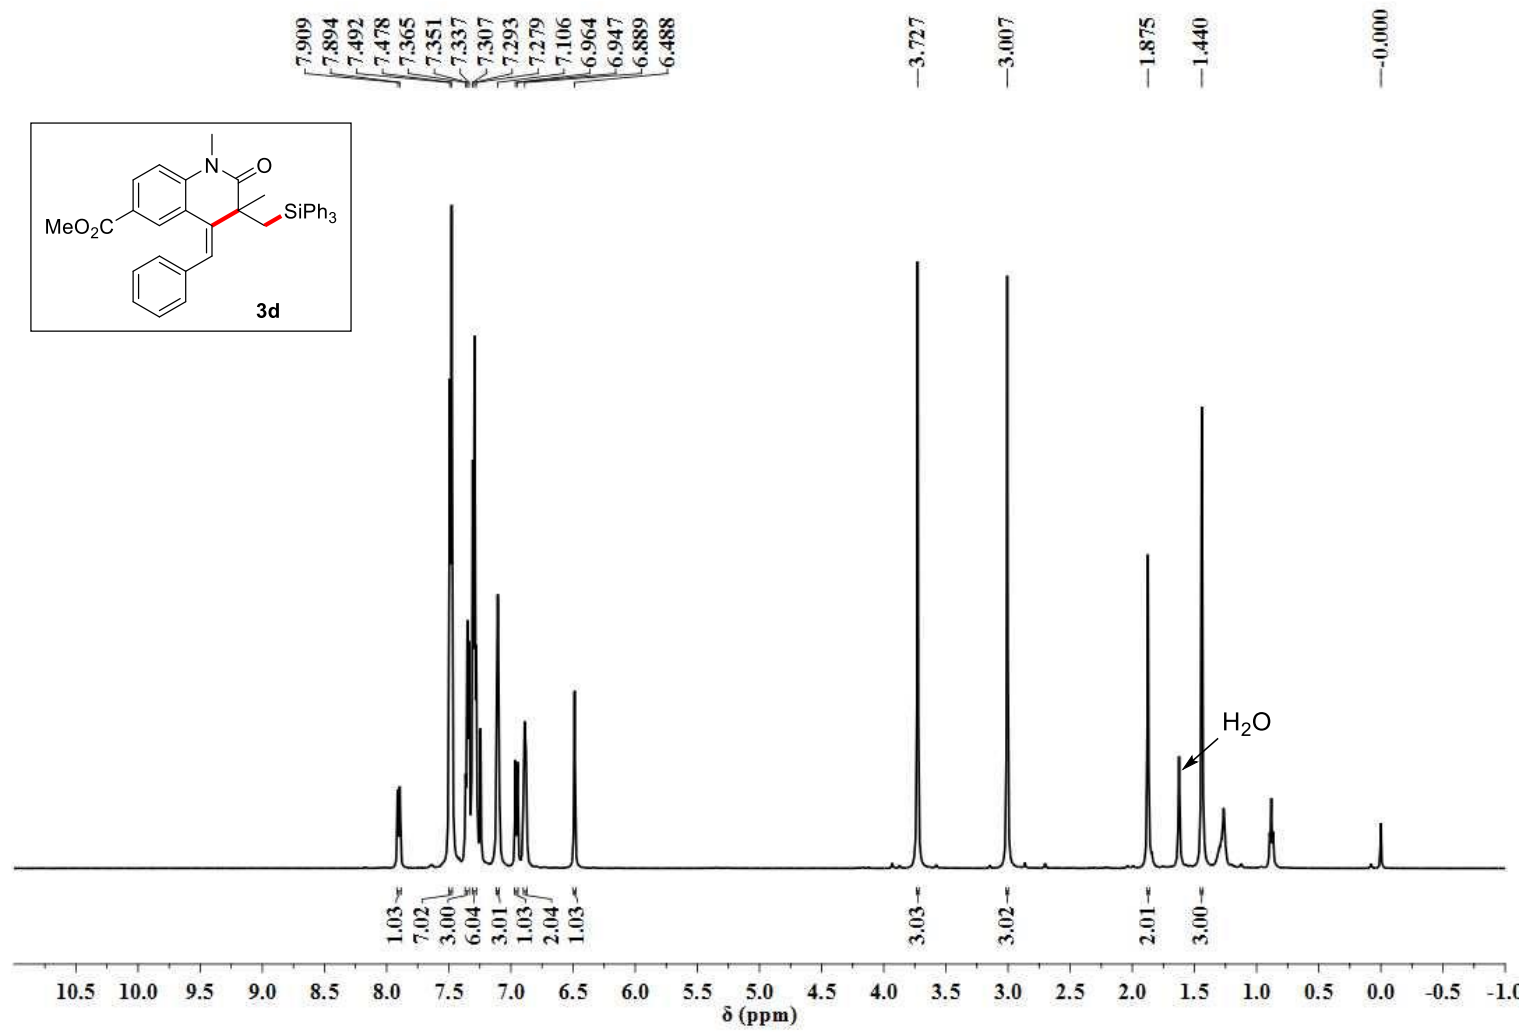



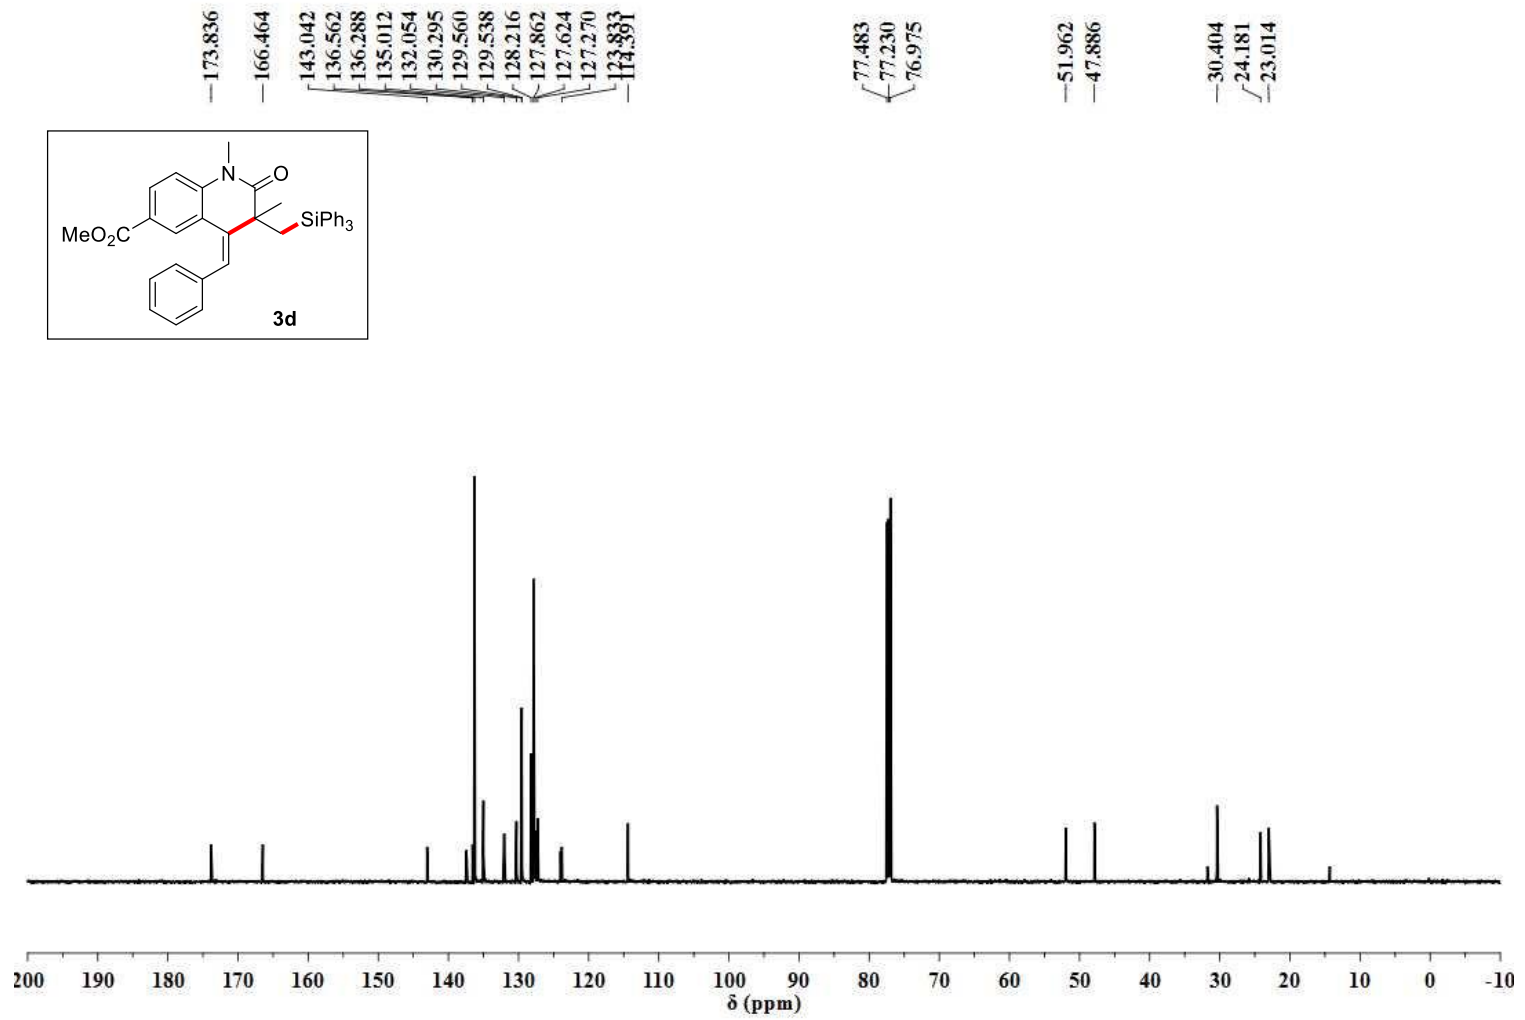

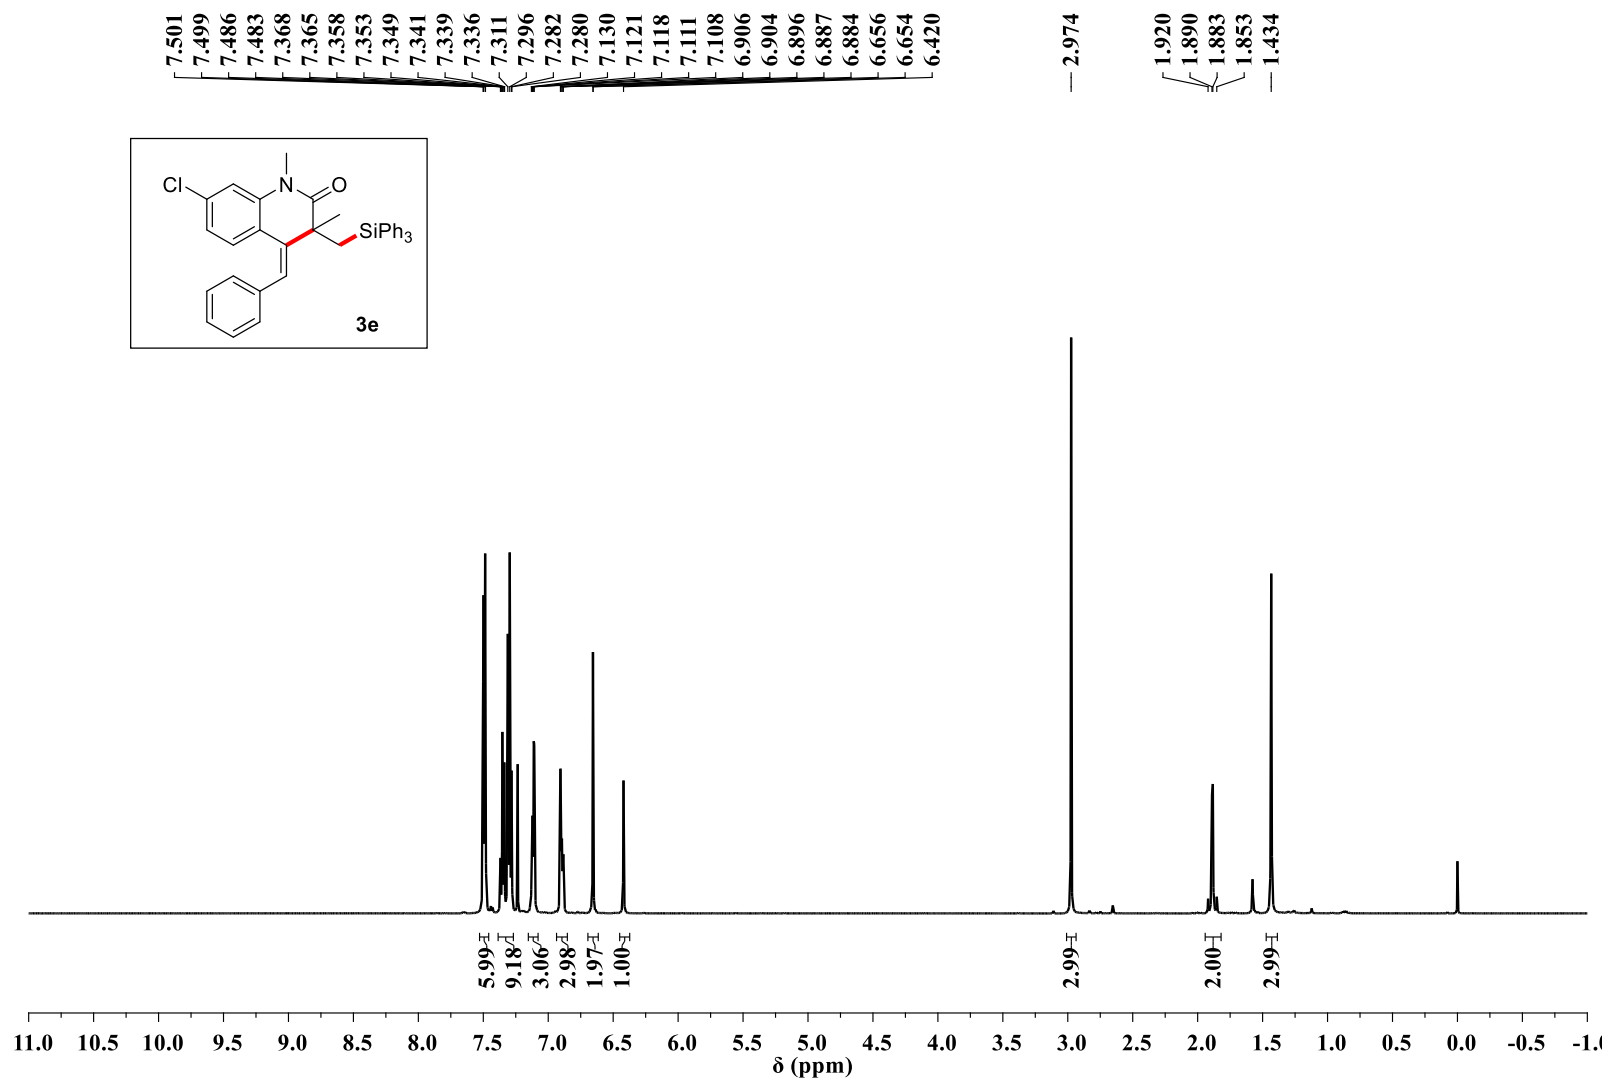

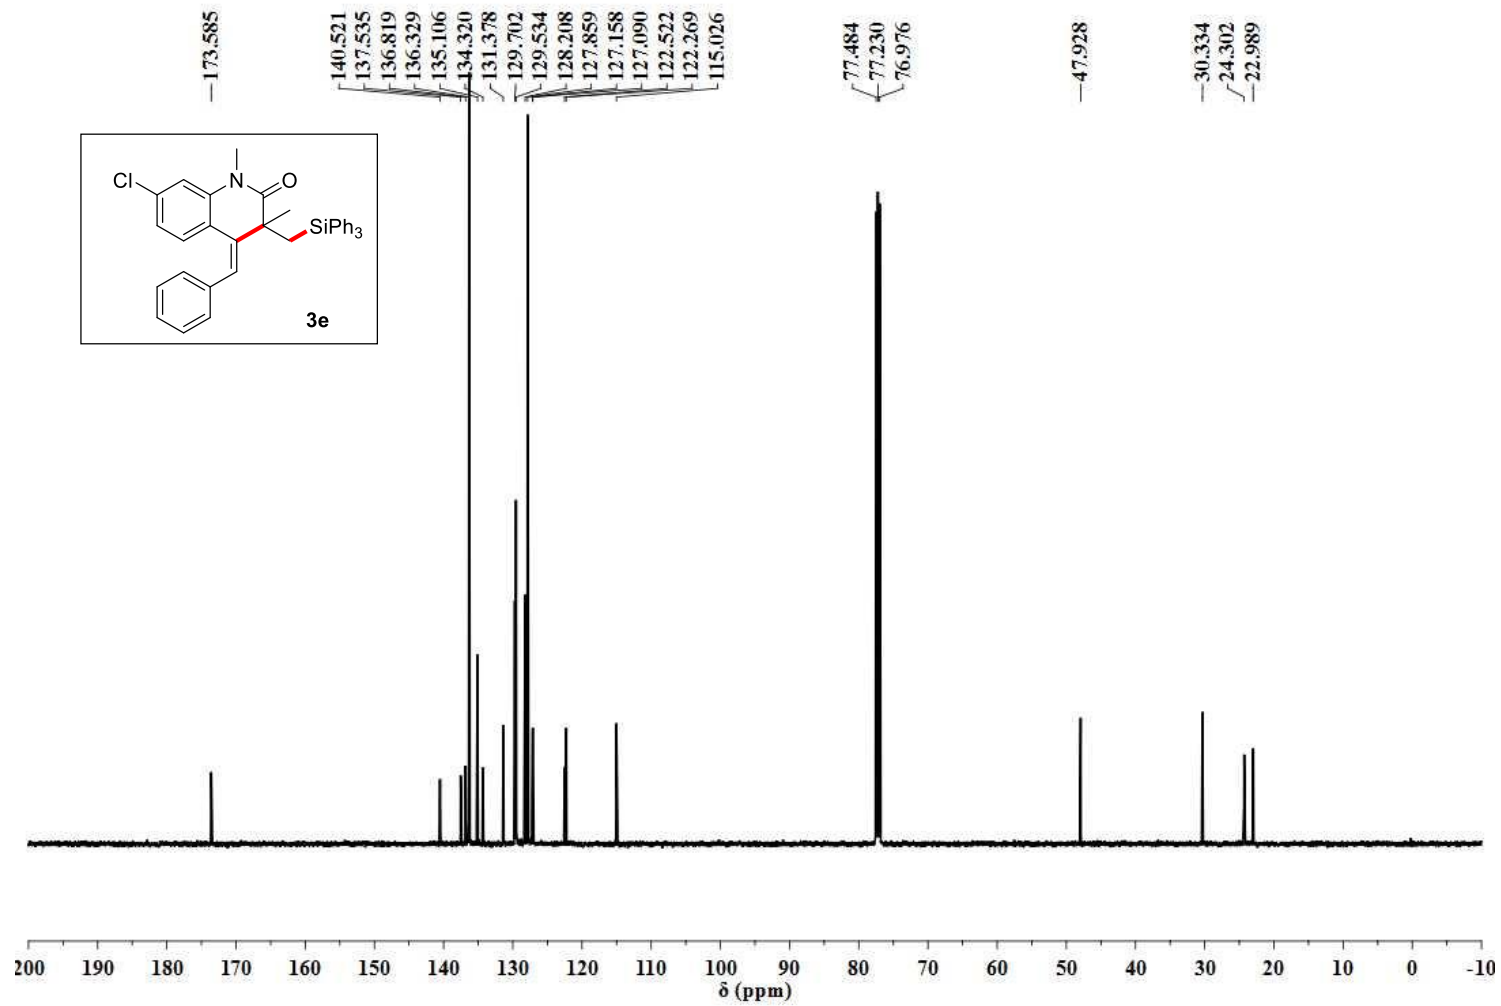

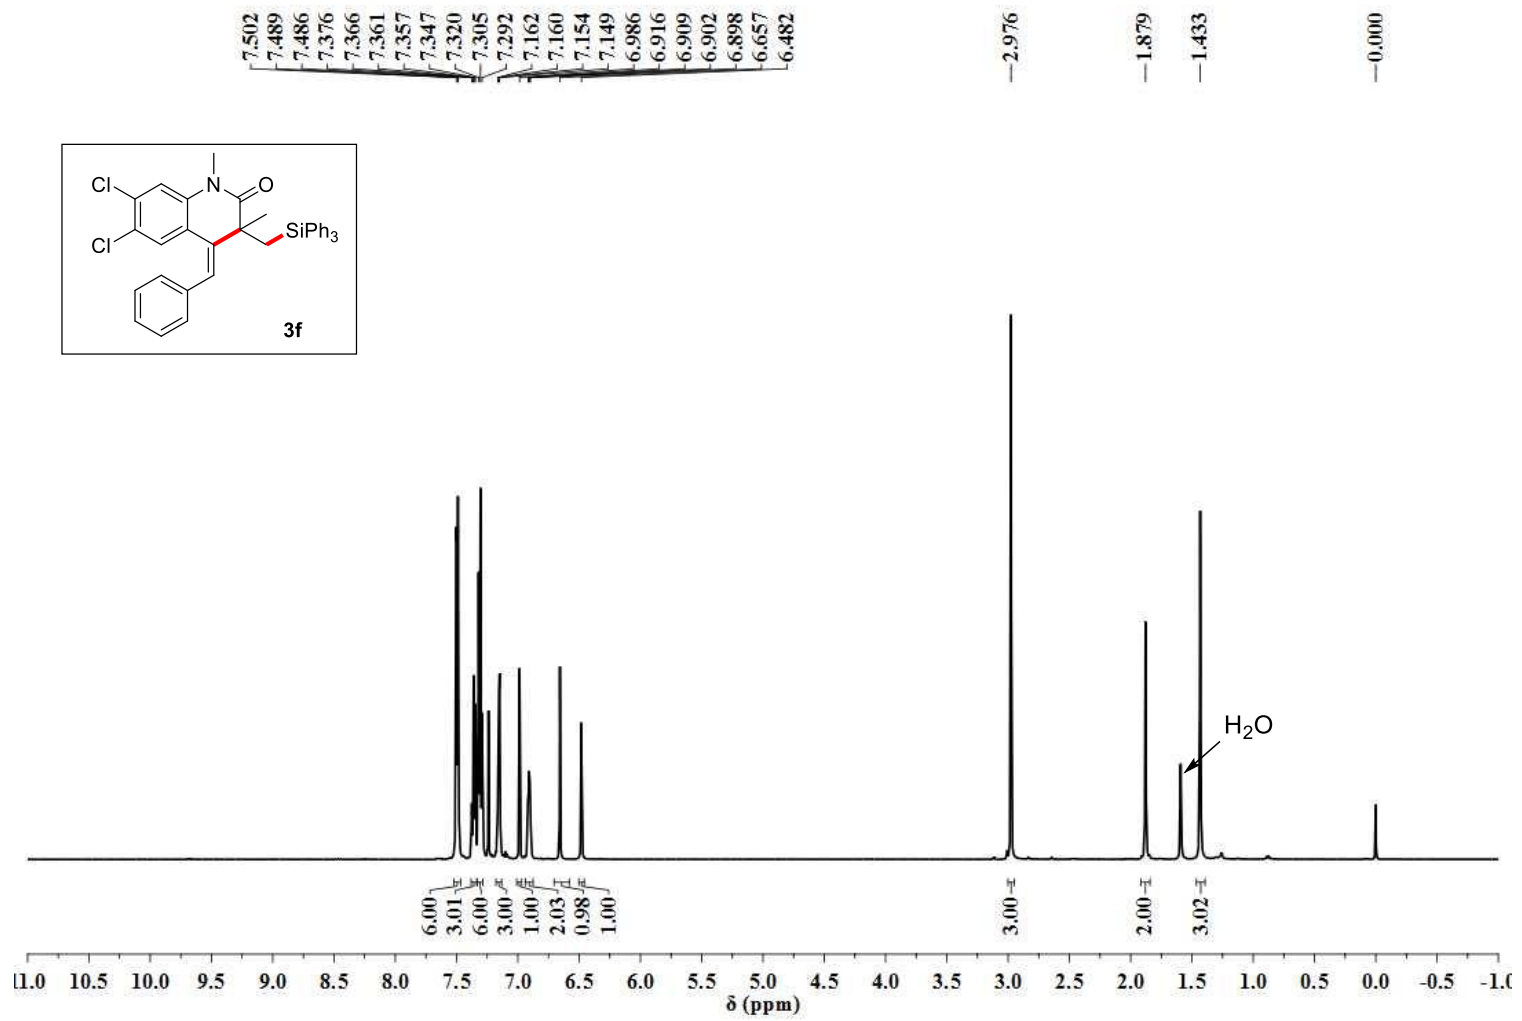

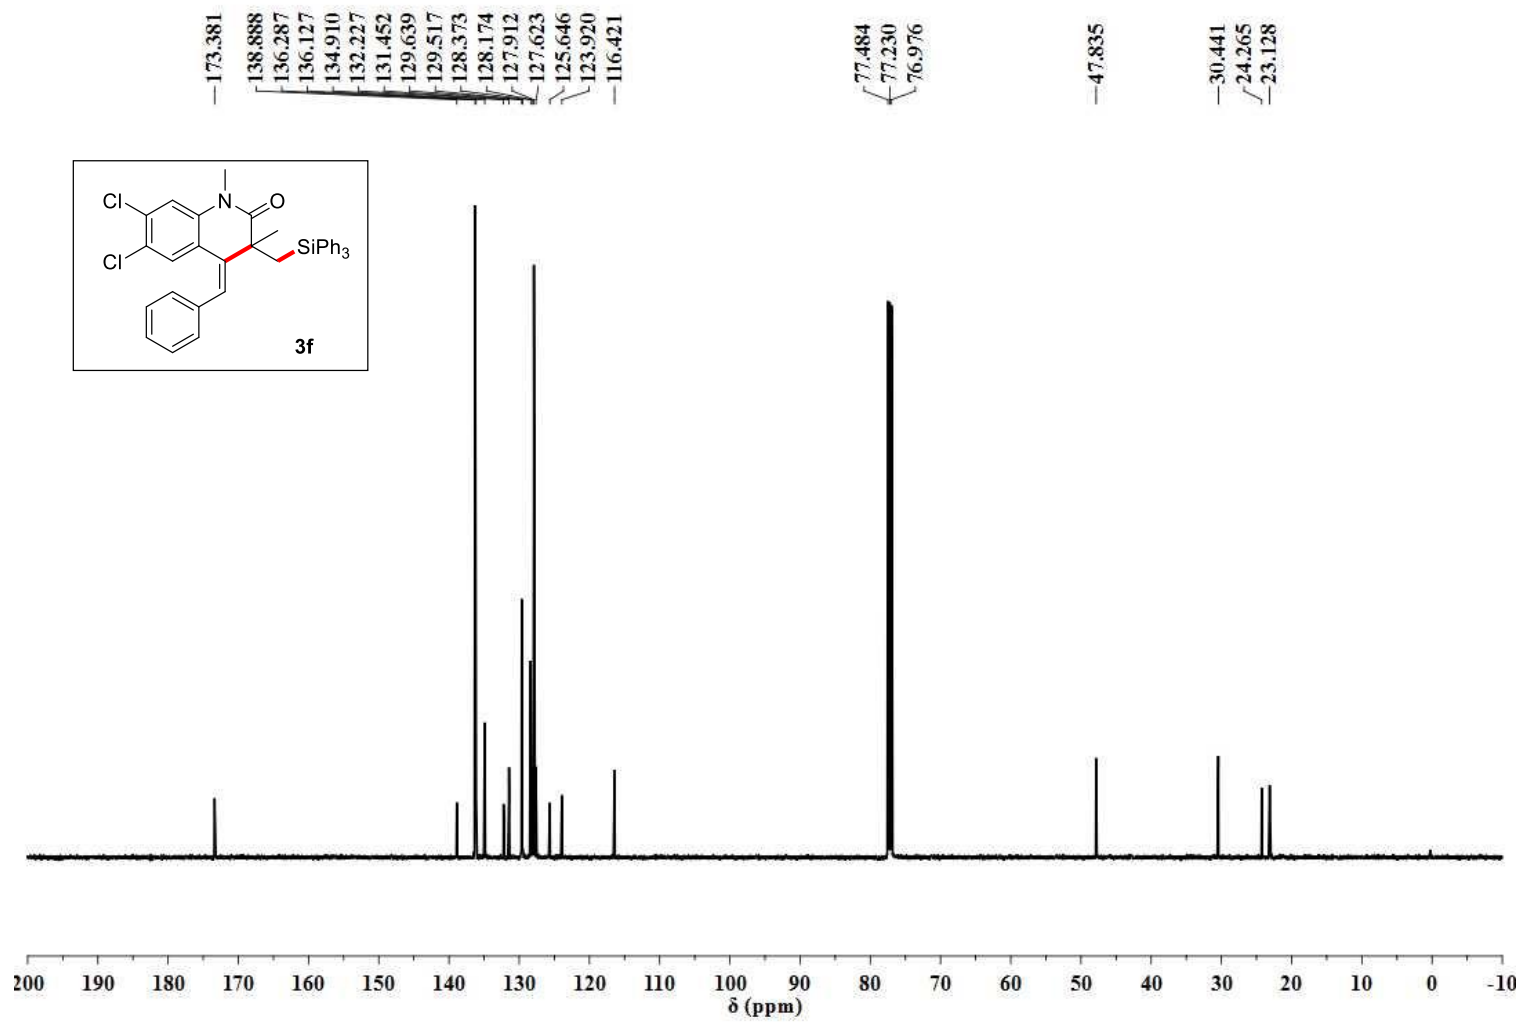

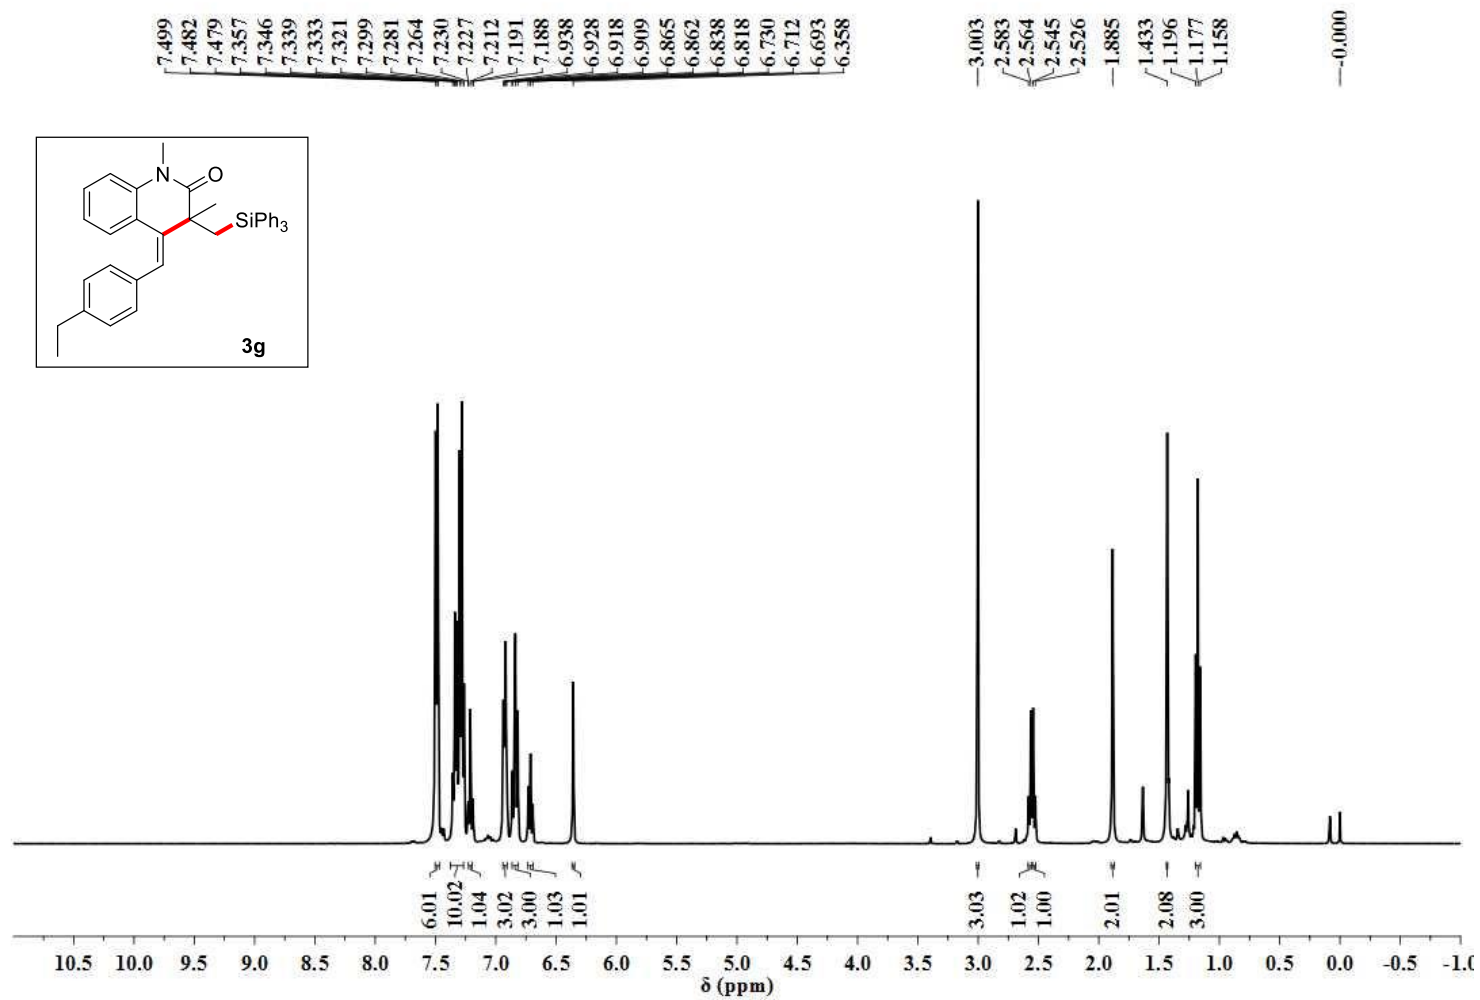

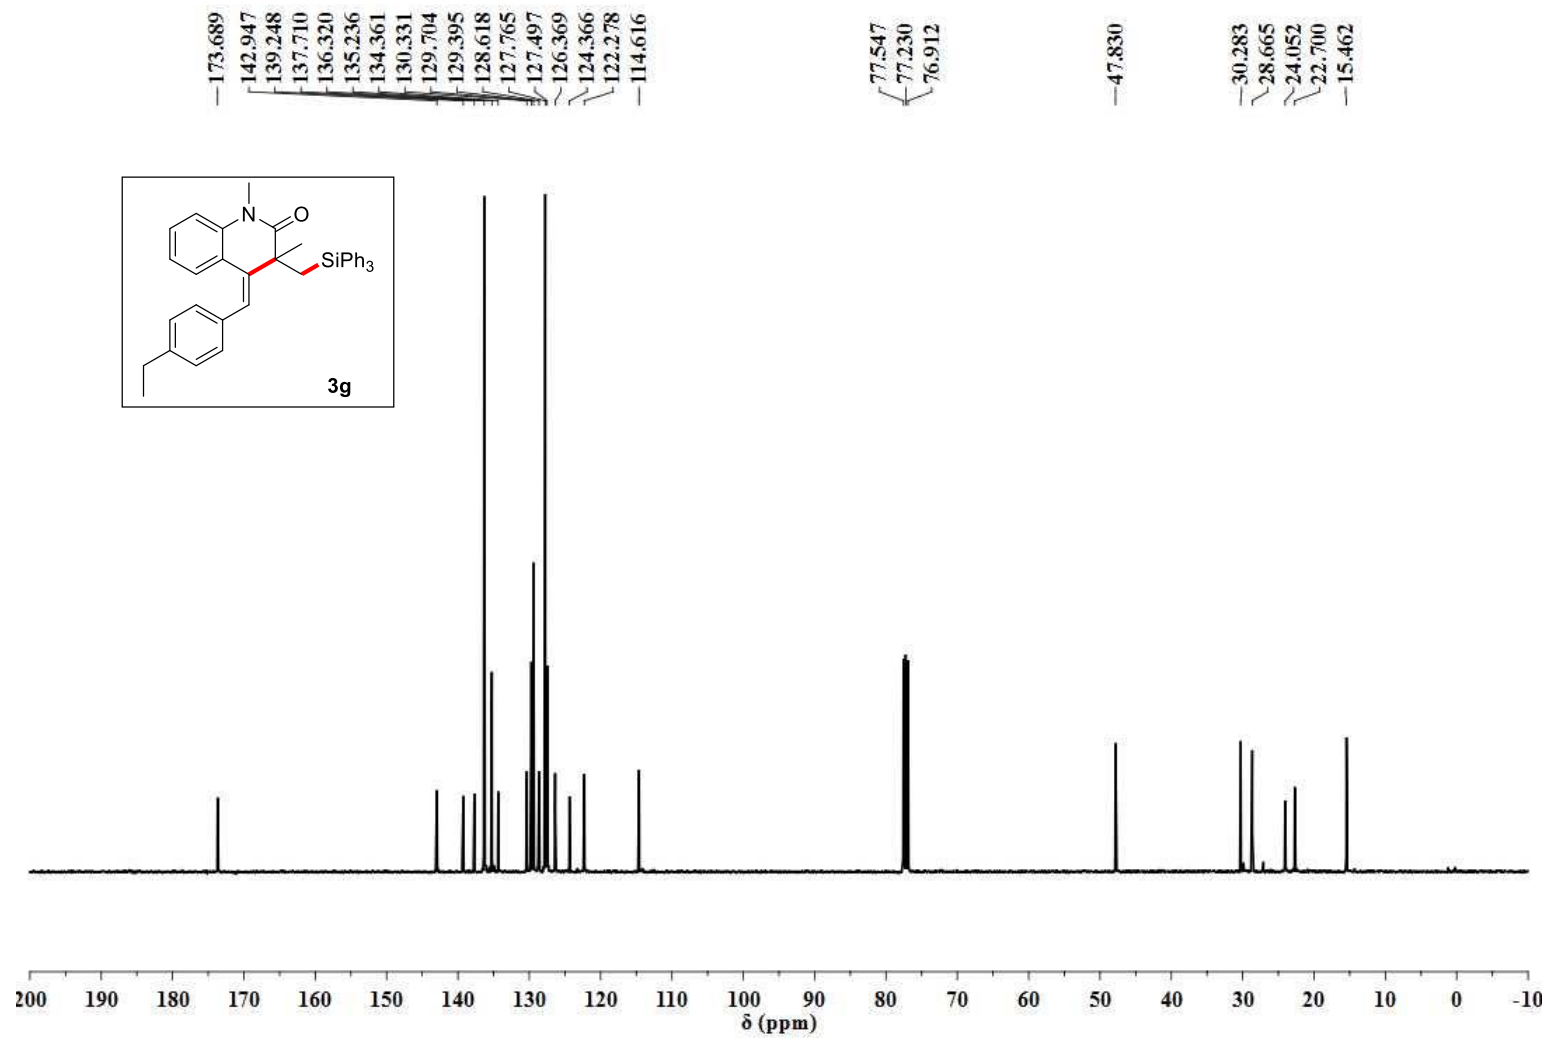

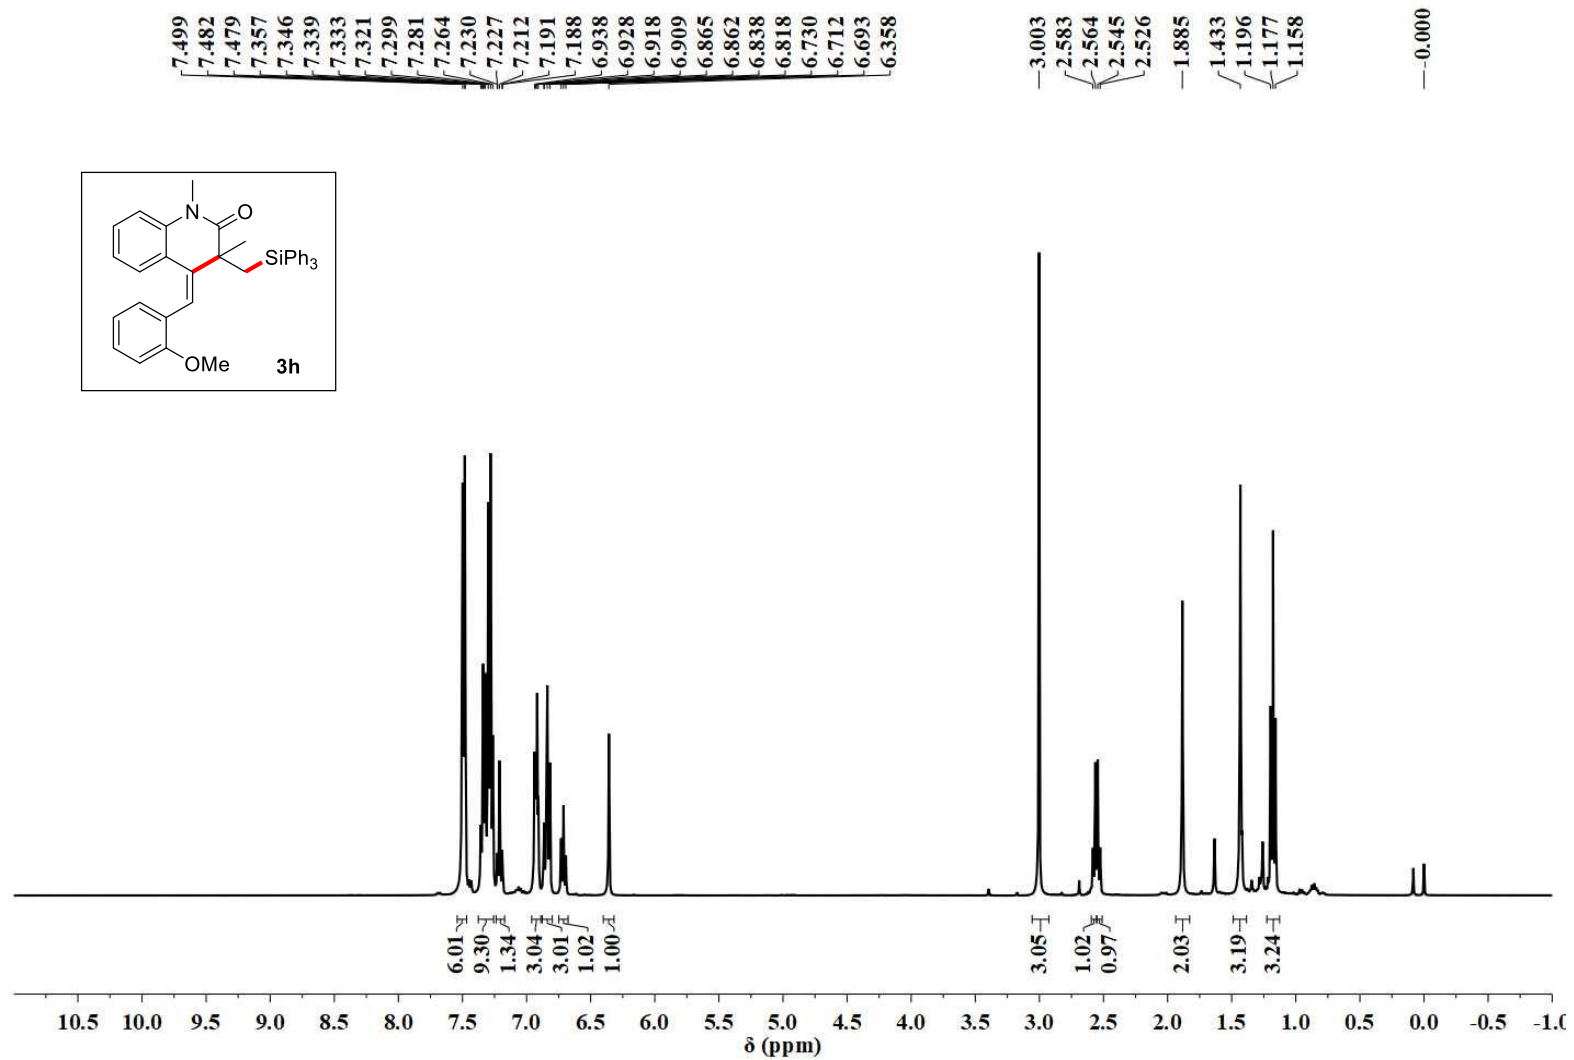



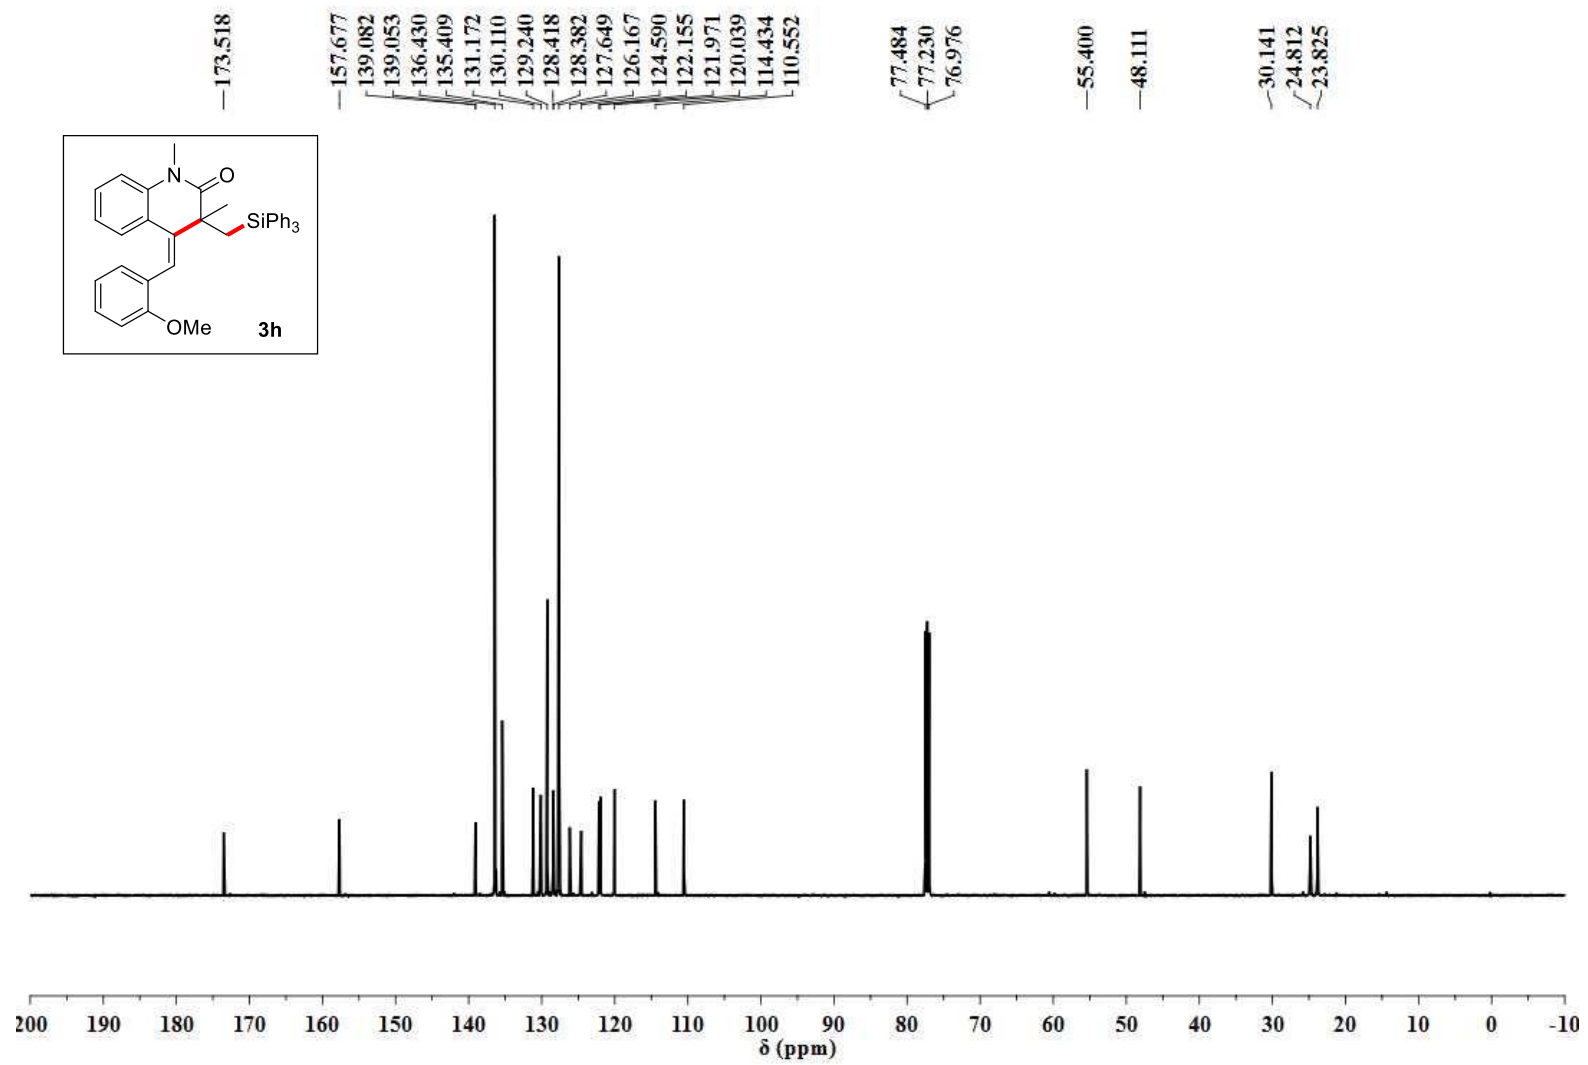

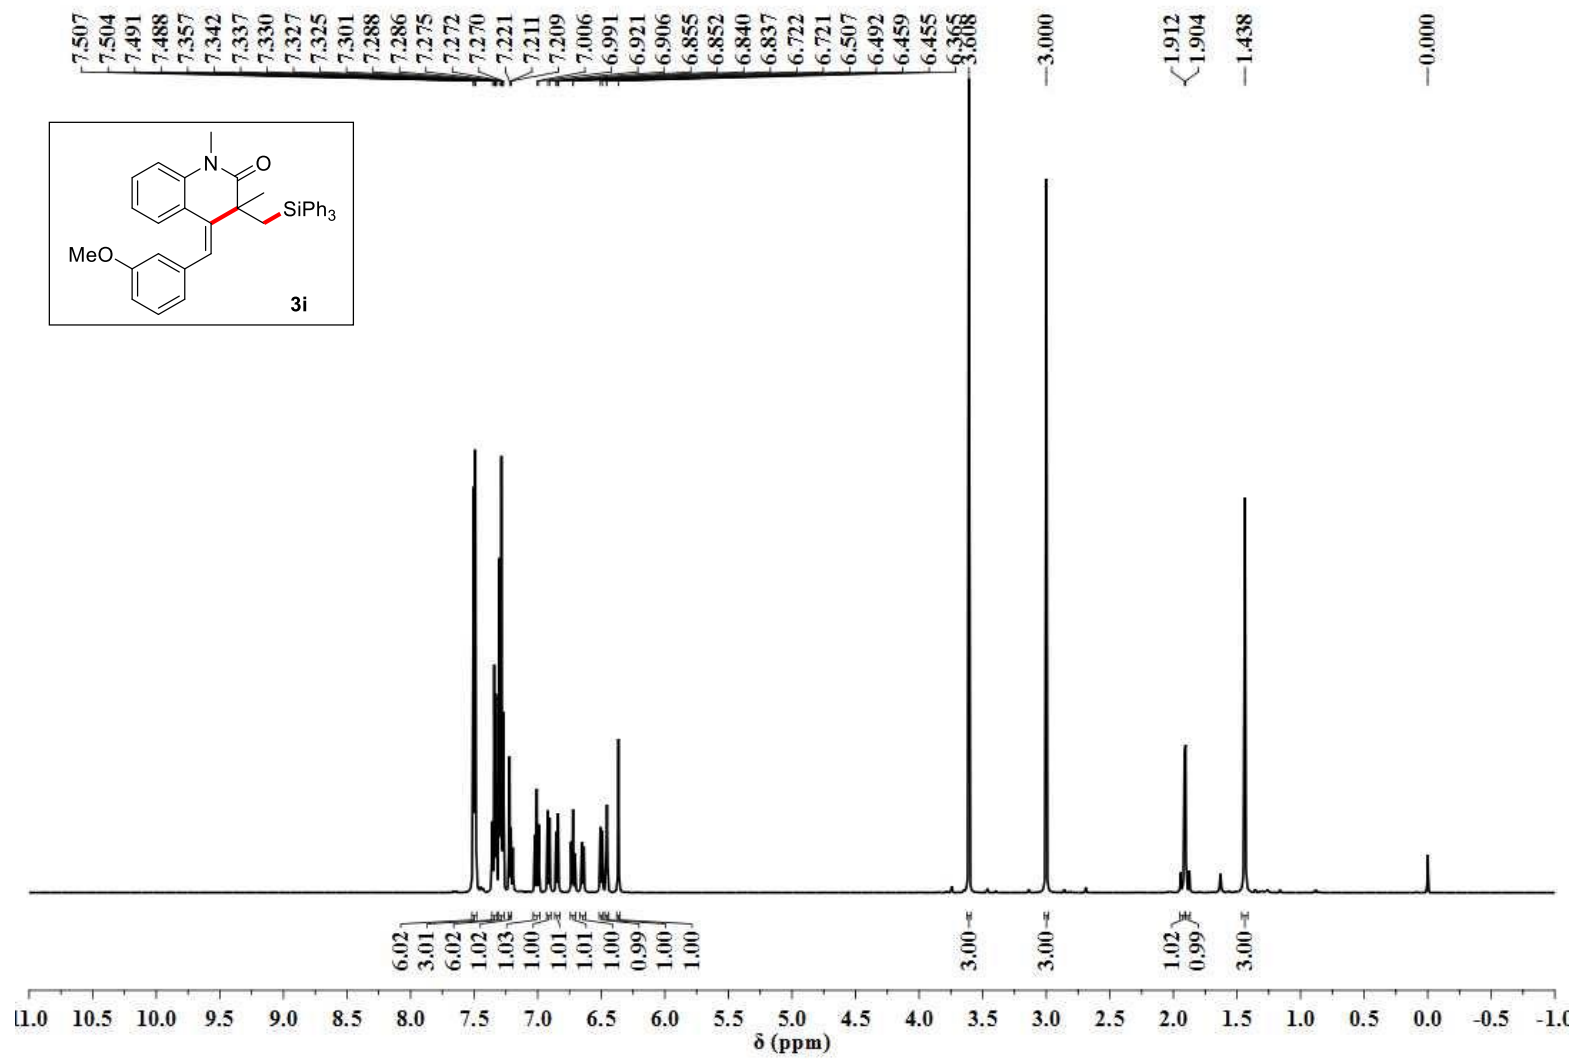

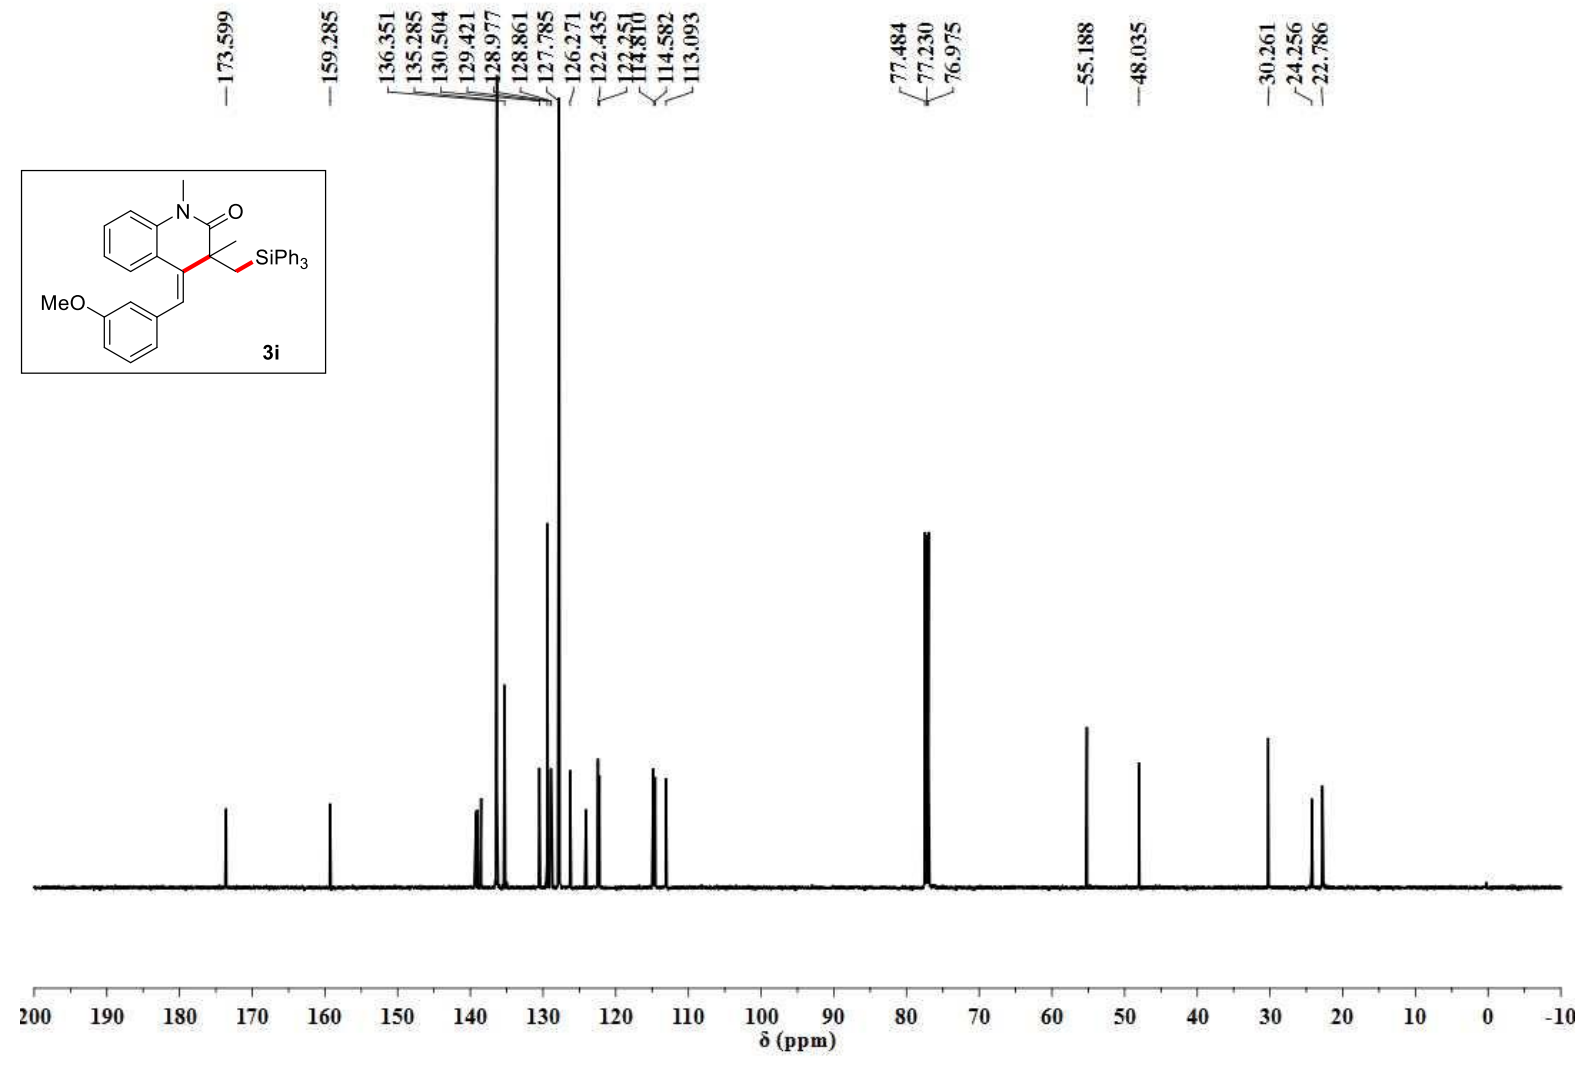

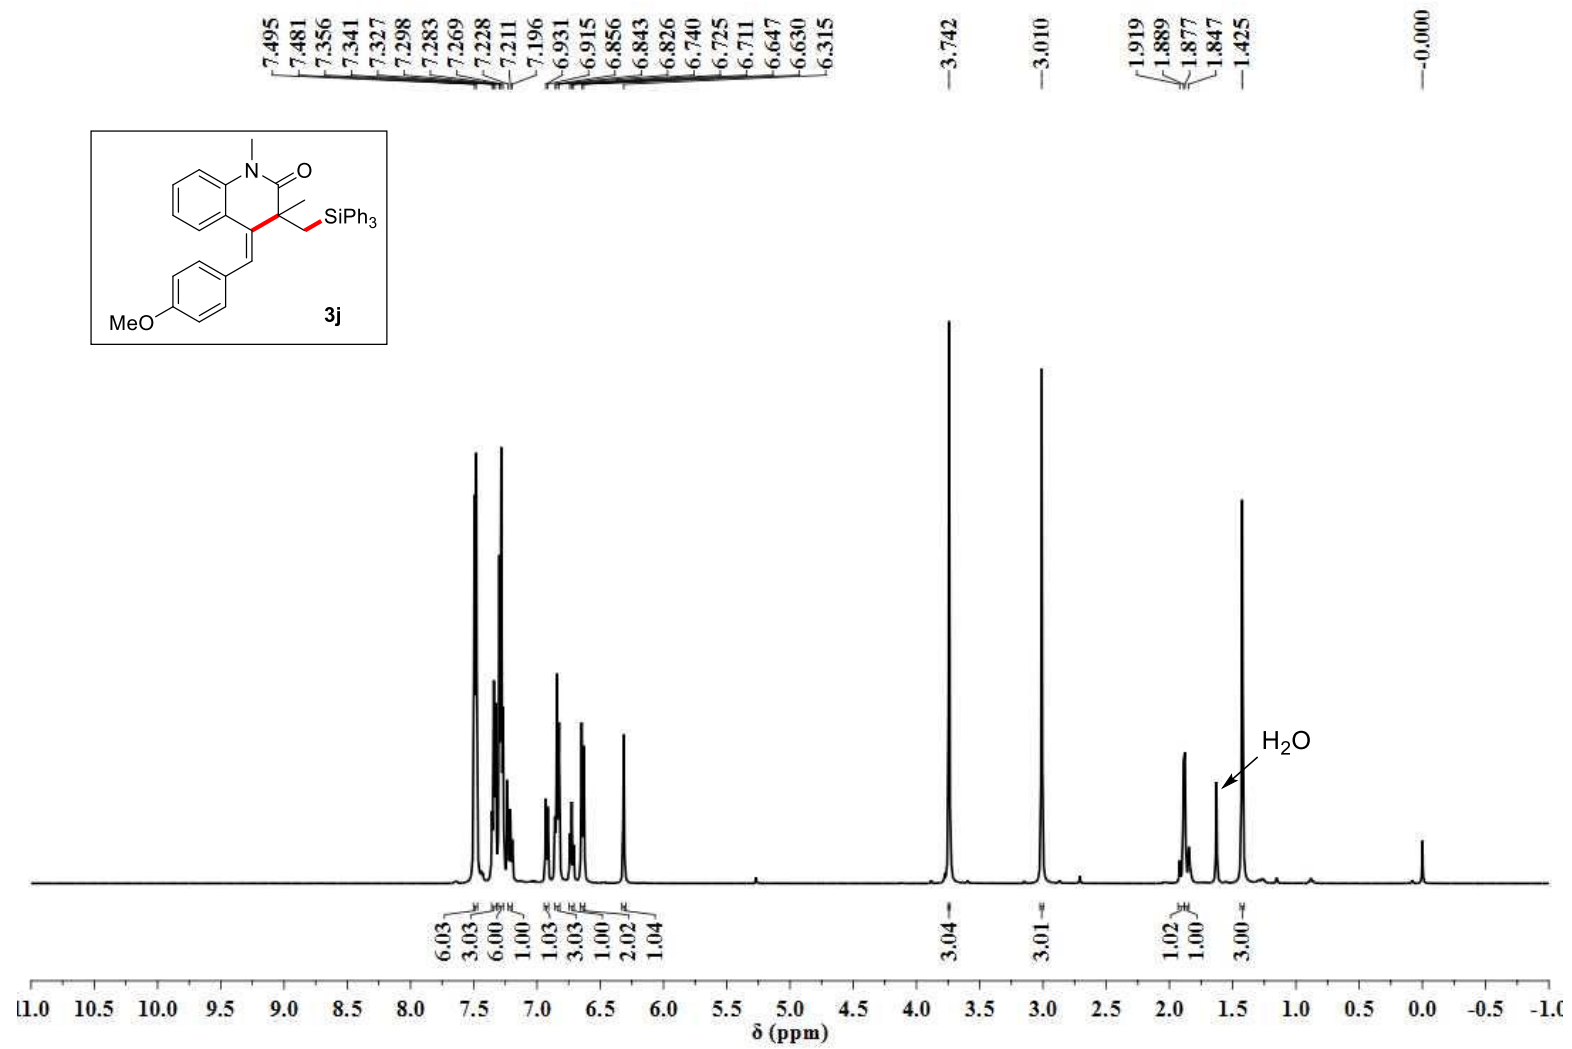

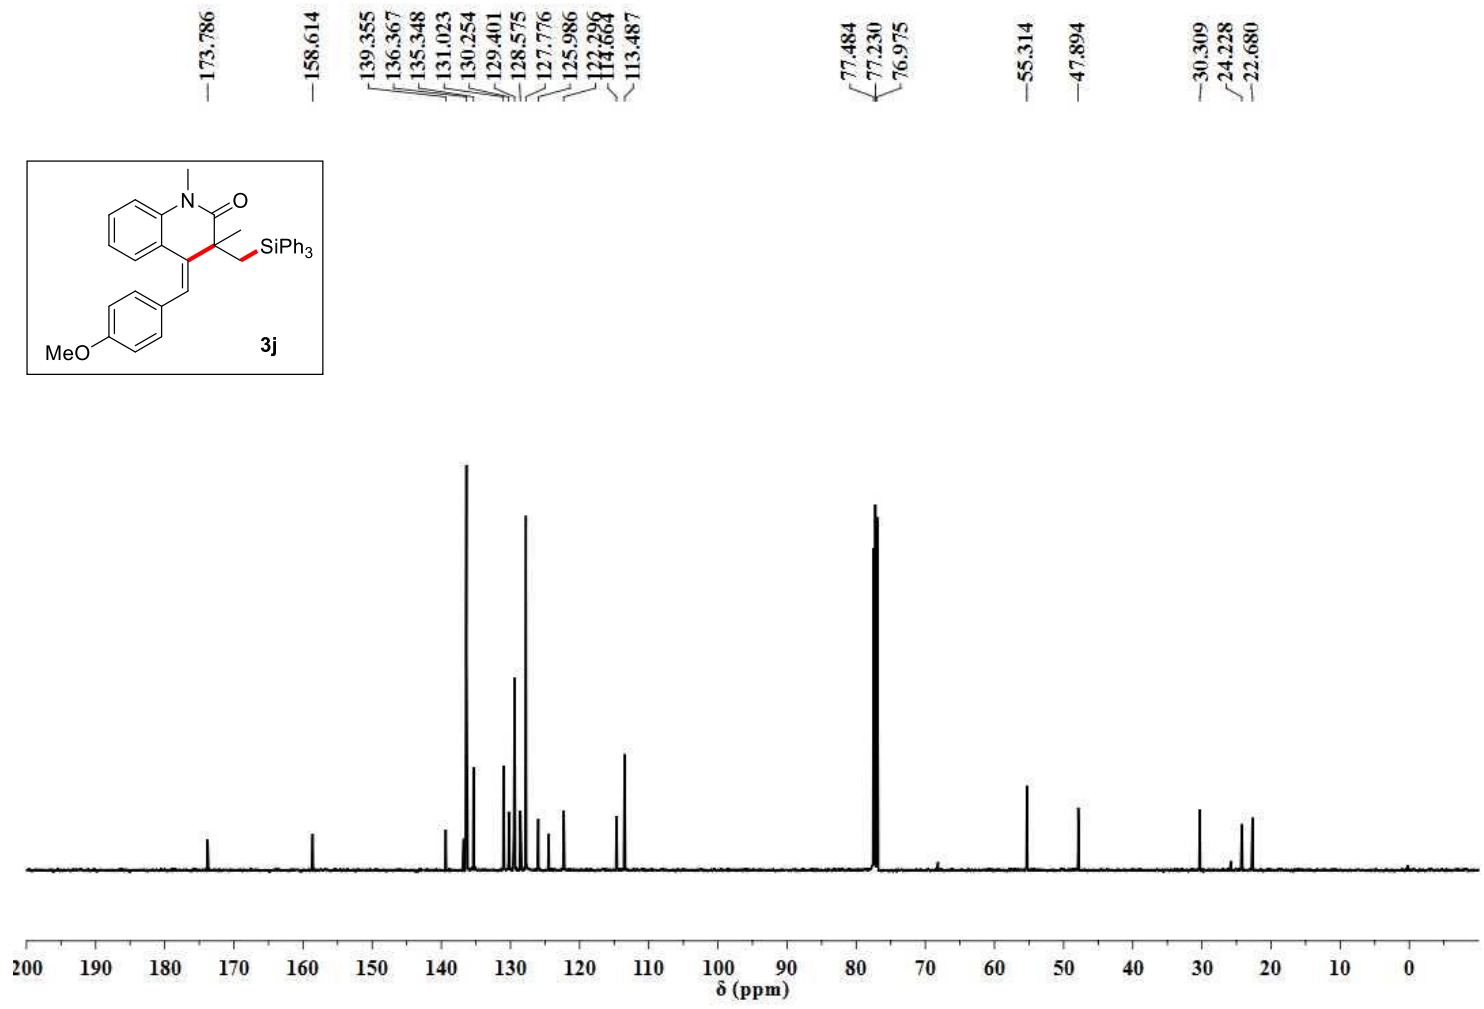

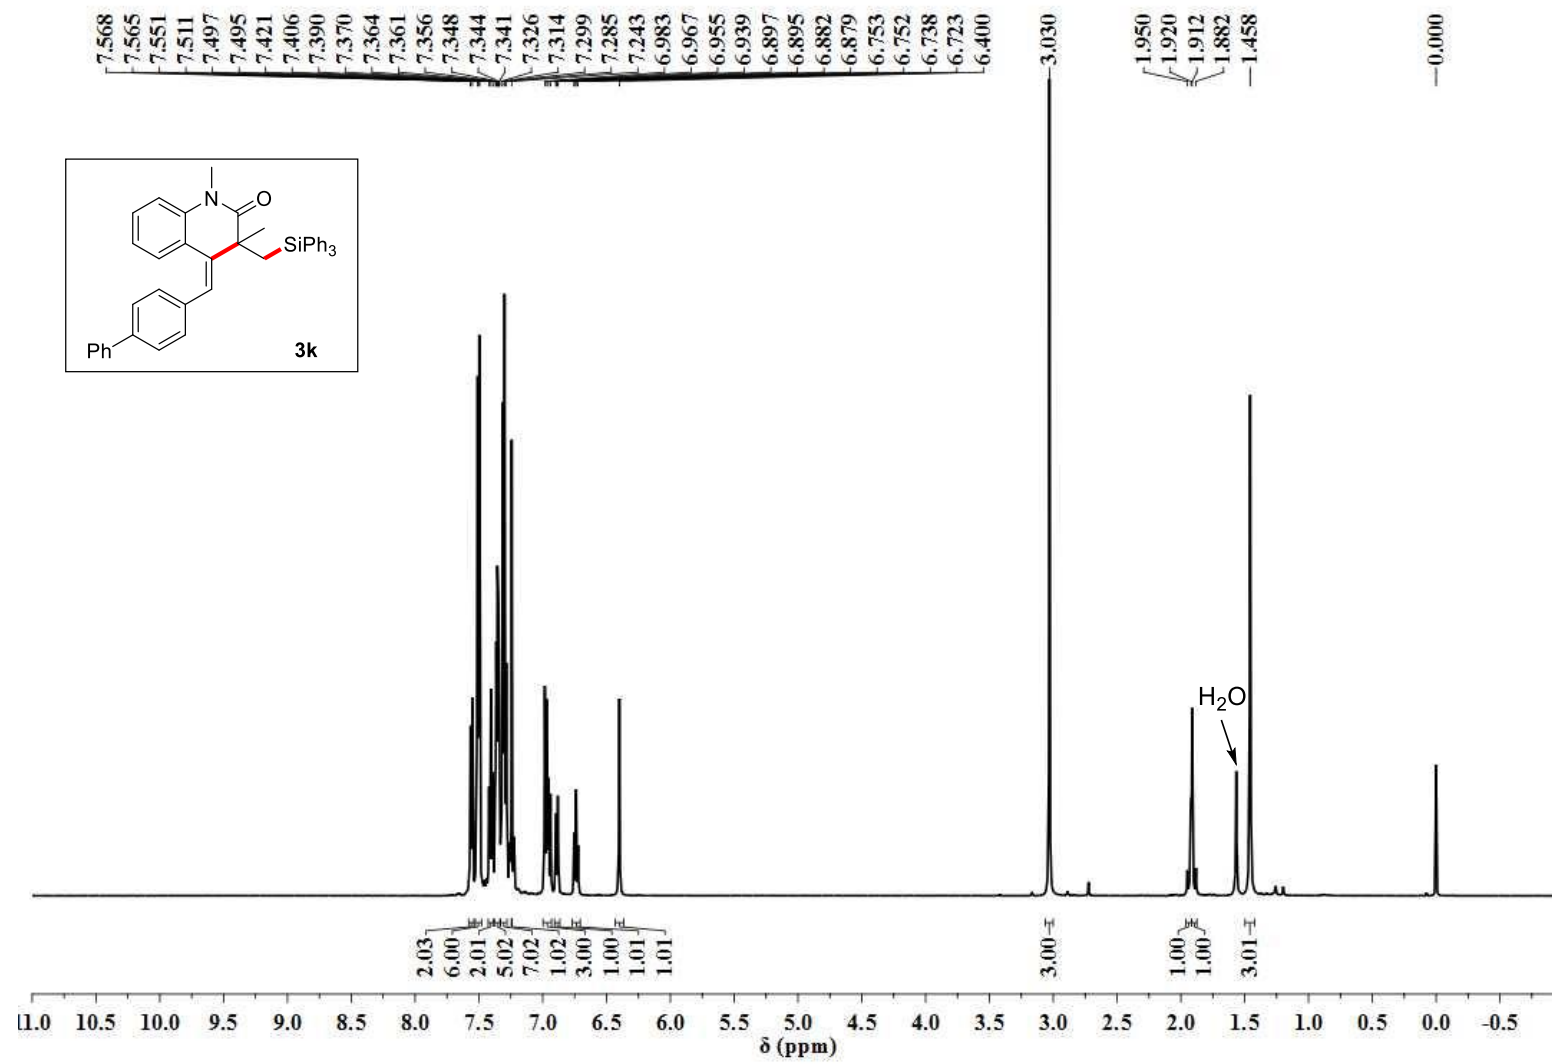

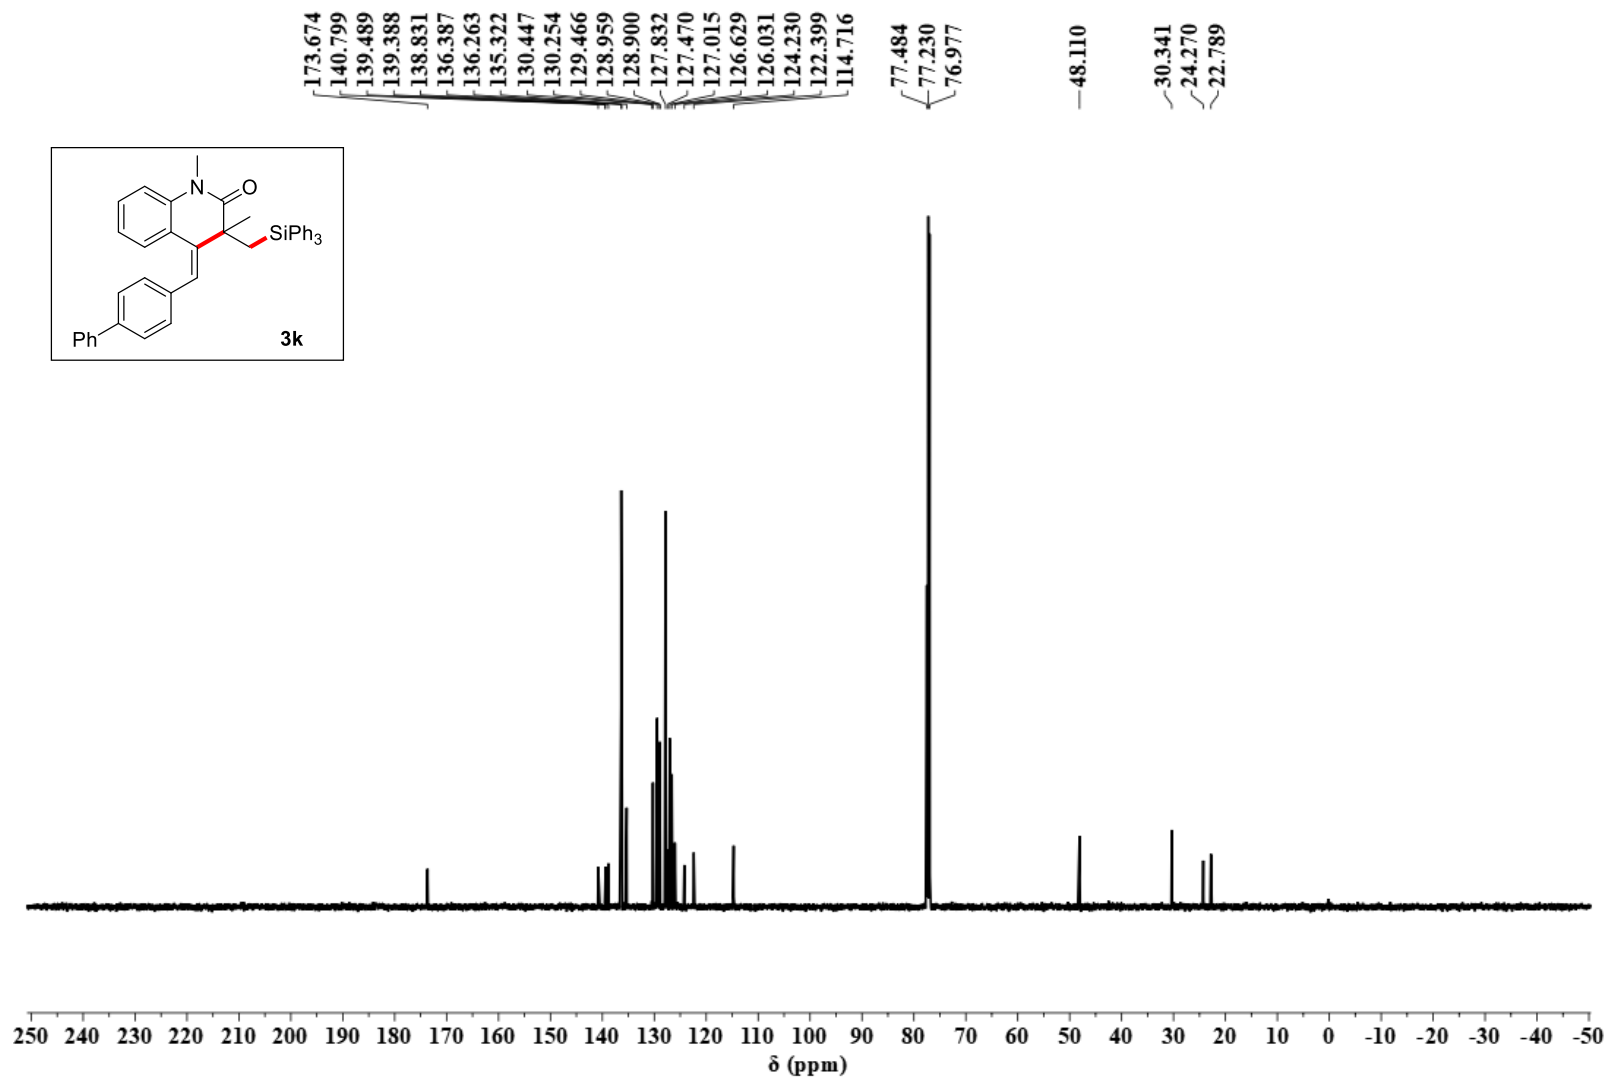

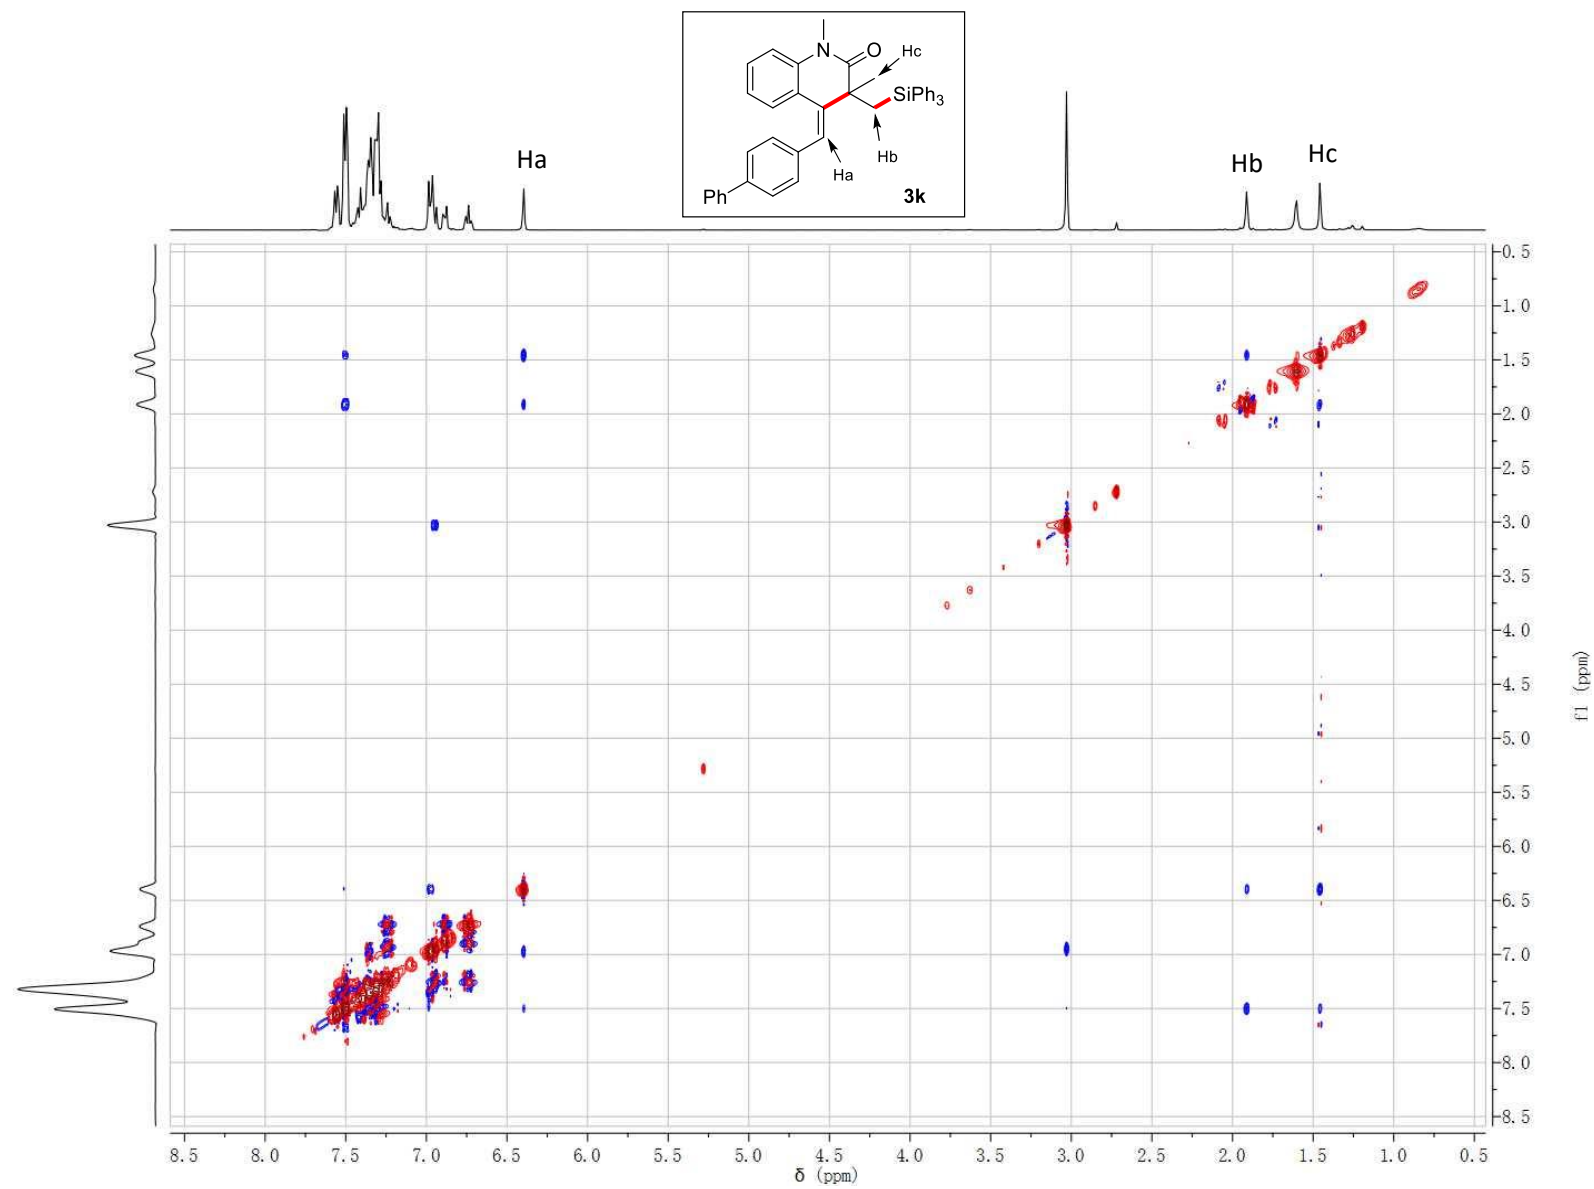



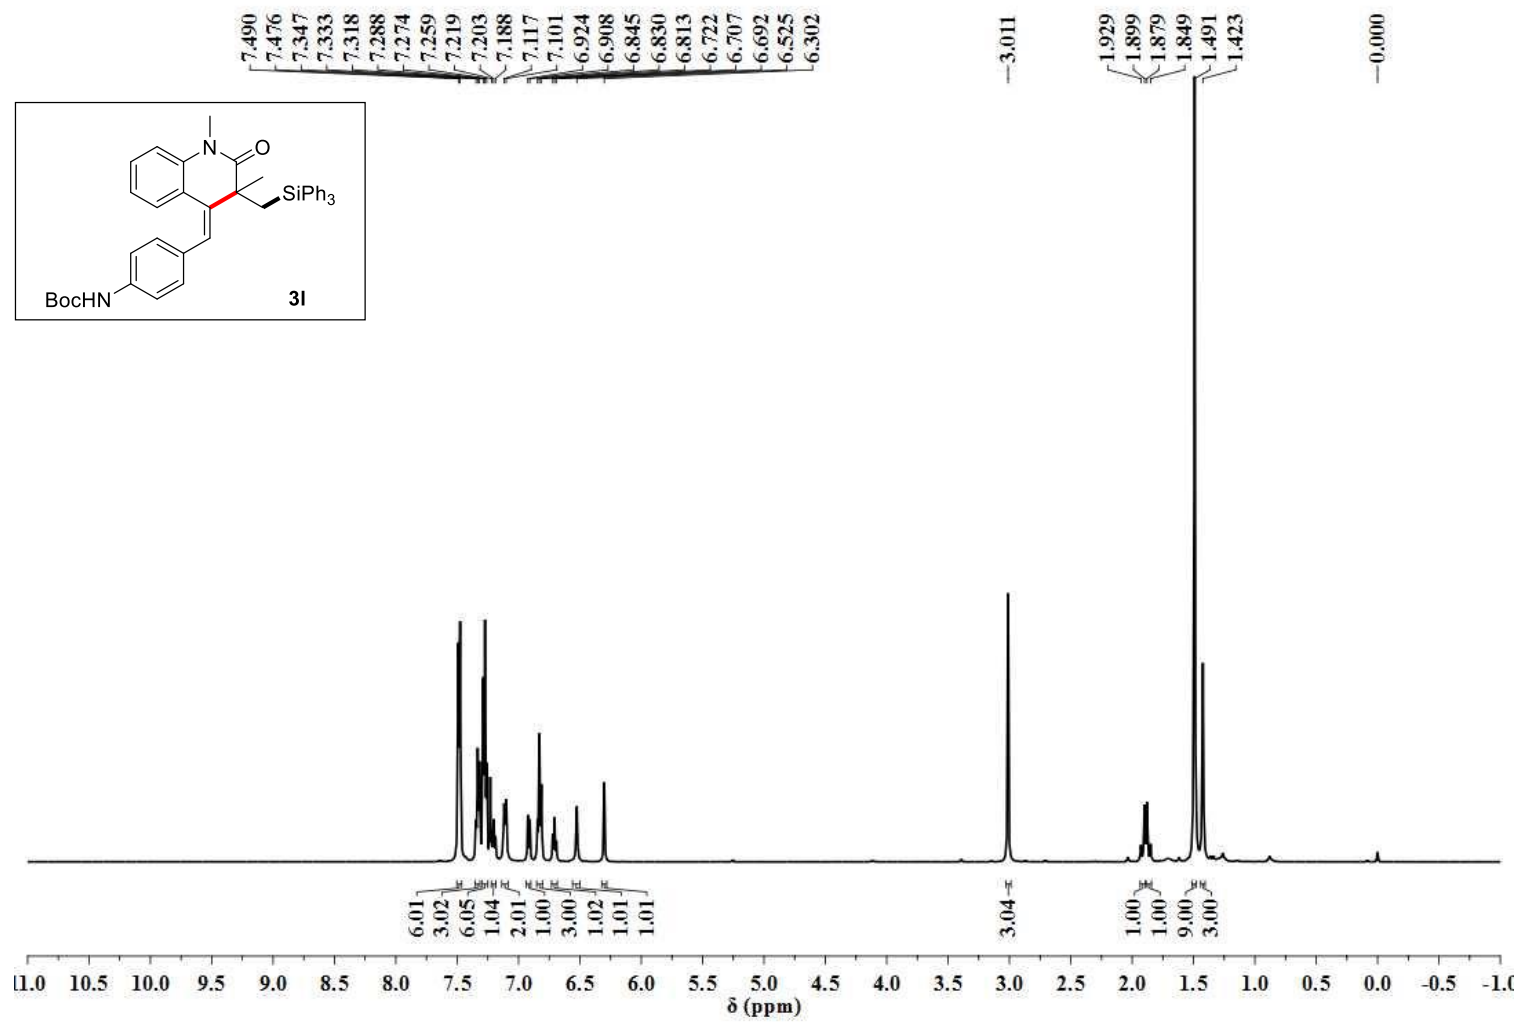

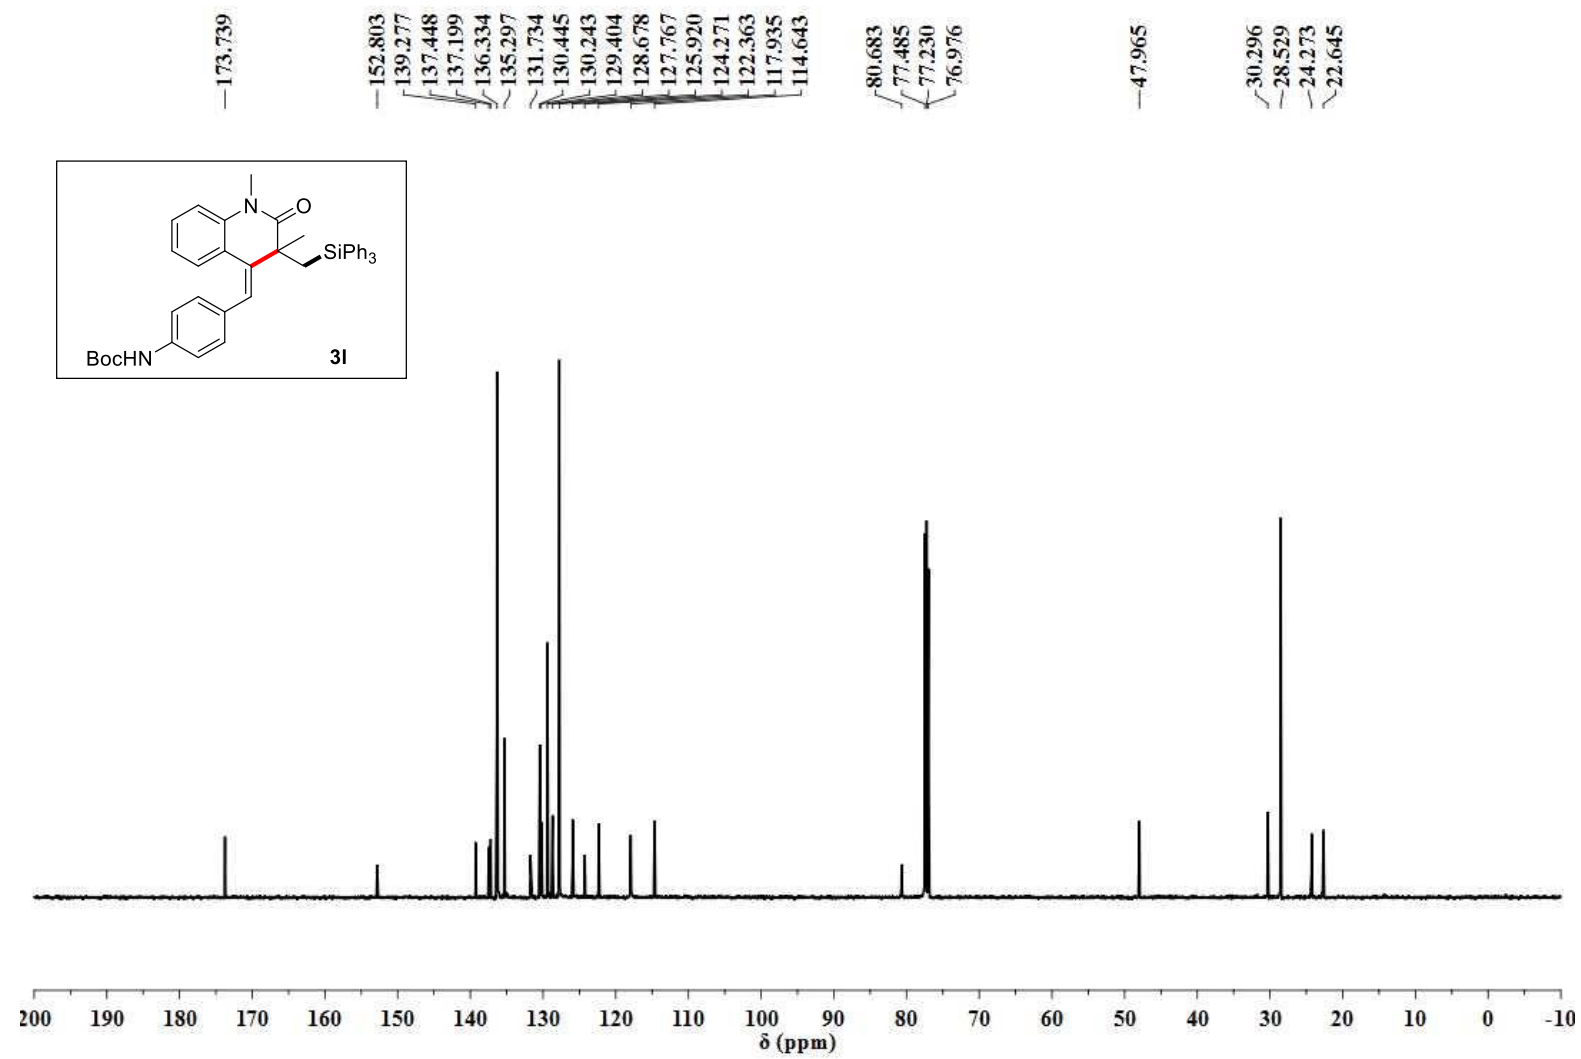

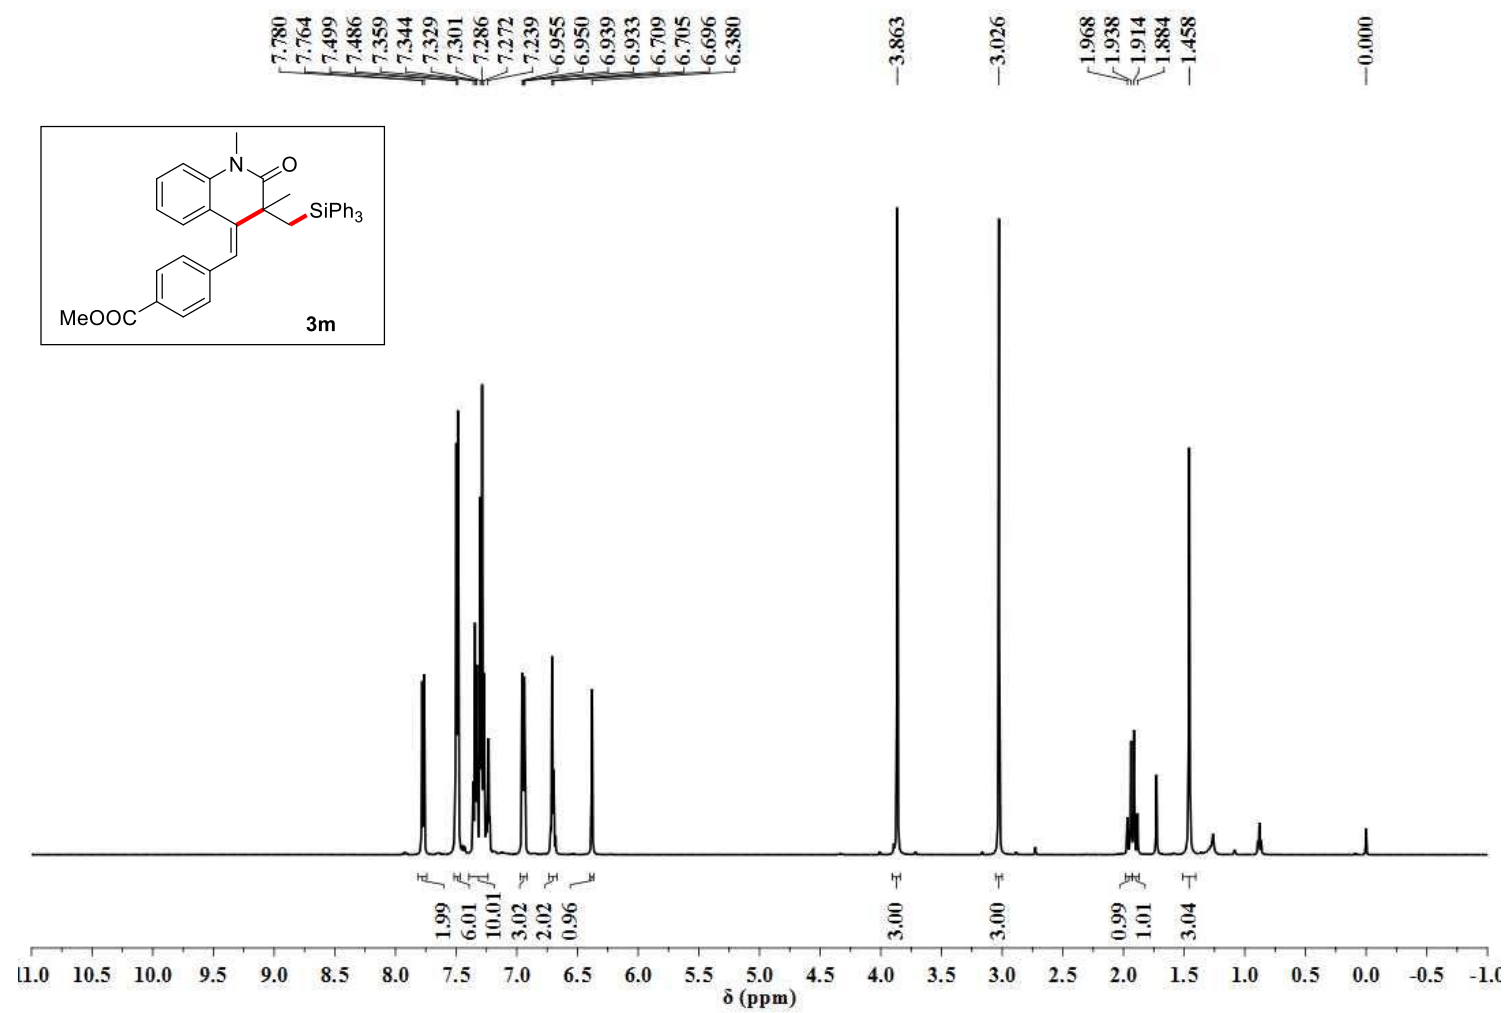

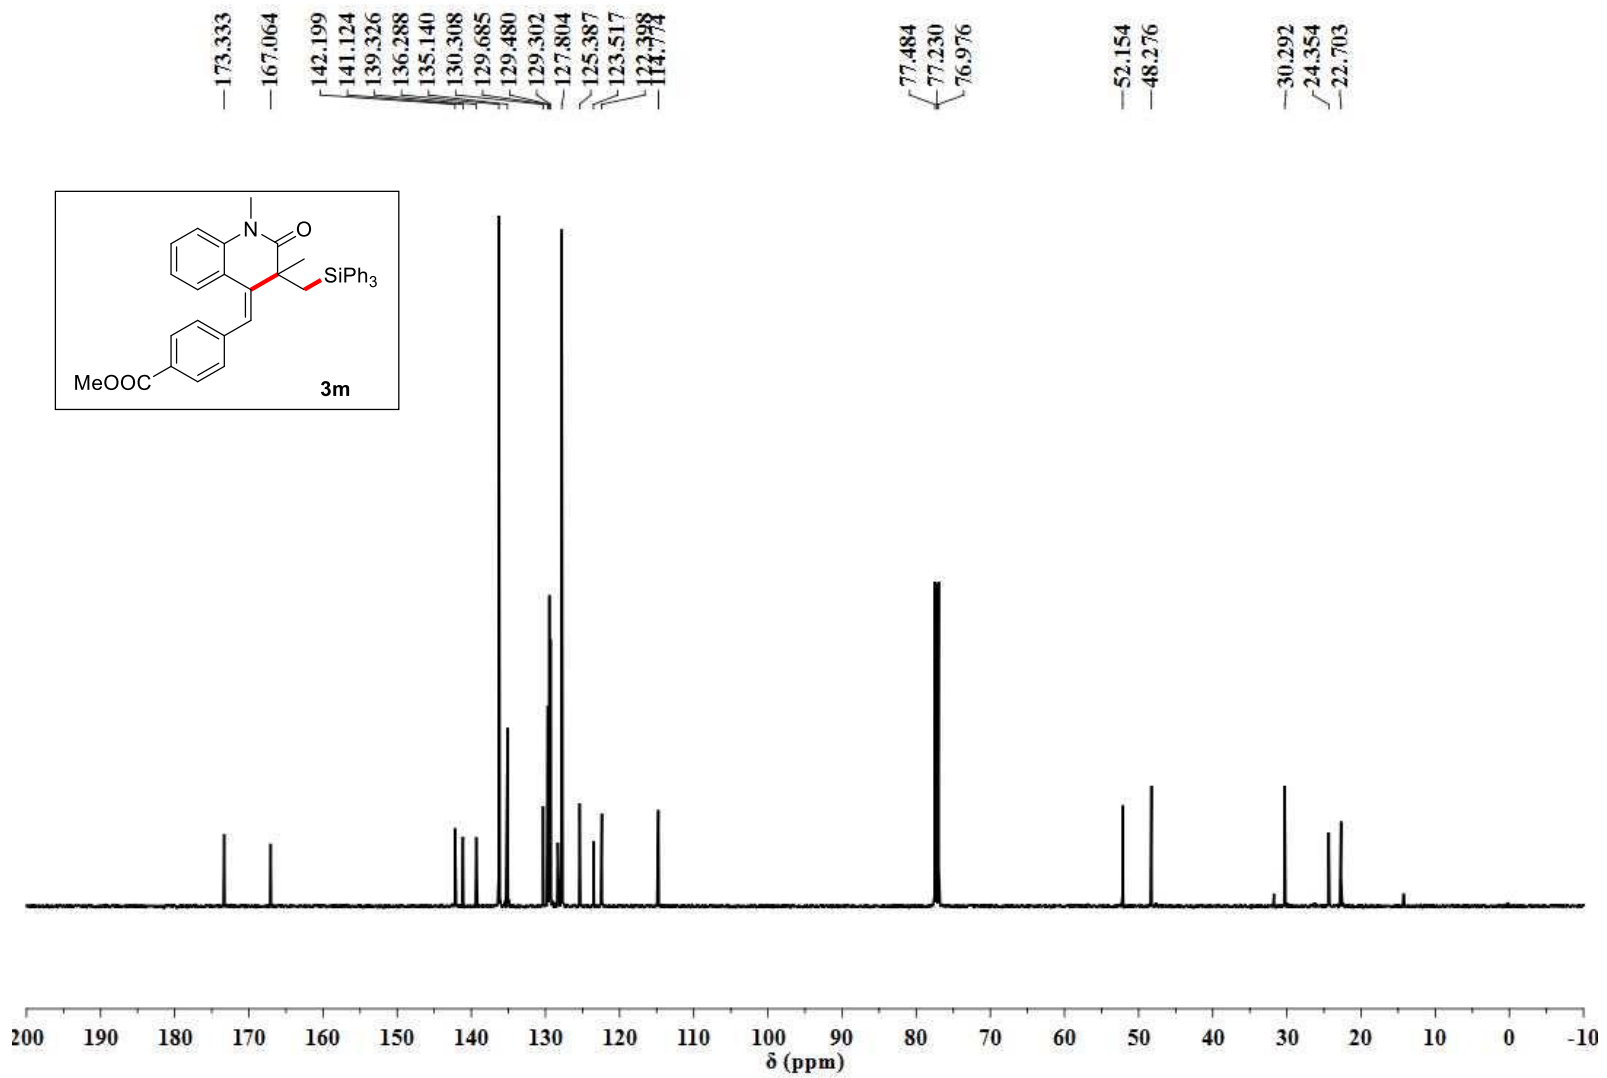

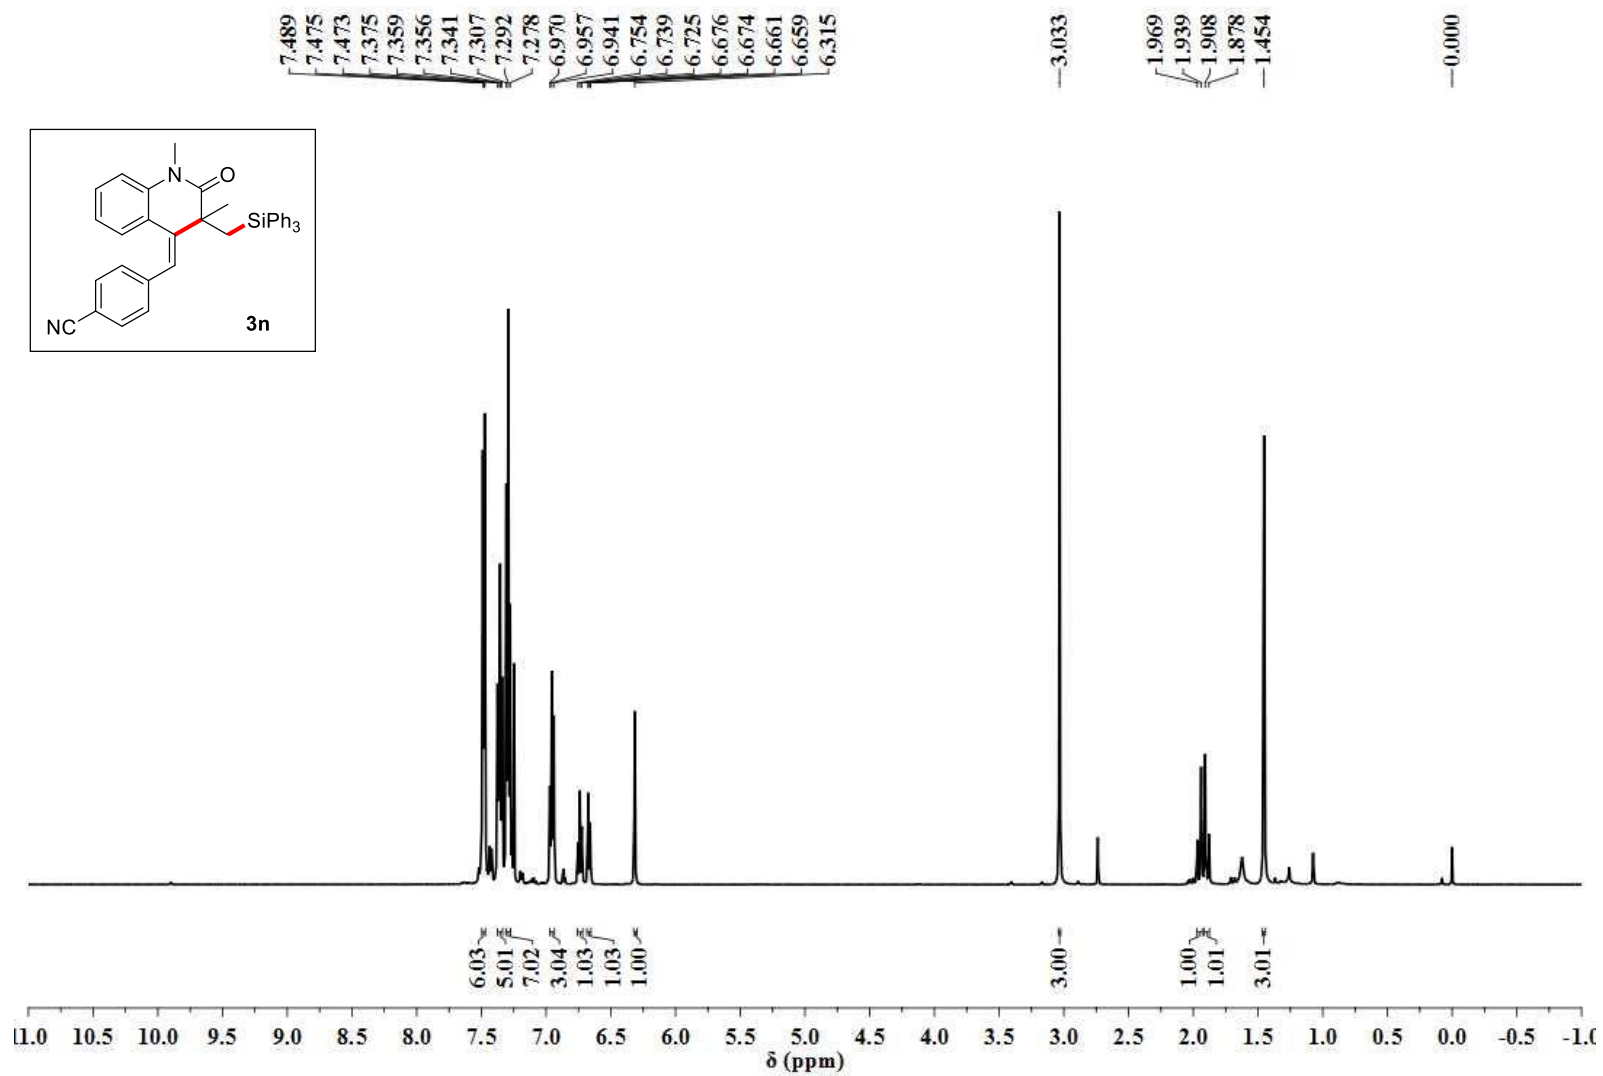

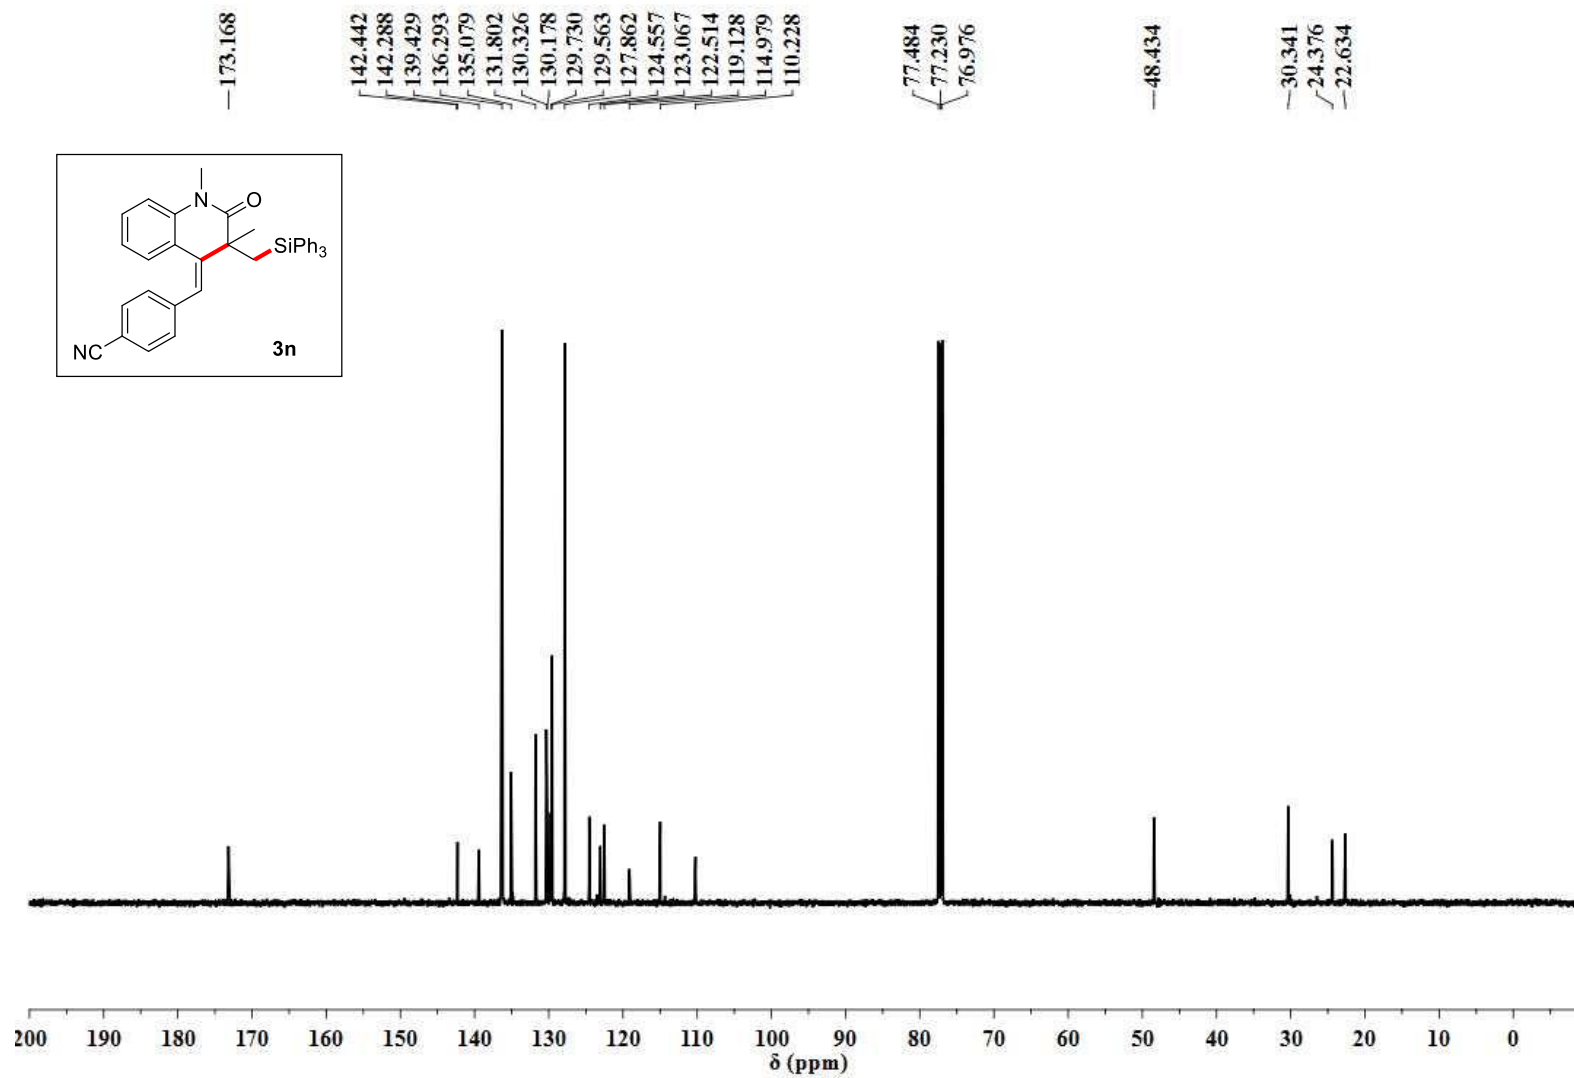

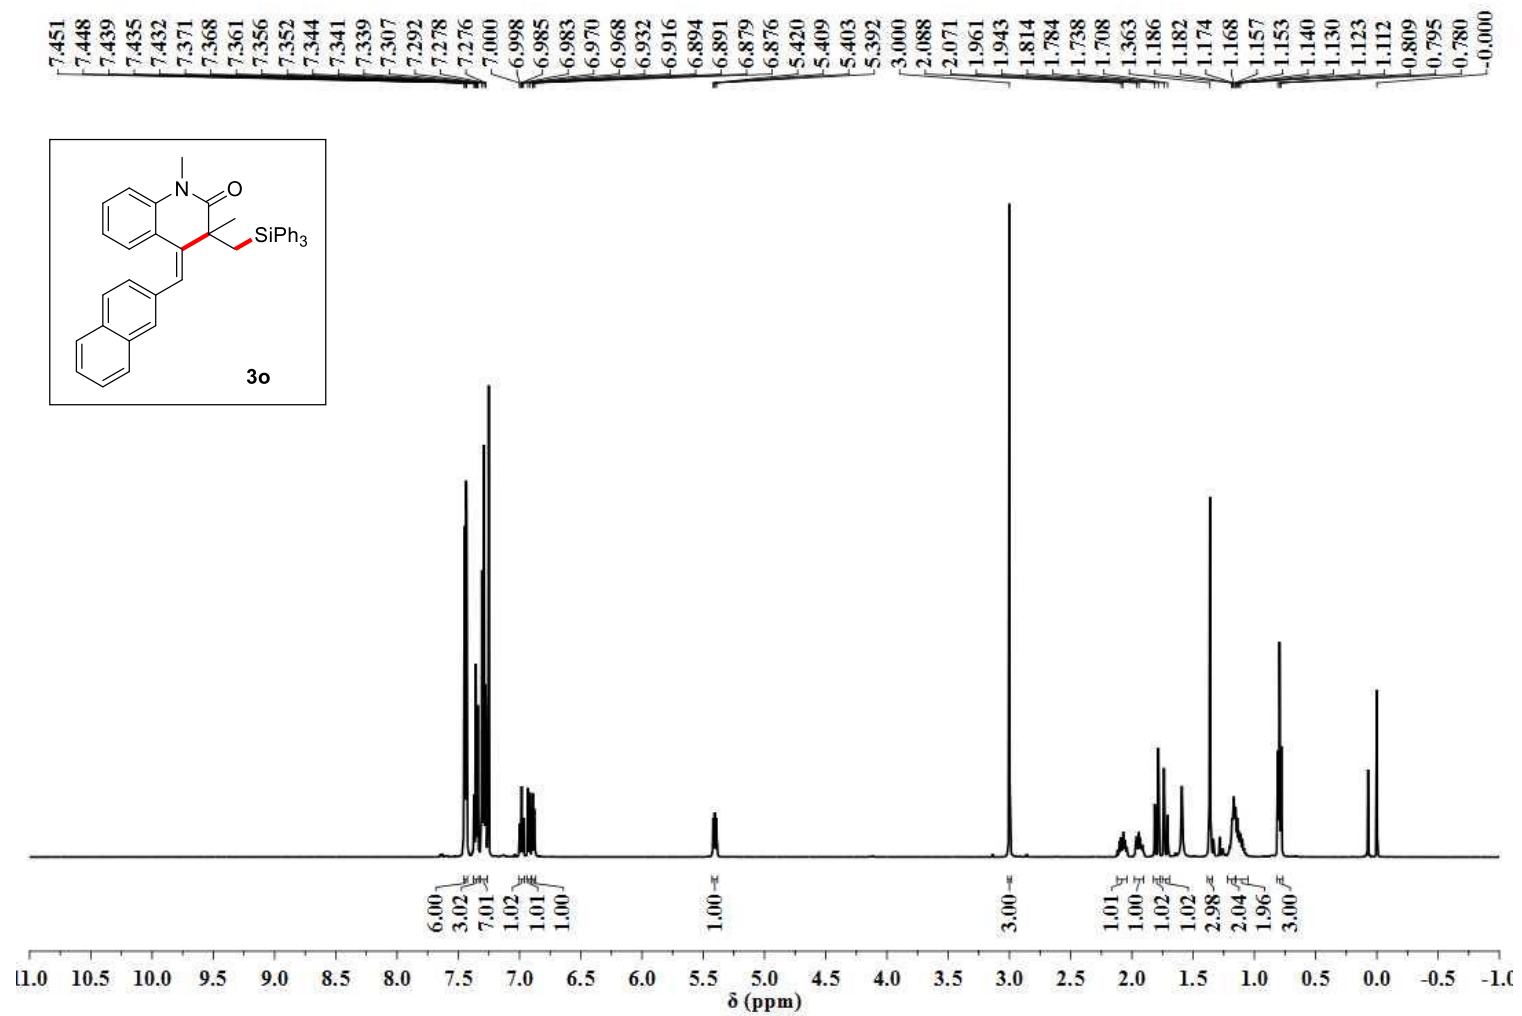

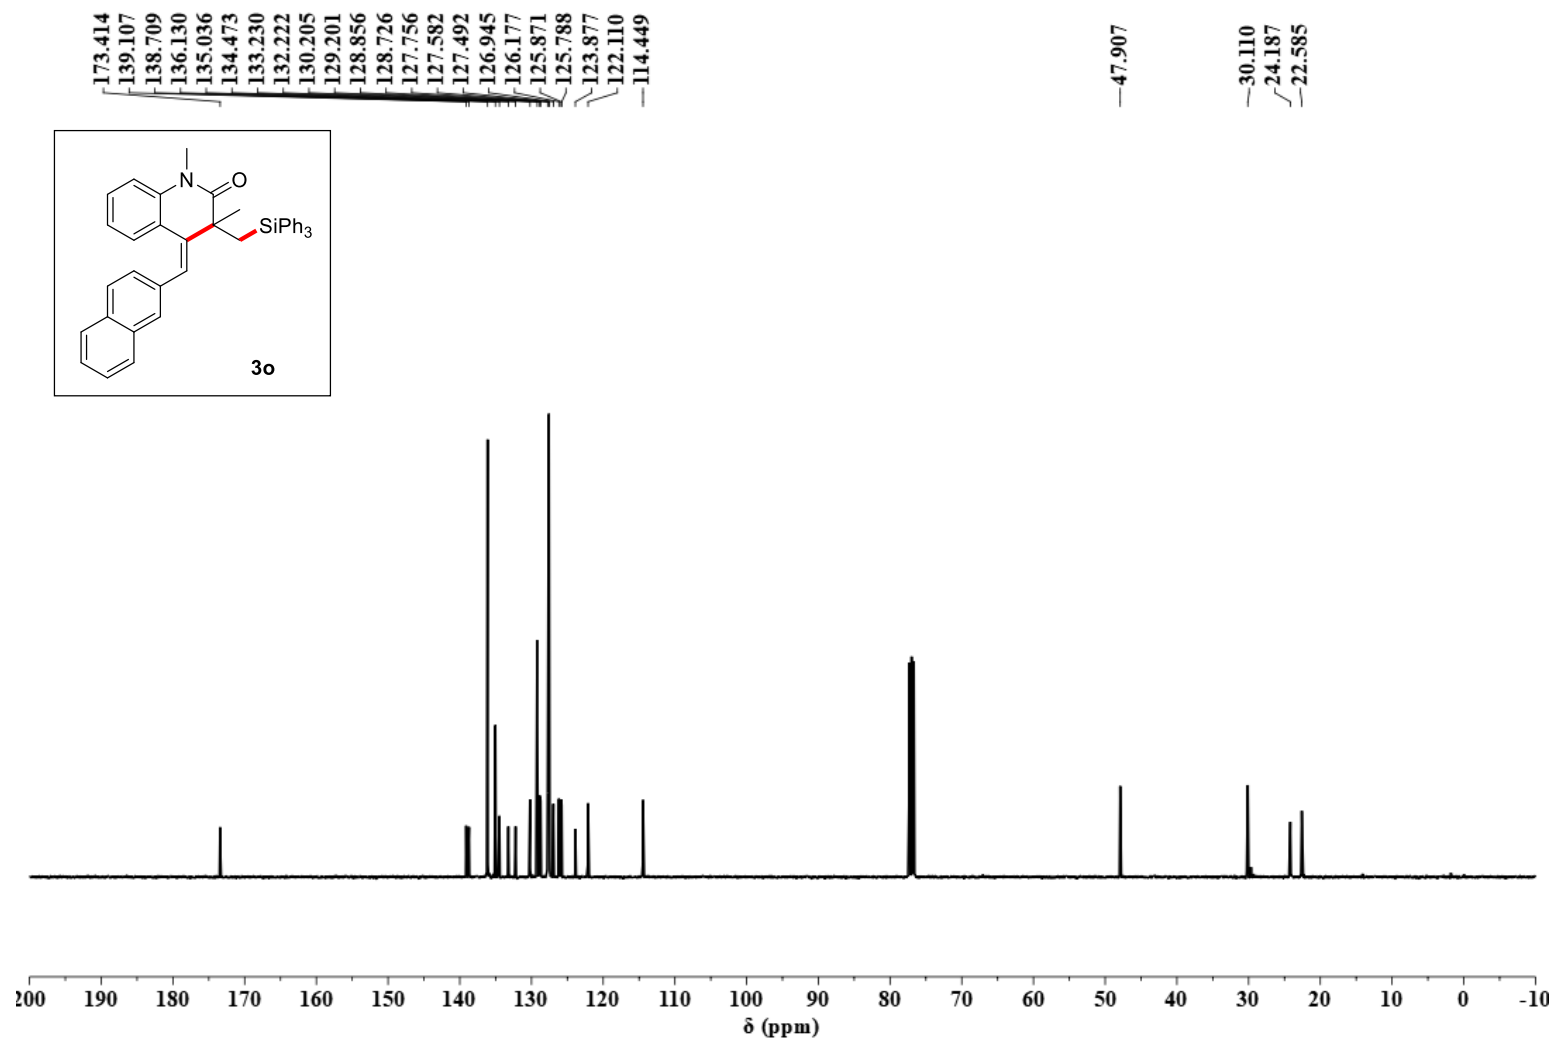



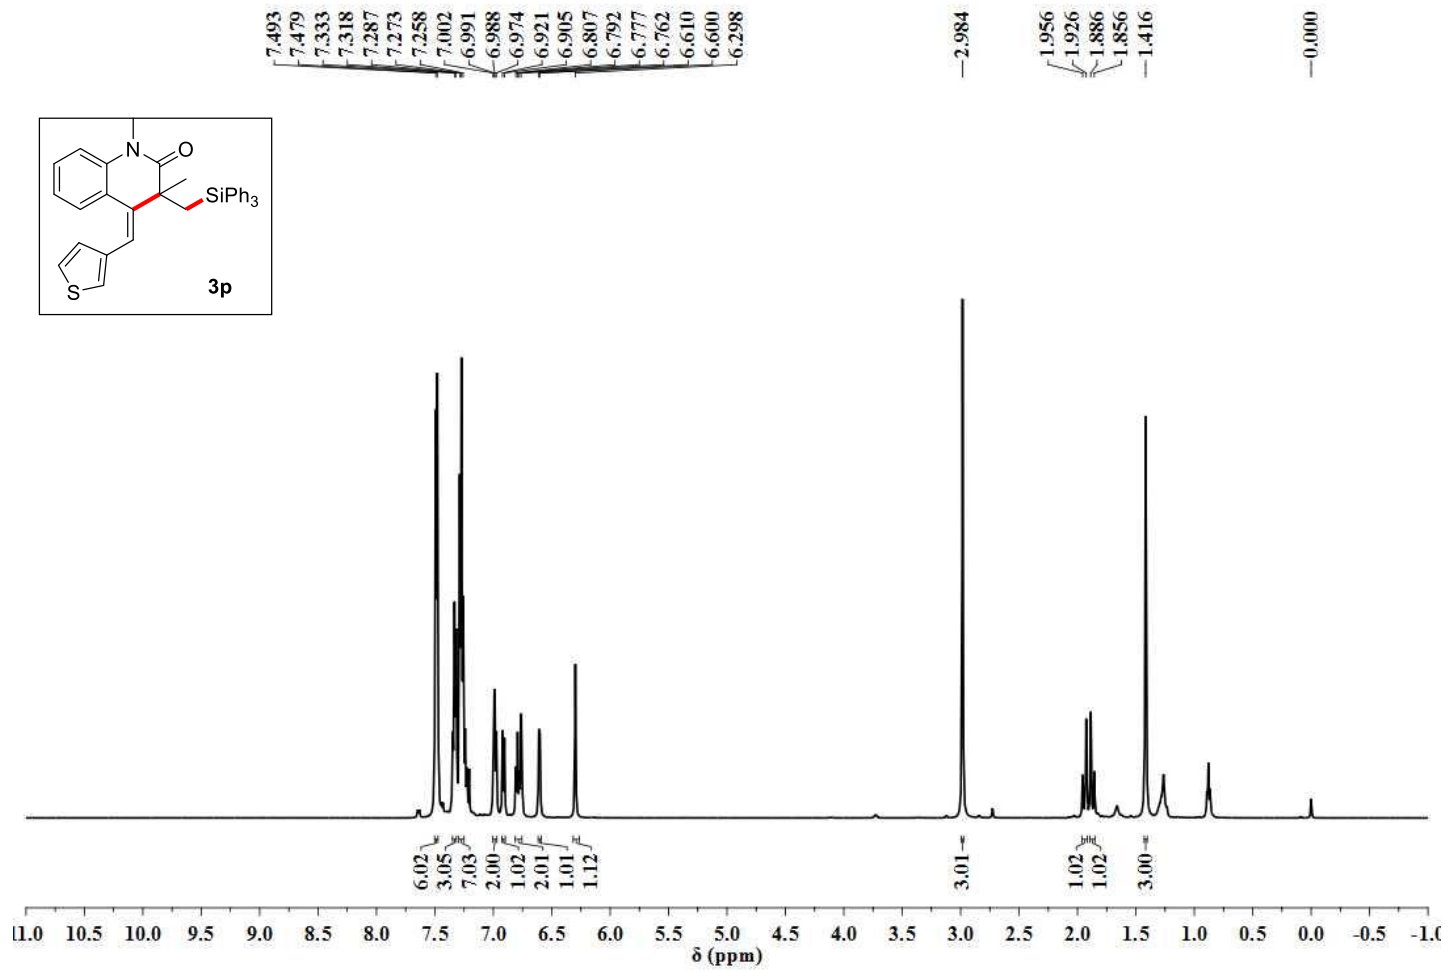

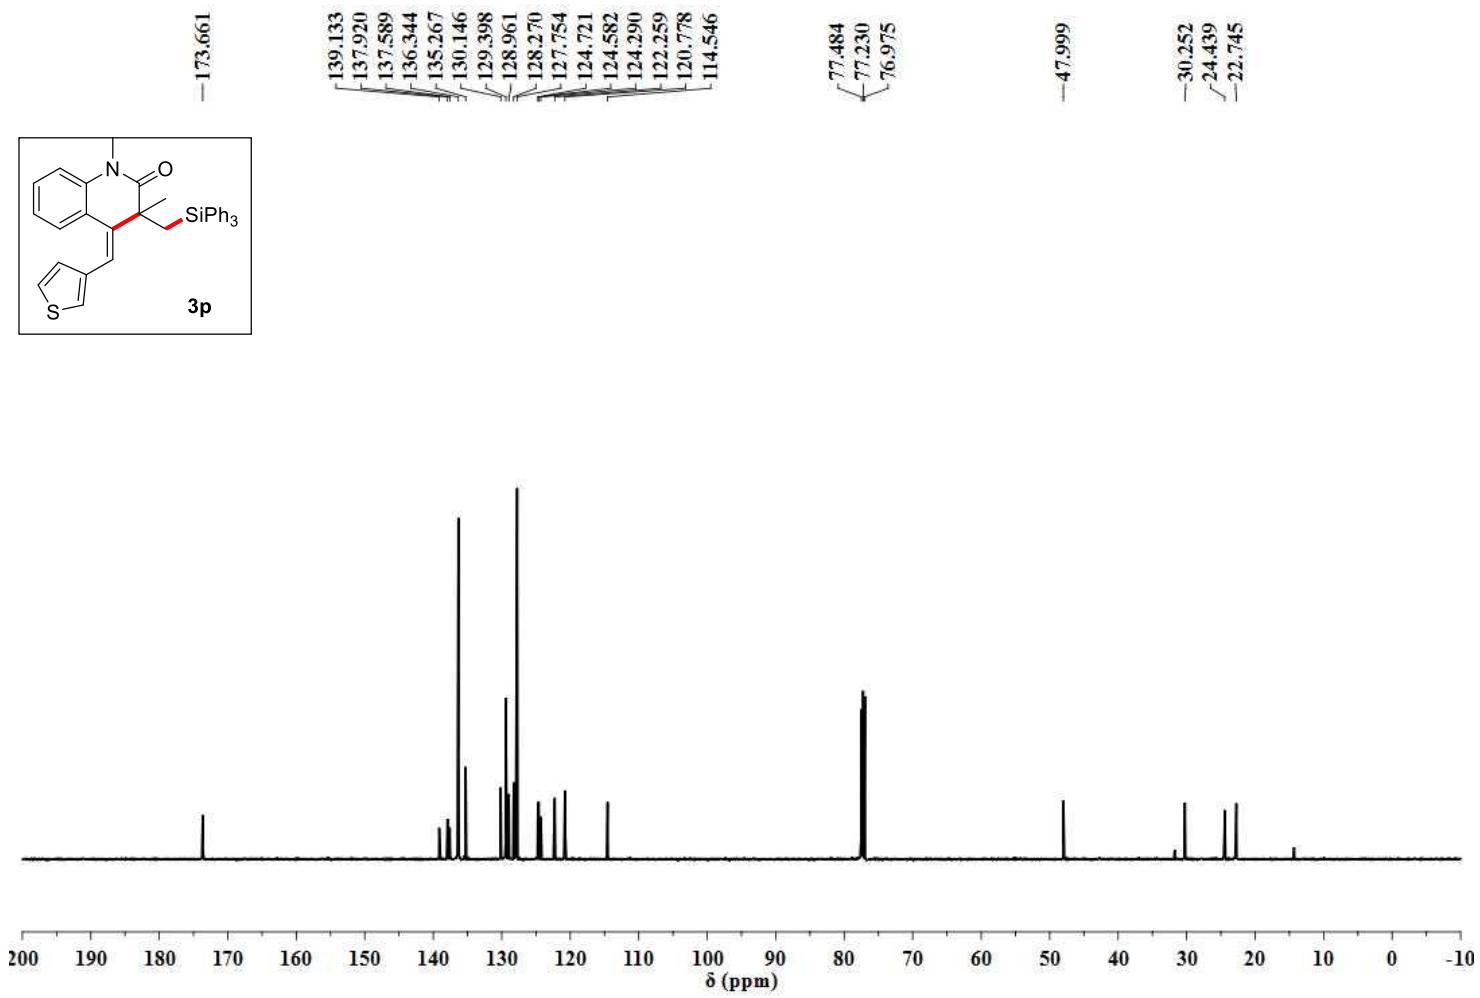

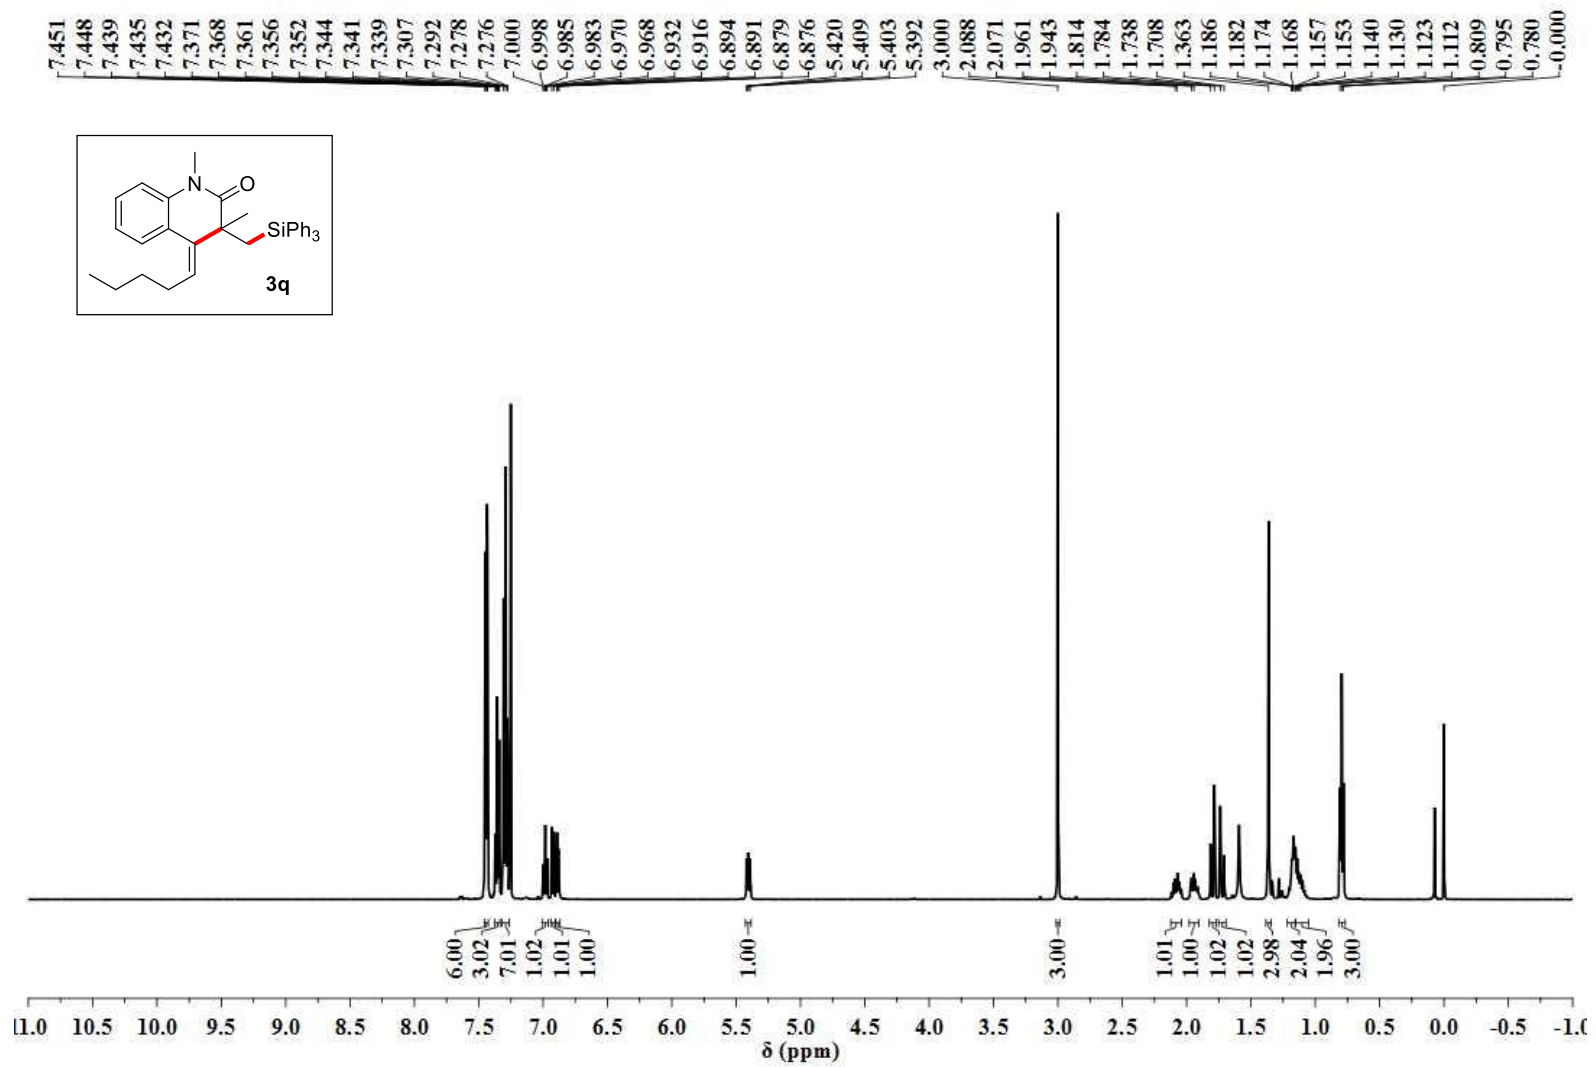

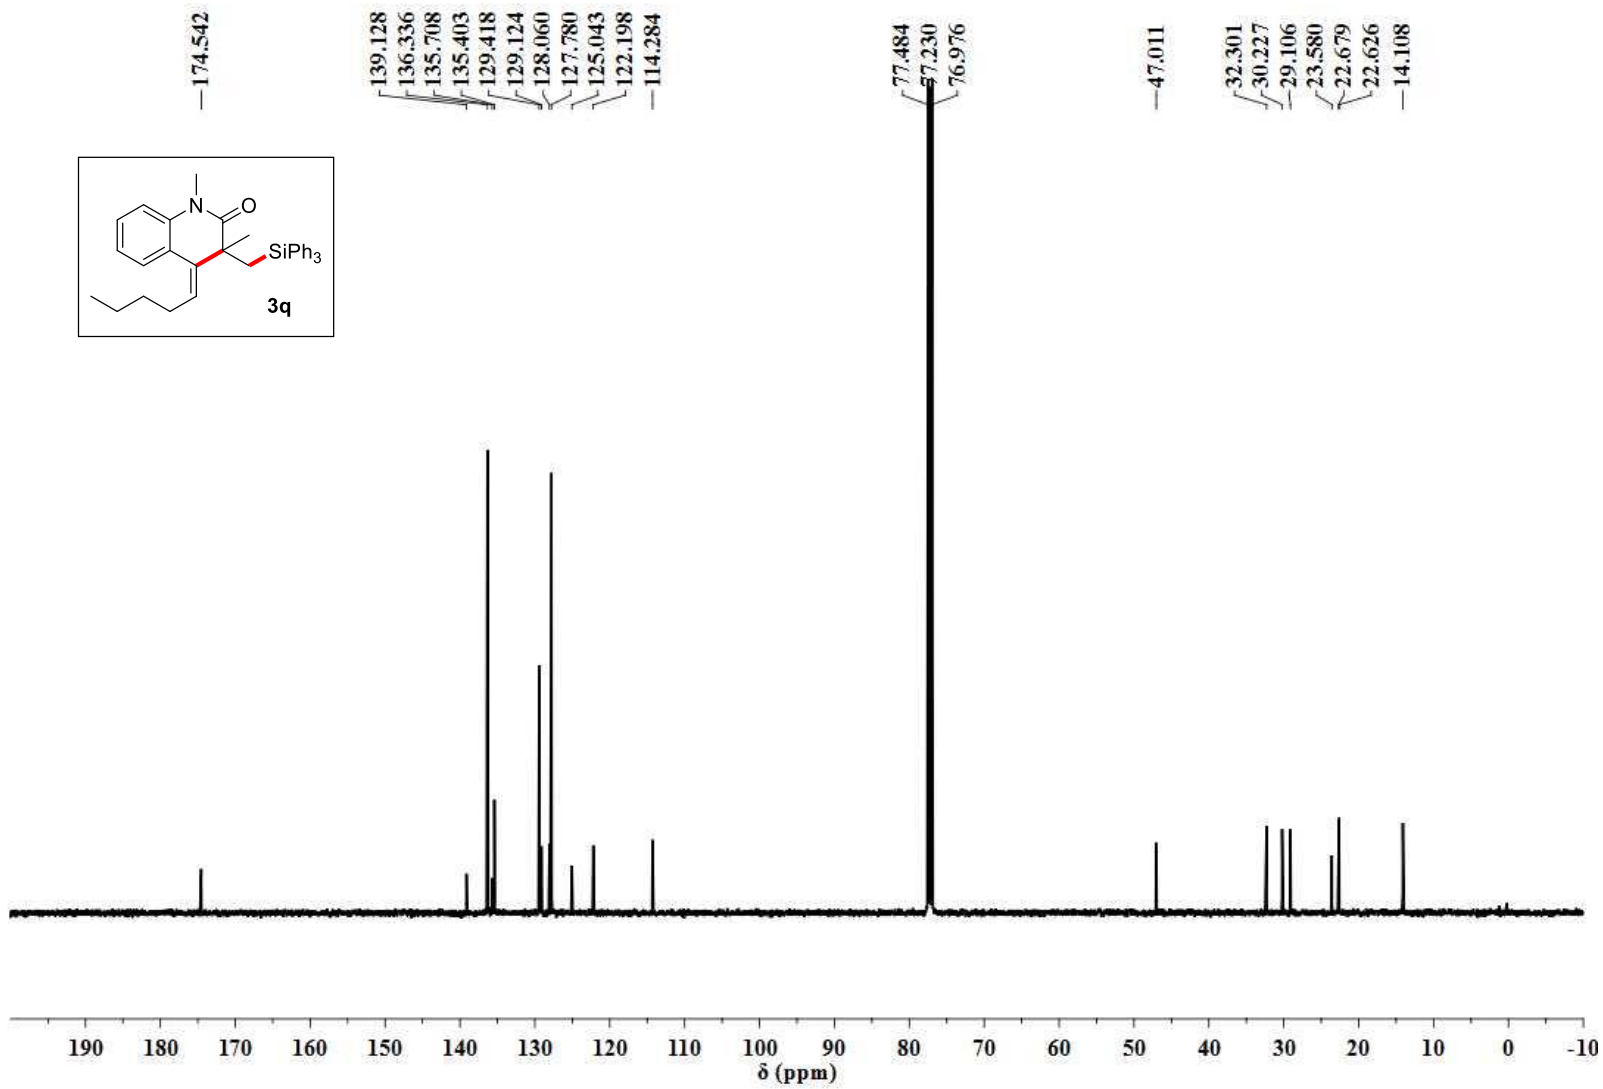

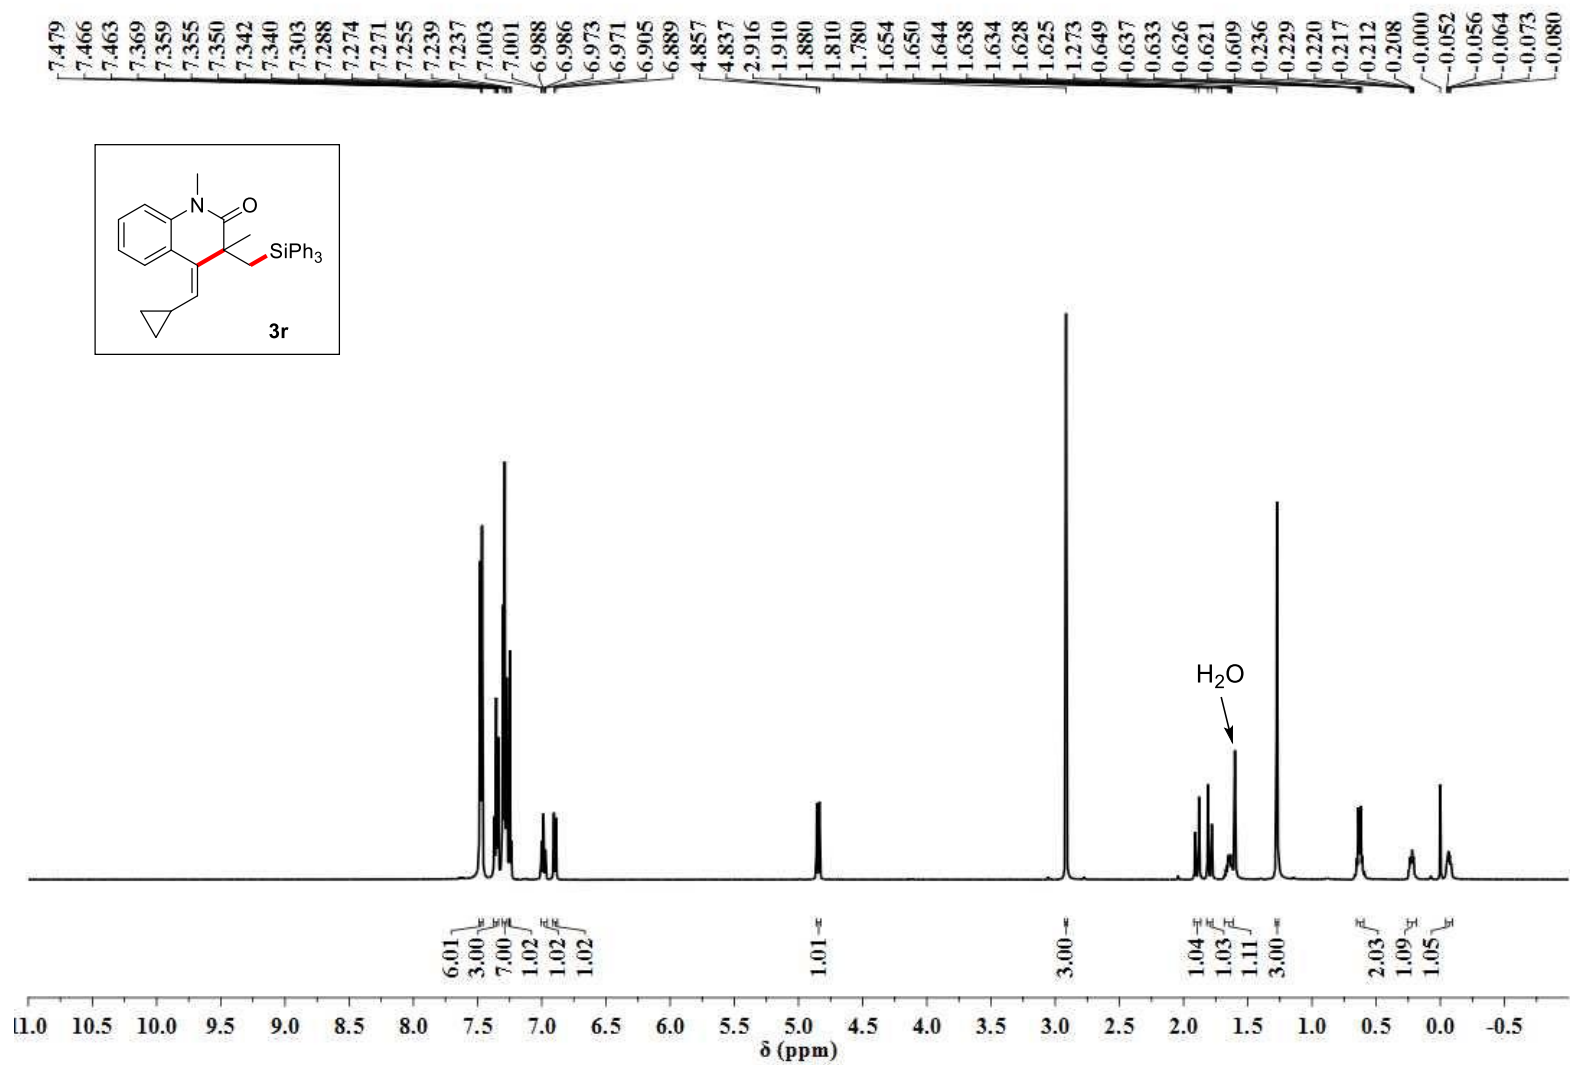

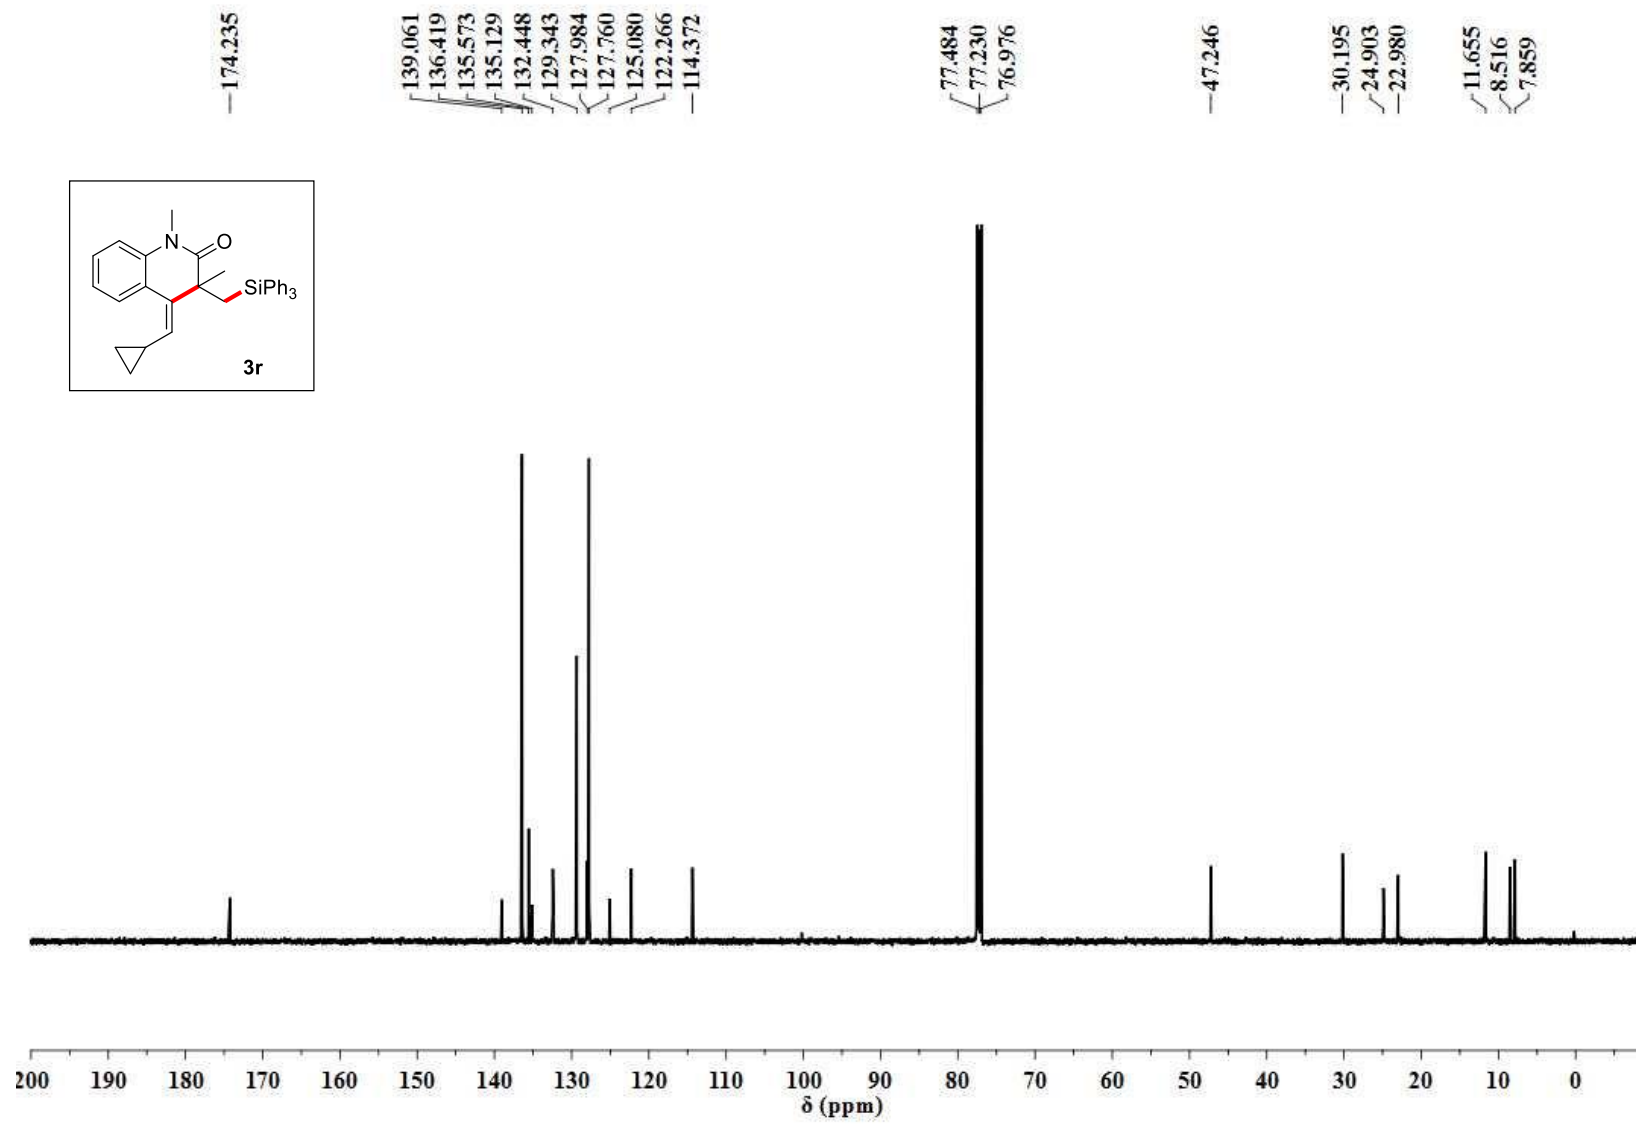

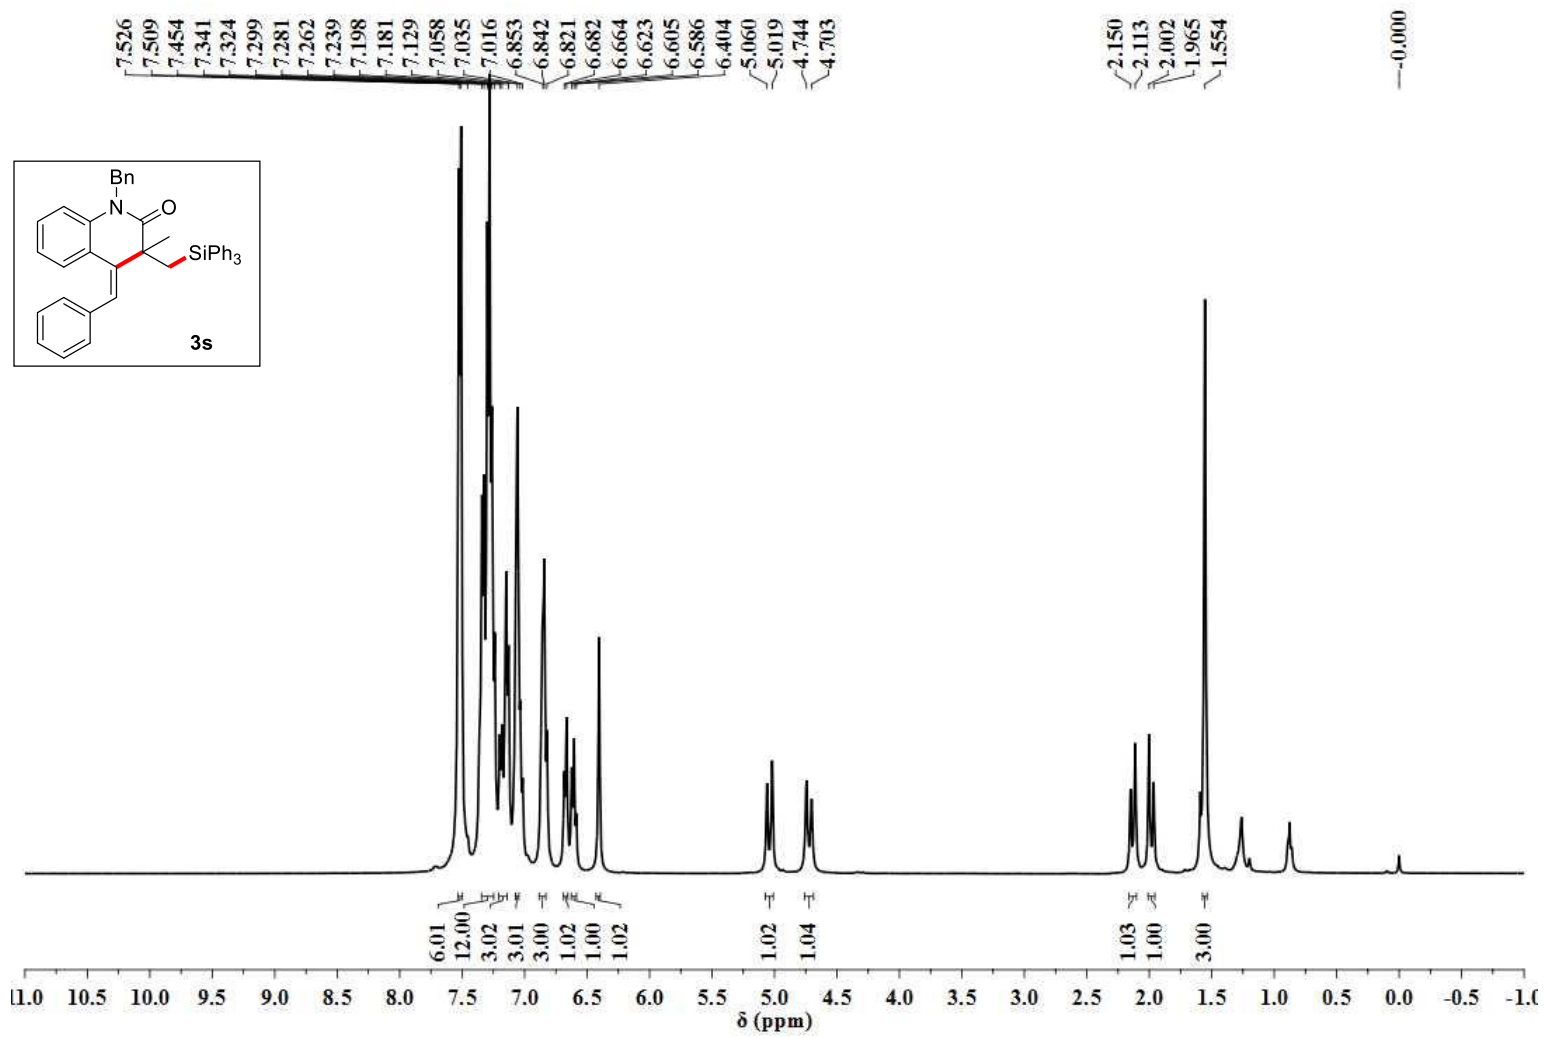

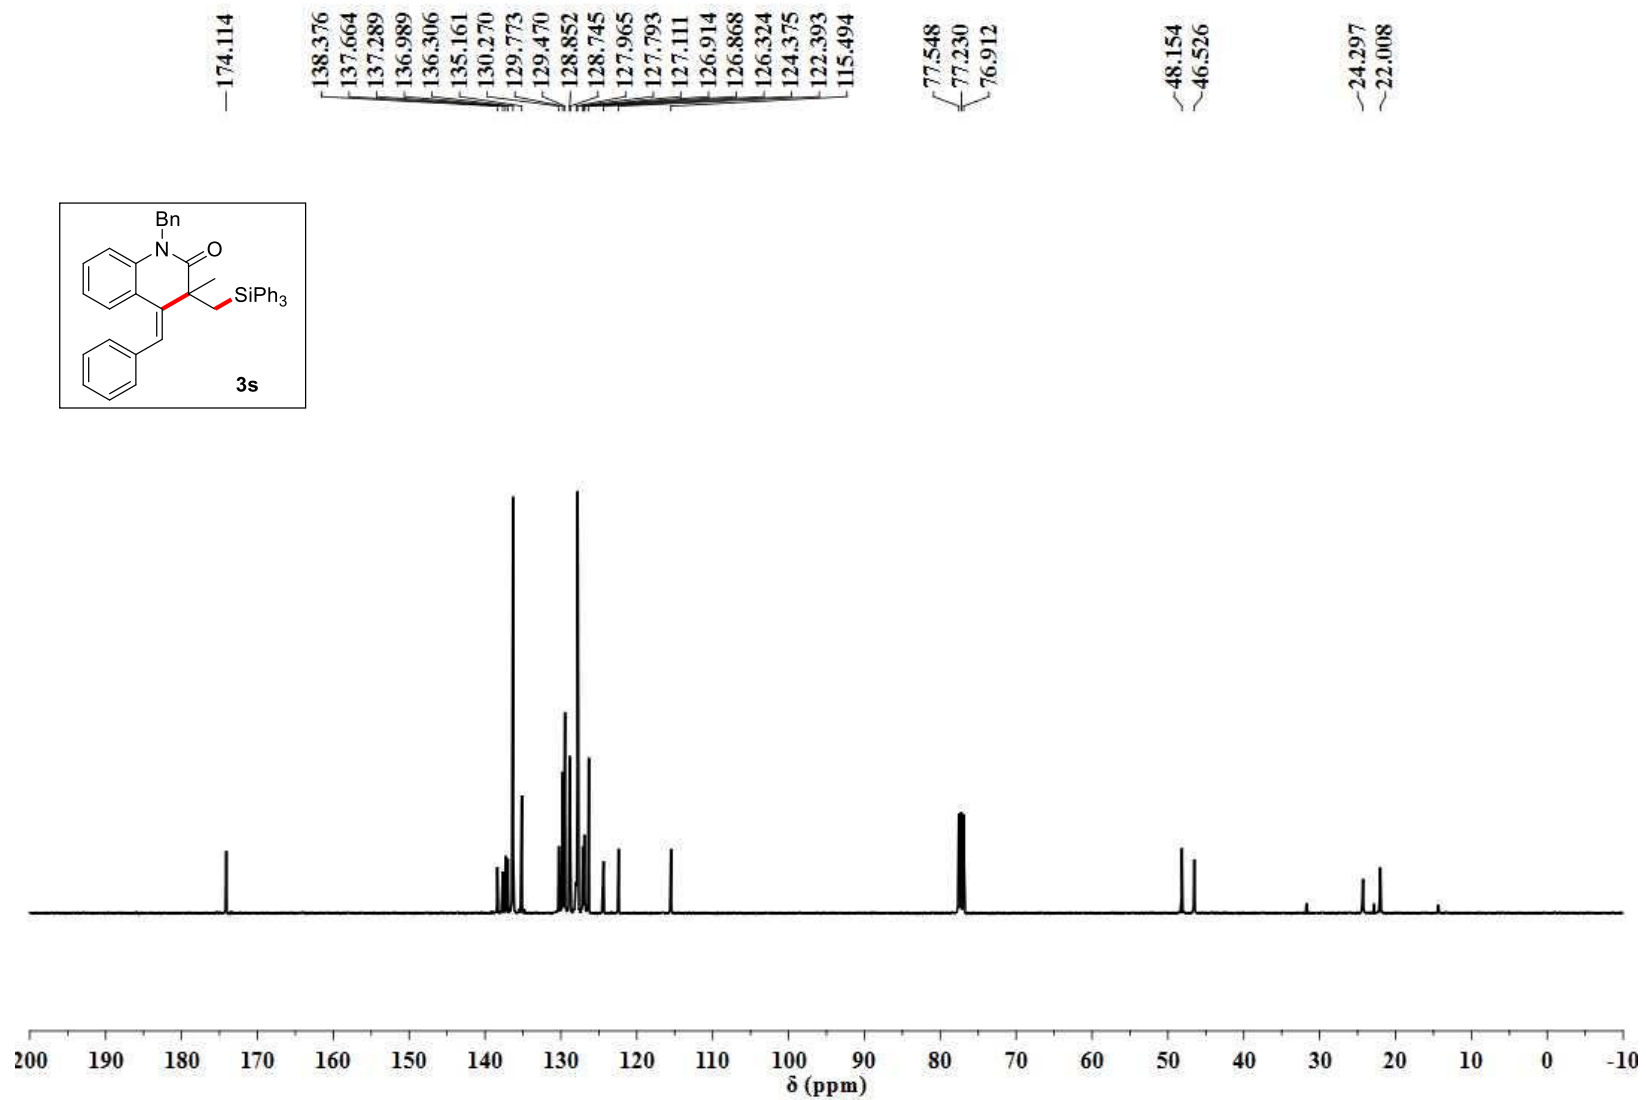



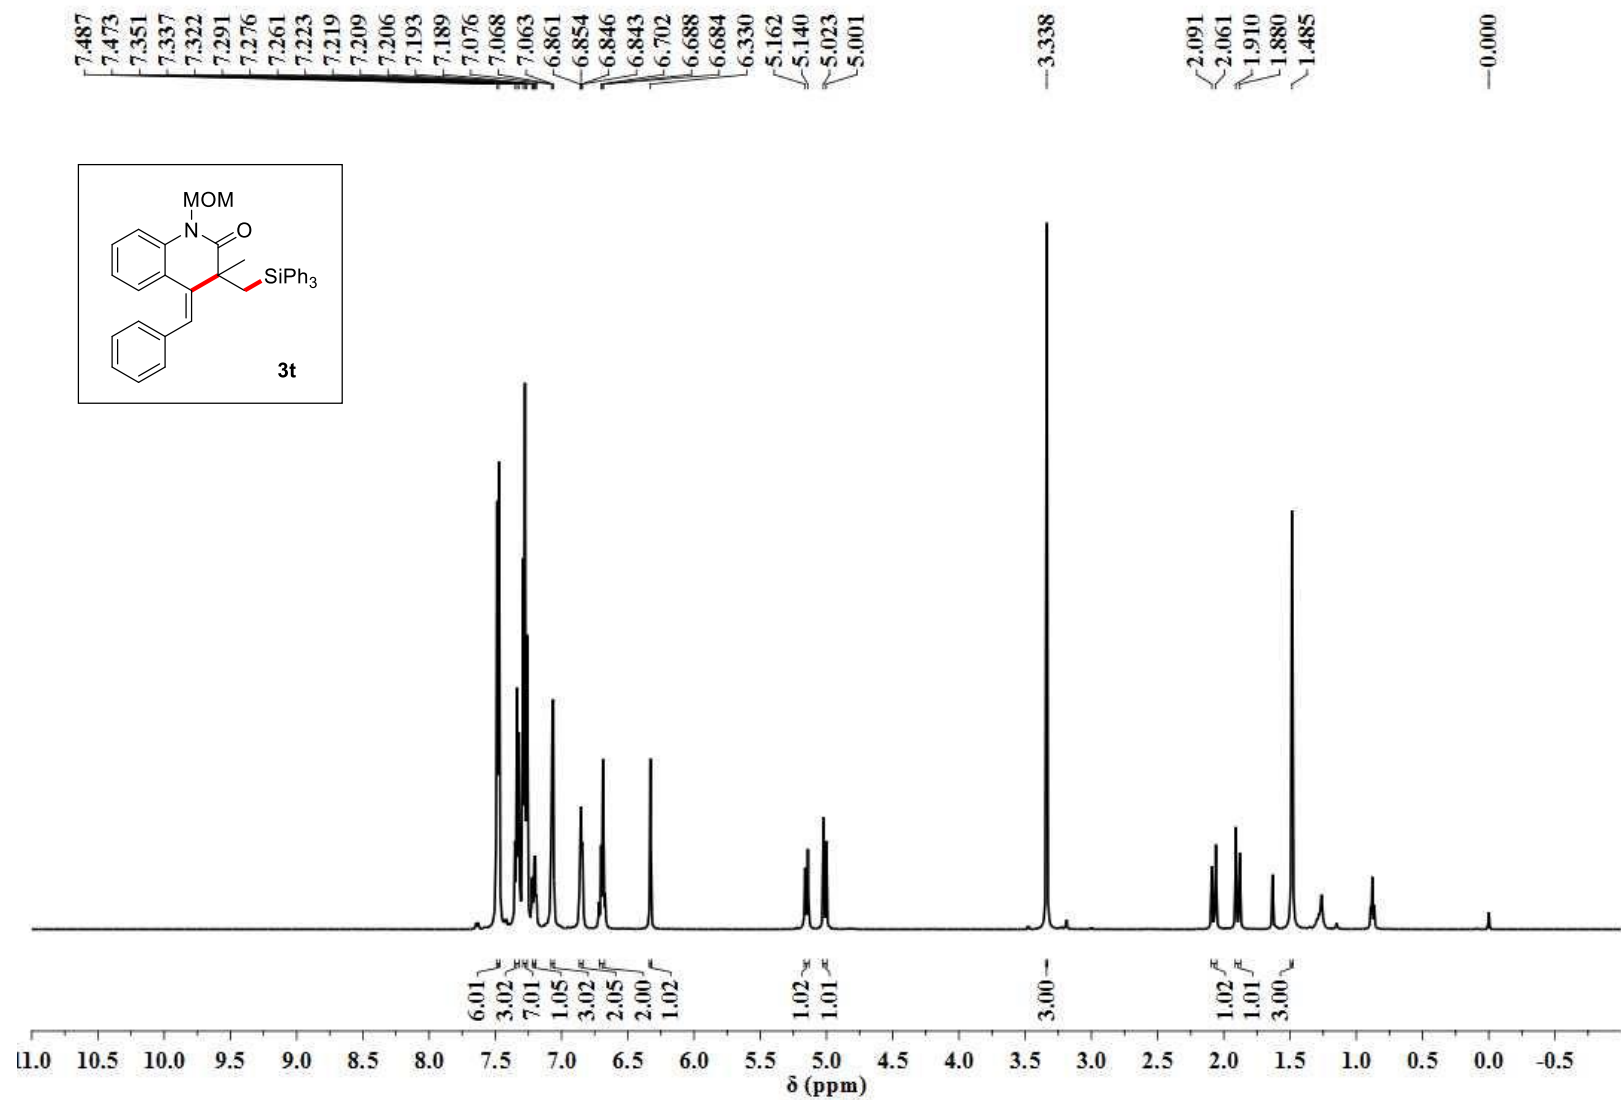

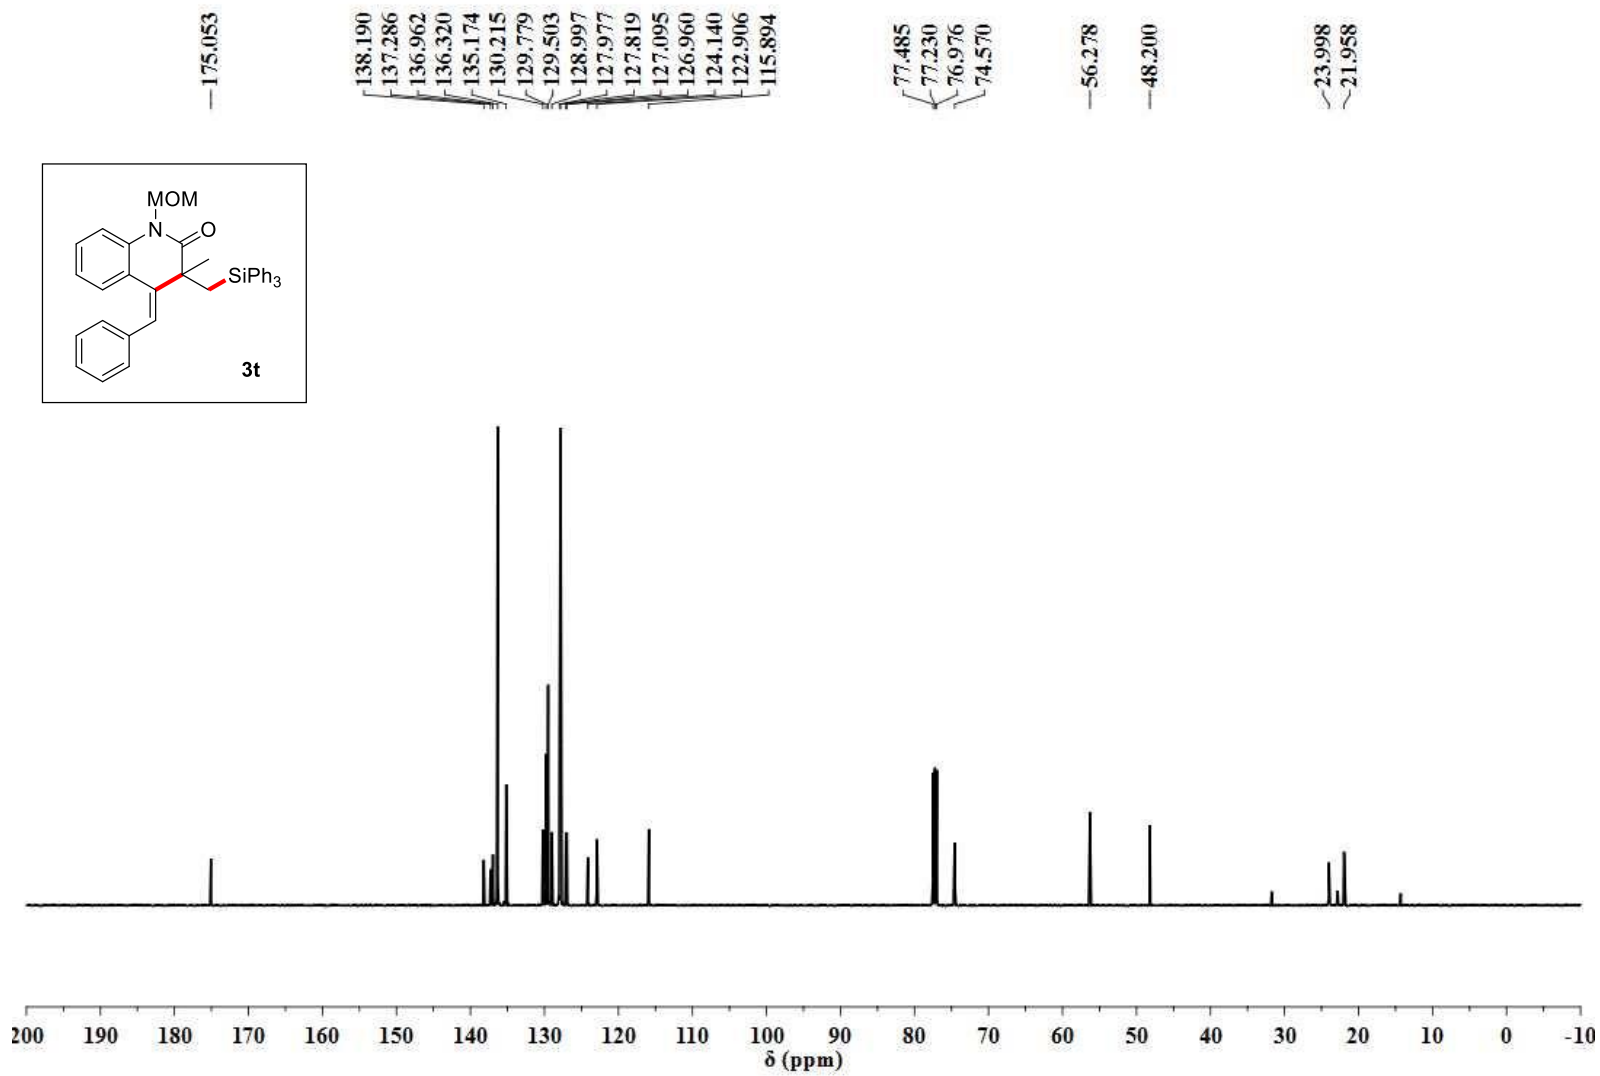

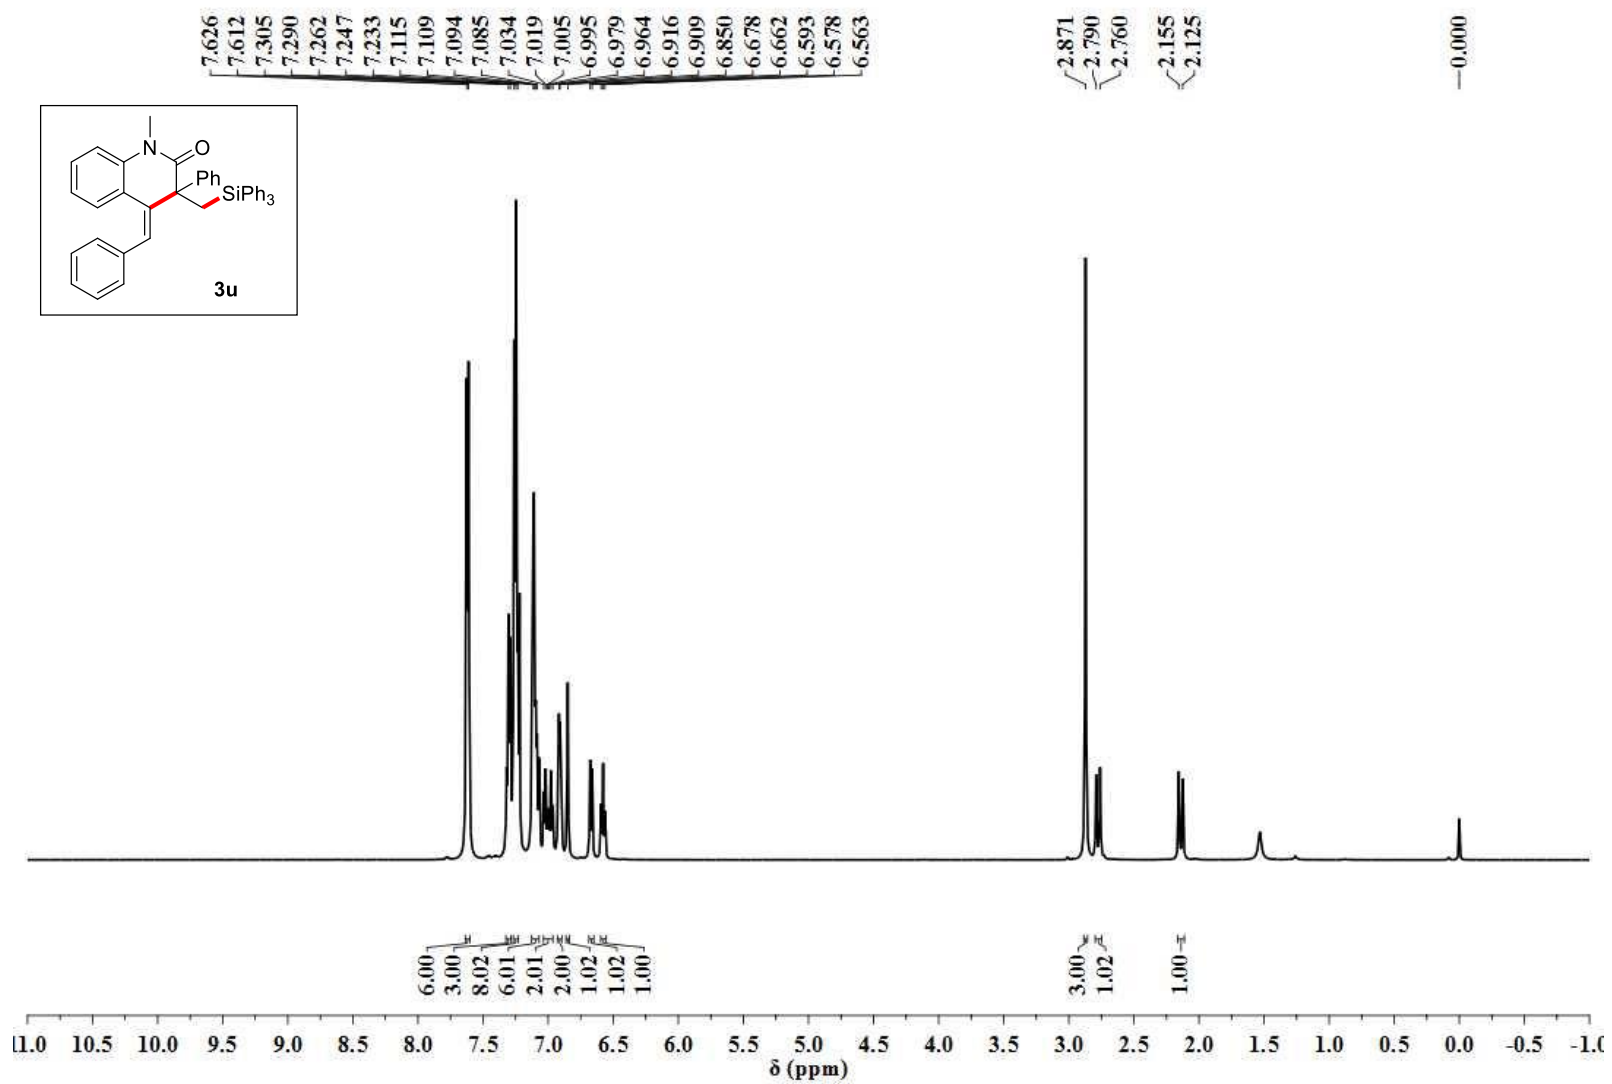

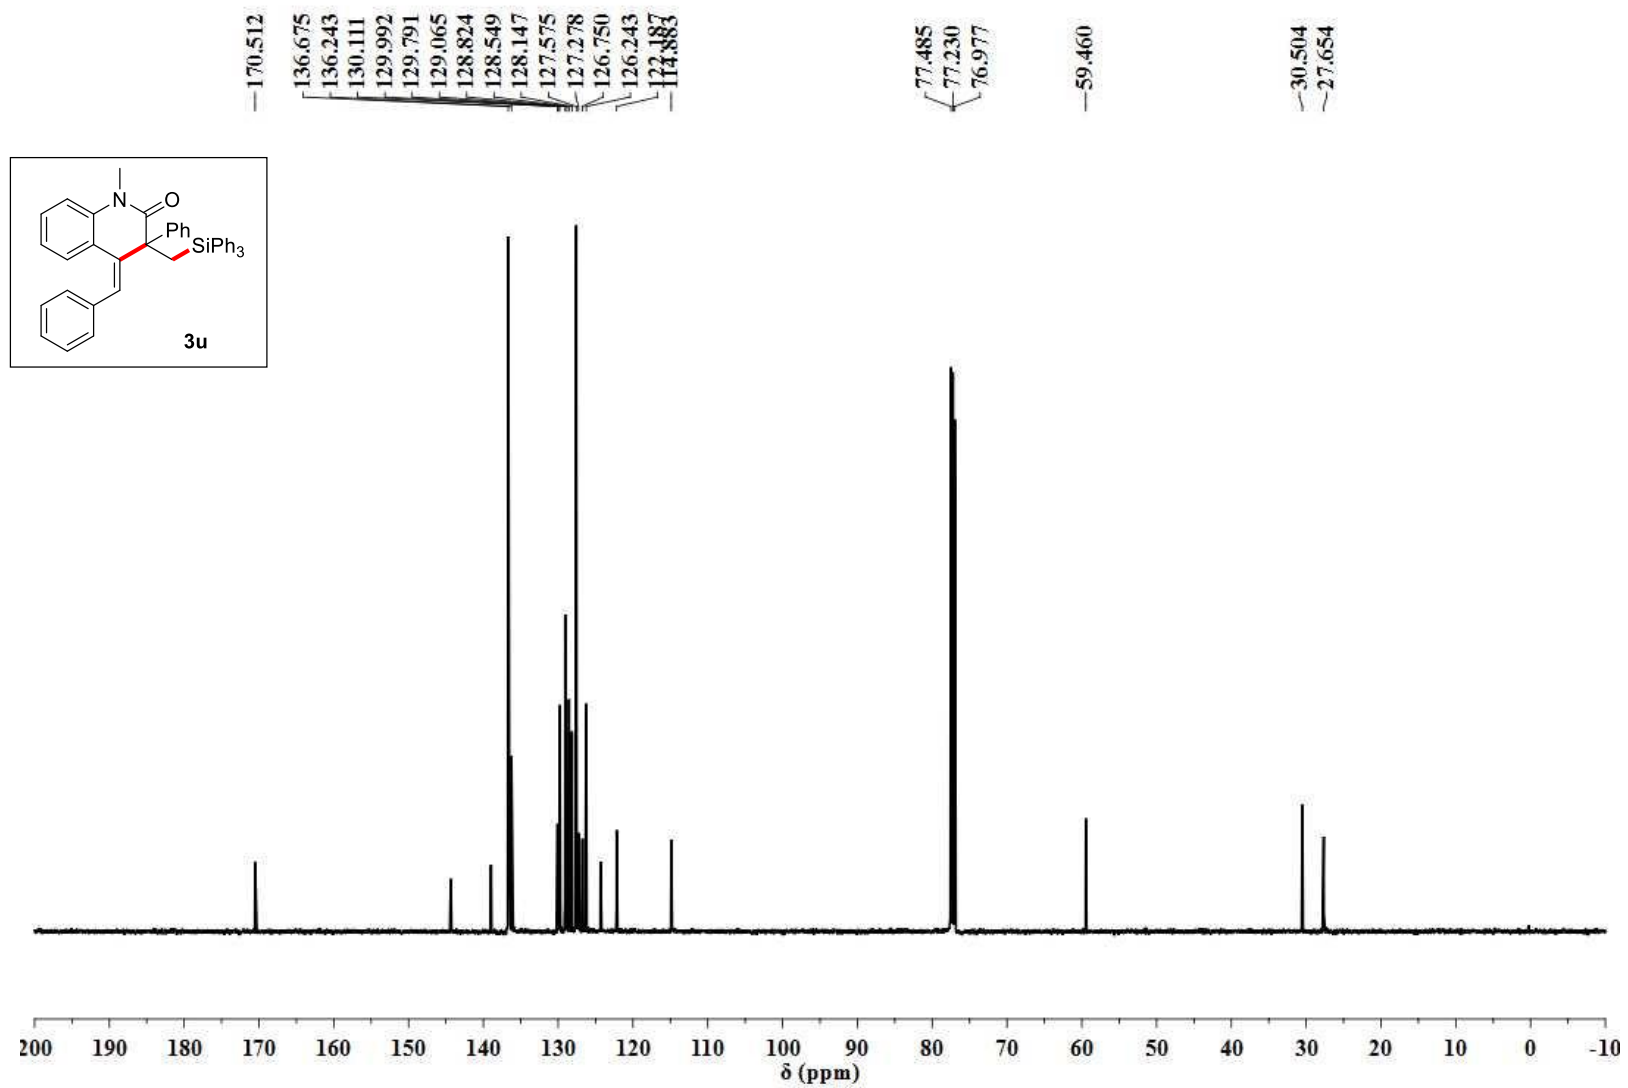

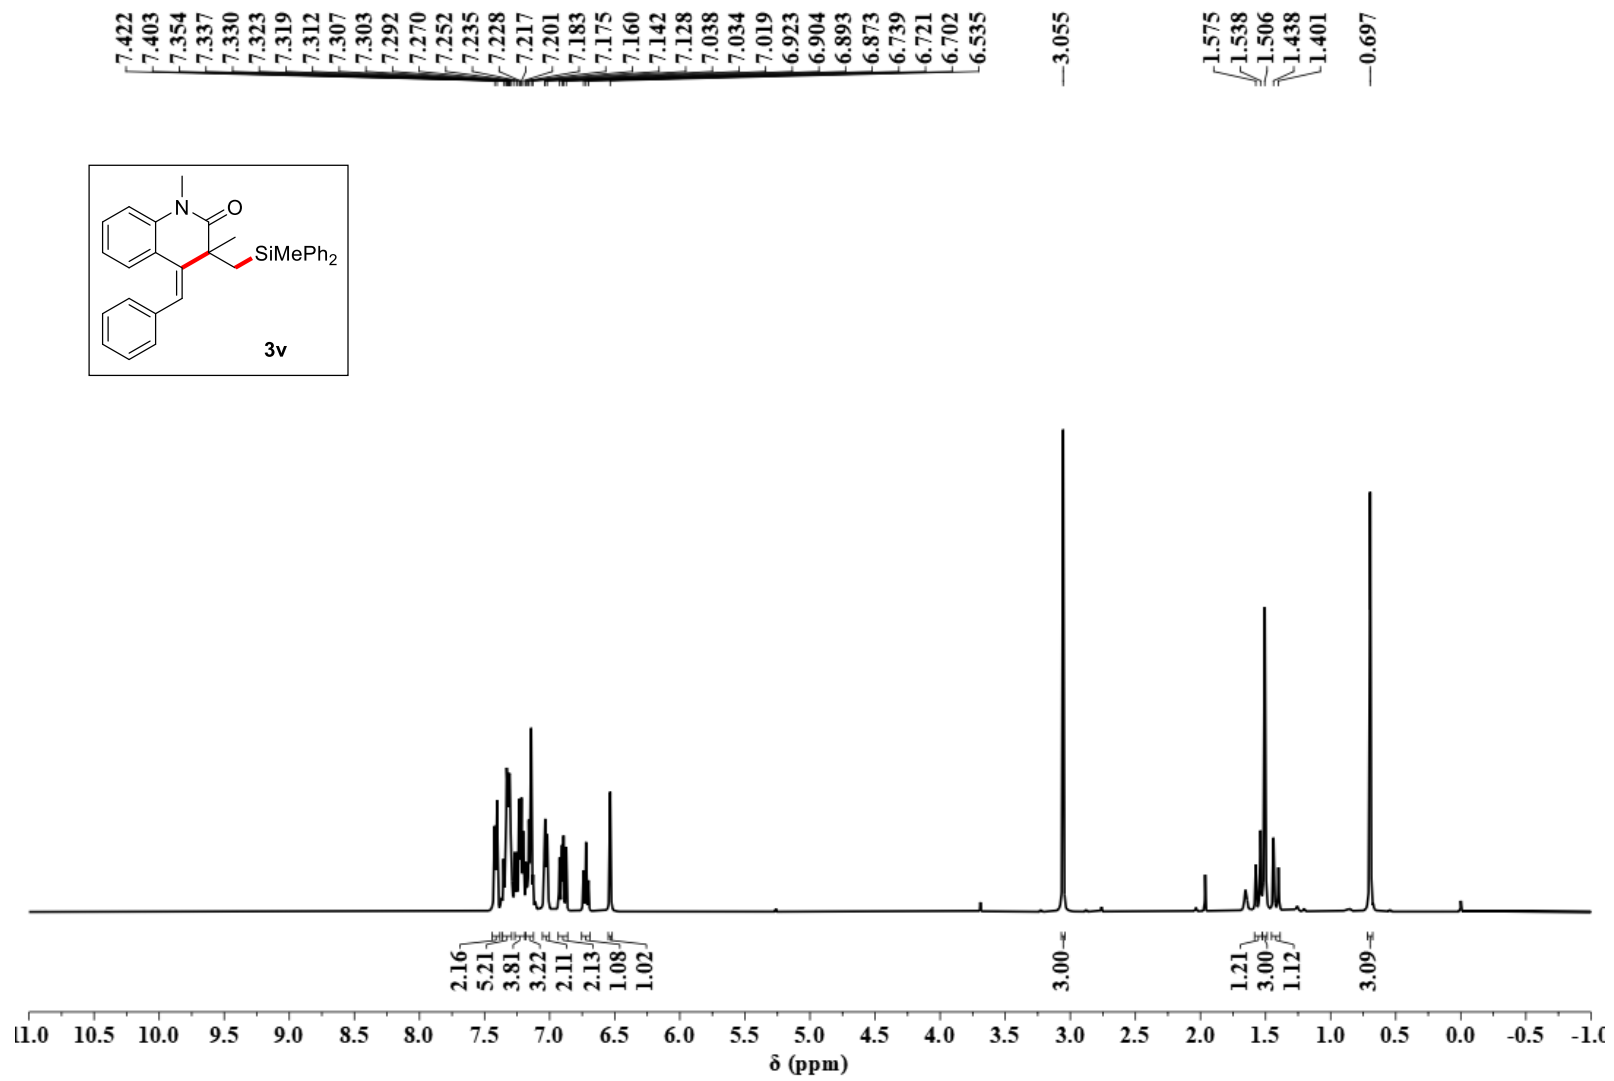

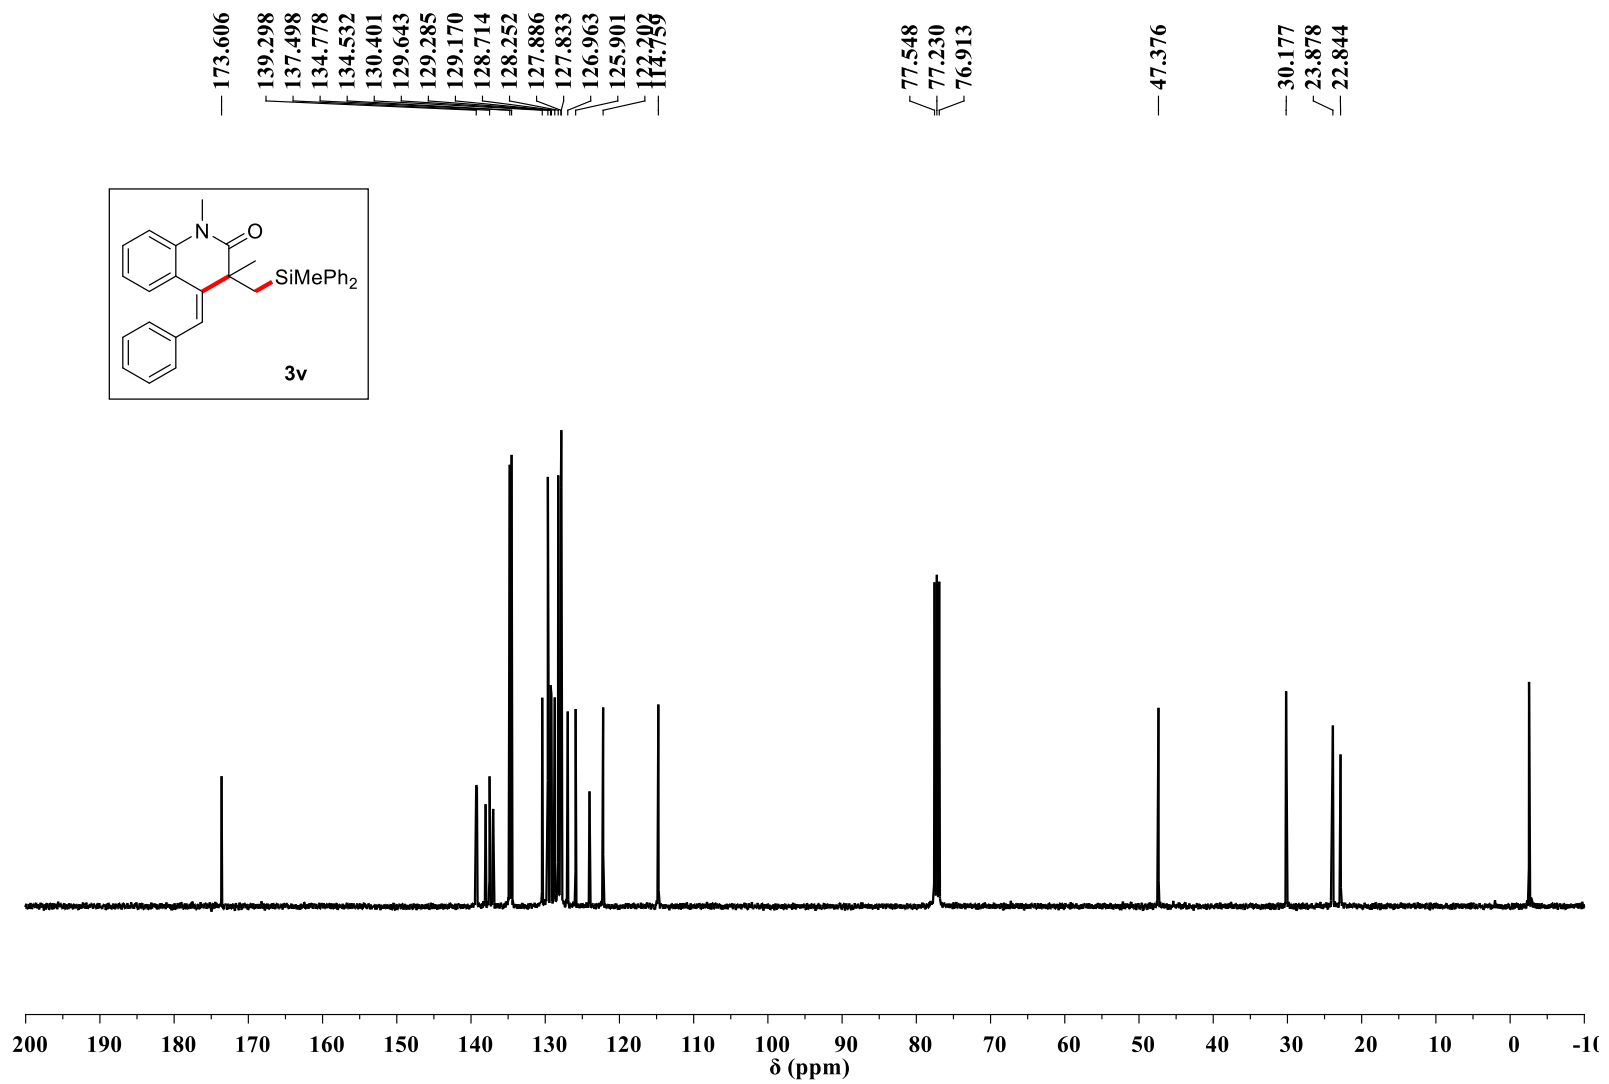

Supplement: d2ob01771g1.pdf [file d2ob01771g1.pdf]
